# Supplementary material for: Diastereoselective synthesis and structure–affinity relationships of σ1 receptor ligands with spirocyclic scaffold
Source: Royal Society of Chemistry journal article supplement (doi:10.1039/d3ob01169k), 2023-01-01
Supplement: d3ob01169k1.pdf [file d3ob01169k1.pdf]

## Supporting information

### Diastereoselective synthesis and structure-affinity relationships of $\sigma_1$ receptor ligands with spirocyclic scaffold

Tobias Winge,<sup>a</sup> Dirk Schepmann,<sup>a</sup> Judith Schmidt,<sup>a</sup> Constantin Daniliuc,<sup>b</sup> Ernst-Ulrich Würthwein,<sup>b</sup> Bernhard Wünsch<sup>a\*</sup>

<sup>a)</sup> Universität Münster, Institut für Pharmazeutische und Medizinische Chemie, Corrensstraße 48, D-48149 Münster, Germany

Tel.: +49-251-8333311; Fax: +49-251-8332144; Email: wuensch@uni-muenster.de

<sup>b)</sup> Universität Münster, Organisch-Chemisches Institut and Center for Multiscale Theory and Computation (CMTc), Corrensstraße 40, D-48149 Münster, Germany

### Contents

|                                                        |    |
|--------------------------------------------------------|----|
| Chemistry, General Methods.....                        | 2  |
| HPLC Analysis.....                                     | 3  |
| Synthesis of some educts.....                          | 5  |
| X-ray crystal structure analysis of 8b (dan10126)..... | 11 |
| Receptor binding studies.....                          | 16 |
| Performance of the binding assays.....                 | 19 |
| Quantum chemical Calculations.....                     | 21 |
| References.....                                        | 37 |
| NMR Spectra.....                                       | 40 |
| HPLC purity measurements.....                          | 76 |

## Chemistry, General Methods

Oxygen and moisture sensitive reactions were carried out under nitrogen, dried with silica gel with moisture indicator (orange gel, VWR, Darmstadt, Germany) and in dry glassware (Schlenk flask or Schlenk tube). Temperature was controlled with dry ice/acetone (-78 °C), ice/water (0 °C), Cryostat (Julabo TC100E-F, Seelbach, Germany), magnetic stirrer MR 3001 K (Heidolph, Schwalbach, Germany) or RCT CL (IKA, Staufen, Germany), together with temperature controller EKT HeiCon (Heidolph) or VT-5 (VWR) and PEG or silicone bath. All solvents were of analytical or technical grade quality. Demineralized water was used. CH<sub>2</sub>Cl<sub>2</sub> was distilled from CaH<sub>2</sub>; THF was distilled from sodium/benzophenone; MeOH was distilled from magnesium methanolate. Thin layer chromatography (tlc): tlc silica gel 60 F<sub>254</sub> on aluminum sheets (VWR). Flash chromatography (fc): Silica gel 60, 40–63 μm (VWR); parentheses include: diameter of the column (∅), length of the stationary phase (h), fraction size (v) and eluent. Automated flash chromatography: Isolera™ Spektra One (Biotage®); parentheses include: cartridge size, eluent, fractions size was always 20 mL. Dry column vacuum chromatography (DCVC) was performed according to Pedersen *et al* using glass funnels with sintered glass disc filters and a height of 11 cm;<sup>1</sup> parentheses include: diameter of the column (∅), length of the compressed stationary phase (h), eluent. Melting point: Melting point system MP50 (Mettler Toledo, Gießen, Germany), open capillary, uncorrected. MS: MicroTOFQII mass spectrometer (Bruker Daltonics, Bremen, Germany); deviations of the found exact masses from the calculated exact masses were 5 ppm or less; the data were analyzed with DataAnalysis® (Bruker Daltonics). NMR: NMR spectra were recorded in deuterated solvents on Agilent DD2 400 MHz and 600 MHz spectrometers (Agilent, Santa Clara CA, USA); chemical shifts (δ) are reported in parts per million (ppm) against the reference substance tetramethylsilane and calculated using the solvent residual peak of the undeuterated solvent; coupling constants are given with 0.5 Hz resolution; assignment of <sup>1</sup>H and <sup>13</sup>C NMR signals was supported by 2-D NMR techniques where necessary. IR: FT/IR IR Affinity®-1 spectrometer (Shimadzu, Düsseldorf, Germany) using ATR technique. Purity by quantitative NMR (qNMR) was performed according to literature using 1,3,5-trimethoxybenzene (Sigma-Aldrich, standard for quantitative NMR, TraceCERT®) as the standard.<sup>2</sup>

## HPLC Analysis

Set 1: Pump: LPG-3400SD, degasser: DG-1210, autosampler: ACC-3000T, UV-detector: VWD-3400RS, interface: DIONEX UltiMate 3000, data acquisition: Chromeleon 7 (Thermo Fisher Scientific).

Set 2: pump: L-7150A, autosampler: L-7200, UV-detector: L-7400, interface: D-7000 I/F, data acquisition: HSM-software (all LaChrom, Merck Hitachi).

### Method 1 (Purity)

Set 1

|                         |                                                                                                                                          |
|-------------------------|------------------------------------------------------------------------------------------------------------------------------------------|
| Column:                 | LiChropher® 60 RP-select B (5 µm), LiChroCART® 250-4 mm cartridge                                                                        |
| Guard column:           | LiChropher® 60 RP-select B (5 µm), LiChroCART® 4-4 mm cartridge (No.: 1.50963.0001), manu-CART® NT cartridge holder                      |
| Flow rate:              | 1.0 mL/min                                                                                                                               |
| Injection volume:       | 5.0 µL; method: cut lead and rear                                                                                                        |
| Detection wavelength    | 210 nm                                                                                                                                   |
| Solvent A:              | Demineralized water + 0.05 % (V/V) trifluoroacetic acid                                                                                  |
| Solvent B:              | Acetonitrile with 0.05 % (V/V) trifluoroacetic acid                                                                                      |
| Gradient elution (% A): | 0 - 4 min: 90 %; 4 - 29 min: gradient from 90 % to 0 %; 29 - 31 min: 0 %; 31 - 31.5 min: gradient from 0 % to 90 %; 31.5 - 40 min: 90 %. |

### Method 2 (preparative separation)

Set 2

|                      |                                         |
|----------------------|-----------------------------------------|
| Column:              | Agilent Prep-C18 (10 µm), 21.2 x 250 mm |
| Flow rate            | 20 mL/min                               |
| Injection Volume     | 400 µL, Method: Full                    |
| Detection Wavelength | 210 nm                                  |
| Run time             | 30 min                                  |
| Solvent              | Acetonitrile:H <sub>2</sub> O: 50:50    |

### Method 3 (preparative separation)

Set 2

|                      |                                         |
|----------------------|-----------------------------------------|
| Column:              | Agilent Prep-C18 (10 µm), 21.2 x 250 mm |
| Guard Column         | -                                       |
| Flow rate            | 20 mL/min                               |
| Injection Volume     | 400 µL, Method: Full                    |
| Detection Wavelength | 210 nm                                  |
| Run time             | 30 min                                  |
| Solvent              | Acetonitrile:H <sub>2</sub> O: 40:60    |

## Synthesis of some educts

### *cis*-2-Phenyltetrahydro-2*H*-pyran-4-ol

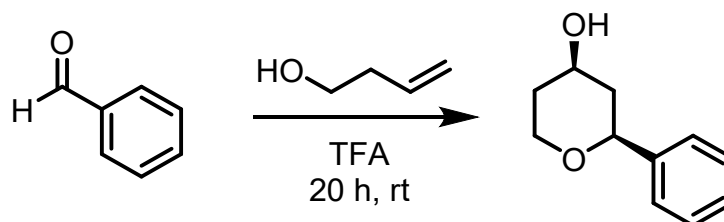

At room temperature under N<sub>2</sub>, trifluoroacetic acid (59.4 mL, 777 mmol, 10.0 eq.) was added to a mixture of benzaldehyde (7.92 mL, 77.7 mmol, 1.00 eq.) and but-3-en-1-ol (10.0 mL, 116 mmol, 1.50 eq.). The reaction mixture was stirred for 20 h at room temperature. Saturated aqueous Na<sub>2</sub>CO<sub>3</sub> solution (250 mL) followed by NaOH (4.00 g) was added to the mixture and the solution was stirred for 72 h at room temperature. The aqueous layer was extracted with CH<sub>2</sub>Cl<sub>2</sub> (4 x 150 mL) and the combined organic layers were washed with water, brine and dried (Na<sub>2</sub>SO<sub>4</sub>). The organic layer was concentrated *in vacuo* and the residue was purified by DCVC (Ø = 6 cm, h = 5 cm, cHex:EtOAc: 85:15 → 50:50).

Yellow oil, *R*<sub>f</sub> = 0.20 (cHex/EtOAc 80:20), yield 12.1 g (87%).

C<sub>11</sub>H<sub>14</sub>O<sub>2</sub> (178.2 g/mol).

Analytical data in accordance with literature.<sup>3</sup>

**<sup>1</sup>H NMR** (600 MHz, CDCl<sub>3</sub>): δ (ppm) = 1.55 (dt, *J* = 12.6/11.2 Hz, 1H, 3-CH<sub>2(ax)</sub>), 1.63 (td, *J* = 12.6/11.0/4.9 Hz, 1H, 5-CH<sub>2(ax)</sub>), 1.96 (ddq, *J* = 12.5/4.2/2.0 Hz, 1H, 5-CH<sub>2(eq)</sub>), 2.18 (ddt, *J* = 12.5/4.4/2.2 Hz, 1H, 3-CH<sub>2(eq)</sub>), 3.58 (ddd, *J* = 12.6/11.9/2.1 Hz, 1H, 6-CH<sub>2(ax)</sub>), 3.93 (tt, *J* = 11.0/4.6 Hz, 1H, 4-CH), 4.17 (ddd, *J* = 11.8/4.9/1.8 Hz, 1H, 6-CH<sub>2(eq)</sub>), 4.31 (dd, *J* = 11.4/2.1 Hz, 1H, 2-CH), 7.25 – 7.29 (m, 1H, 4-*H*<sub>(Ph)</sub>), 7.32 – 7.36 (m, 4H, 2-*H*<sub>(Ph)</sub>, 3-*H*<sub>(Ph)</sub>, 5-*H*<sub>(Ph)</sub>, 6-*H*<sub>(Ph)</sub>). A signal for the OH proton is not observed in the spectrum.

**<sup>13</sup>C NMR** (151 MHz, CDCl<sub>3</sub>): δ (ppm) = 35.6 (C-5), 43.4 (C-3), 66.5 (C-6), 68.6 (C-4), 78.5 (C-2), 126.0 (C-2<sub>(Ph)</sub>, C-6<sub>(Ph)</sub>), 127.8 (C-4<sub>(Ph)</sub>), 128.6 (C-3<sub>(Ph)</sub>, C-5<sub>(Ph)</sub>), 142.0 (C-1<sub>(Ph)</sub>).

**HRMS**: *m/z* = 171.1374, calcd. 171.1380 for C<sub>11</sub>H<sub>15</sub>O<sub>2</sub><sup>+</sup> [M+H]<sup>+</sup>.

**IR** (neat):  $\tilde{\nu}$  [cm<sup>-1</sup>] = 3348 (O-H), 3028 (C-H<sub>aryl</sub>), 2941 (CH<sub>alkyl</sub>).

**Purity** (HPLC): 96.3% (*t*<sub>R</sub> = 12.7 min).

### (*RS*)-1-Oxaspiro[5.5]undecan-4-ol

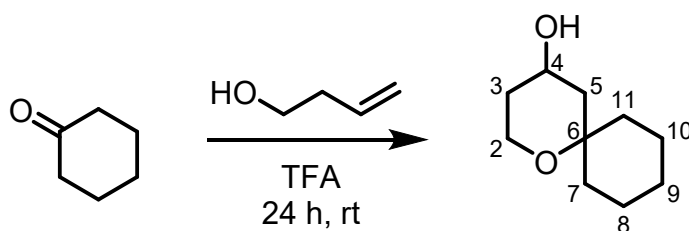

At room temperature under N<sub>2</sub>, trifluoroacetic acid (29.7 mL, 388 mmol, 10.0 eq.) was added to a mixture of cyclohexanone (4.02 mL, 38.8 mmol, 1.00 eq.) and but-3-en-1-ol (5.00 mL, 58.3 mmol, 1.50 eq.). The reaction mixture was stirred for 24 h at room temperature. Saturated aqueous Na<sub>2</sub>CO<sub>3</sub> solution (120 mL) followed by NaOH (4.00 g) was added to the mixture and the solution was stirred for 72 h at room temperature. The aqueous layer was extracted with CH<sub>2</sub>Cl<sub>2</sub> (4 x 150 mL) and the combined organic layers were washed with water, brine and dried (Na<sub>2</sub>SO<sub>4</sub>). The organic layer was concentrated *in vacuo* and the residue was purified by DCVC (Ø = 6 cm, h = 5 cm, cHex:EtOAc: 85:15 → 50:50).

C<sub>10</sub>H<sub>18</sub>O<sub>2</sub> 170.3 (g/mol).

Yellow oil, *R*<sub>f</sub> = 0.23 (cHex/EtOAc 80:20), yield 3.73 g (56%).

Analytical data in accordance with literature.<sup>4</sup>

**<sup>1</sup>H NMR** (400 MHz, CDCl<sub>3</sub>): δ (ppm) = 1.19 (dd, *J* = 12.7/10.8 Hz, 1H, 5-CH<sub>2(ax)</sub>), 1.25 – 1.31 (m, 1H, 9-CH<sub>2(ax)</sub>), 1.31 – 1.36 (m, 1H, 7/11-CH<sub>2(ax)</sub>), 1.36 – 1.42 (m, 2H, 7/11-CH<sub>2(eq)</sub>, 8/10-CH<sub>2(ax)</sub>), 1.43 – 1.48 (m, 2H, 3-CH<sub>2(ax)</sub>, 8/10-CH<sub>2(ax)</sub>), 1.49 – 1.55 (m, 2H, 8/10-CH<sub>2(eq)</sub>, 9-CH<sub>2(eq)</sub>), 1.57 – 1.63 (m, 1H, 7/11-CH<sub>2(ax)</sub>), 1.63 – 1.70 (m, 1H, 8/10-CH<sub>2(eq)</sub>), 1.81 – 1.87 (m, 1H, 7/11-CH<sub>2(eq)</sub>), 1.86 – 1.95 (m, 2H, 3-CH<sub>2(eq)</sub>, 5-CH<sub>2(eq)</sub>), 3.58 (td, *J* = 12.1/2.4 Hz, 1H, 2-CH<sub>2(ax)</sub>), 3.79 (ddd, *J* = 12.1/5.2/2.4 Hz, 1H, 2-CH<sub>2(eq)</sub>), 3.90 – 4.02 (m, 1H, 4-CH). A signal for the OH proton is not observed in the spectrum.

**<sup>13</sup>C NMR** (101 MHz, CDCl<sub>3</sub>): δ (ppm) = 21.6 (C-8/10), 21.9 (C-8/10), 26.2 (C-9), 31.3 (C-7/11), 36.1 (C-3), 39.8 (C-7/11), 45.2 (C-5), 59.2 (C-2), 65.0 (C-4), 73.8 (C-6).

**HRMS**: *m/z* = 171.1374, calcd. 171.1380 for C<sub>10</sub>H<sub>19</sub>O<sub>2</sub><sup>+</sup> [M+H]<sup>+</sup>.

**IR** (neat):  $\tilde{\nu}$  [cm<sup>-1</sup>] = 3356 (O-H), 2930 (CH<sub>alkyl</sub>).

**Purity** (qNMR): 95.4%.

**(RS)-2-Phenyltetrahydropyran-4-one (9)**

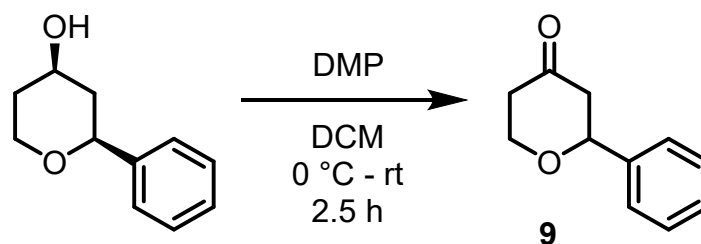

At 0 °C under N<sub>2</sub>, Dess-Martin periodinane (DMP, 13.1 g, 30.9 mmol, 1.10 eq.) was added portionwise to a solution of *cis*-2-phenyltetrahydro-2*H*-pyran-4-ol (5.00 g, 28.1 mmol, 1.00 eq.) in CH<sub>2</sub>Cl<sub>2</sub> (60 mL). The reaction mixture was stirred for 2.5 h while slowly warming up to room temperature. Saturated aqueous Na<sub>2</sub>SO<sub>3</sub> solution (30 mL) and saturated aqueous Na<sub>2</sub>CO<sub>3</sub> (30 mL) were added and the suspension was filtered. The filtrate was extracted with CH<sub>2</sub>Cl<sub>2</sub> (3 x 100 mL). The combined organic layers were washed with aqueous Na<sub>2</sub>CO<sub>3</sub> solution, water and brine and dried (Na<sub>2</sub>SO<sub>4</sub>). The organic layer was concentrated *in vacuo* and the residue was purified by DCVC (Ø = 6 cm, h = 5 cm, cHex/EtOAc: 100:0 → 60:40).

Colorless oil, *R*<sub>f</sub> = 0.41 (cHex/EtOAc 75:25), yield 3.90 g (79%).

C<sub>11</sub>H<sub>12</sub>O<sub>2</sub> (176.2 g/mol).

Analytical data in accordance with literature.<sup>5</sup>

**<sup>1</sup>H NMR** (600 MHz, CDCl<sub>3</sub>): δ (ppm) = 2.44 (ddt, *J* = 14.8/2.9/1.6 Hz, 1H, 5-CH<sub>2</sub>(<sub>eq</sub>)), 2.63 – 2.68 (m, 2H, 3-CH<sub>2</sub>), 2.73 (ddd, *J* = 14.7/12.3/7.4 Hz, 1H, 5-CH<sub>2</sub>(<sub>ax</sub>)), 3.85 (ddd, *J* = 12.4/11.6/2.9 Hz, 1H, 6-CH<sub>2</sub>(<sub>ax</sub>)), 4.44 (ddd, *J* = 11.6/7.4/1.6 Hz, 1H, 6-CH<sub>2</sub>(<sub>eq</sub>)), 4.65 (dd, *J* = 8.8/5.4 Hz, 1H, 2-CH), 7.29 – 7.34 (m, 1H, 4-*H*(<sub>Ph</sub>)), 7.35 – 7.41 (m, 4H, 2-*H*(<sub>Ph</sub>), 3-*H*(<sub>Ph</sub>), 5-*H*(<sub>Ph</sub>), 6-*H*(<sub>Ph</sub>)).

**<sup>13</sup>C NMR** (151 MHz, CDCl<sub>3</sub>): δ (ppm) = 42.3 (C-5), 50.1 (C-3), 66.9 (C-6), 80.0 (C-2), 125.8 (C-2(<sub>Ph</sub>), C-6(<sub>Ph</sub>)), 128.3 (C-4(<sub>Ph</sub>)), 128.8 (C-3(<sub>Ph</sub>), C-5(<sub>Ph</sub>)), 140.7 (C-1(<sub>Ph</sub>)), 206.5 (C-4).

**HRMS**: *m/z* = 177.0910, calcd. 177.0910 for C<sub>11</sub>H<sub>13</sub>O<sub>2</sub><sup>+</sup> [M+H]<sup>+</sup>.

**IR** (neat):  $\tilde{\nu}$  [cm<sup>-1</sup>] = 3024 (C-H<sub>aryl</sub>), 2968 (CH<sub>alkyl</sub>), 1717 (C=O).

**Purity** (HPLC): 96.0% (*t*<sub>R</sub> = 14.9 min).

### 1-Oxaspiro[5.5]undecan-4-one (10)

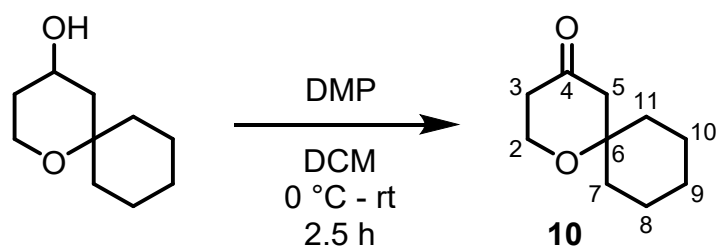

At 0 °C under N<sub>2</sub>, Dess-Martin periodinane (DMP, 7.81 g, 18.4 mmol, 1.10 eq.) was added portionwise to a solution of (RS)-1-oxaspiro[5.5]undecan-4-ol (2.85 g, 16.7 mmol, 1.00 eq.) in CH<sub>2</sub>Cl<sub>2</sub> (40 mL). The reaction mixture was stirred for 3 h while slowly warming up to room temperature. A few drops of water were added and the suspension was filtered off. The filtrate was washed with water (3 x 30 mL), brine and dried (Na<sub>2</sub>SO<sub>4</sub>). The organic layer was concentrated *in vacuo* and the residue was purified by DCVC (Ø = 4 cm, h = 5 cm, cHex/EtoAc: 100:0 → 60:40).

Colorless oil, *R*<sub>f</sub> = 0.50 (cHex/EtOAc 75:25), yield 2.50 g (89%).

C<sub>10</sub>H<sub>16</sub>O<sub>2</sub> (168.2 g/mol).

Analytical data in accordance with literature.<sup>6</sup>

**<sup>1</sup>H NMR** (400 MHz, CDCl<sub>3</sub>): δ (ppm) = 1.20 – 1.29 (m, 1H, 9-CH<sub>2(ax)</sub>), 1.30 – 1.39 (m, 2H, 7-CH<sub>2(ax)</sub>, 11-CH<sub>2(ax)</sub>), 1.39 – 1.49 (m, 2H, 8-CH<sub>2(ax)</sub>, 10-CH<sub>2(ax)</sub>), 1.49 – 1.65 (m, 3H, 8-CH<sub>2(eq)</sub>, 9-CH<sub>2(eq)</sub>, 10-CH<sub>2(eq)</sub>), 1.69 – 1.78 (m, 2H, 7-CH<sub>2(eq)</sub>, 11-CH<sub>2(eq)</sub>), 2.30 – 2.33 (m, 2H, 5-CH<sub>2</sub>), 2.37 – 2.45 (m, 2H, 3-CH<sub>2</sub>), 3.96 (t, *J* = 6.1 Hz, 2H, 2-CH<sub>2</sub>).

**<sup>13</sup>C NMR** (101 MHz, CDCl<sub>3</sub>): δ (ppm) = 21.4 (C-8, C-10), 25.5 (C-9), 35.3 (C-7, C-11), 42.0 (C-3), 53.2 (C-5), 60.1 (C-2), 76.8 (C-6), 208.0 (C-4).

**HRMS**: *m/z* = 169.1223, calcd. 169.1223 for C<sub>10</sub>H<sub>17</sub>O<sub>2</sub><sup>+</sup> [M+H]<sup>+</sup>.

**IR** (neat):  $\tilde{\nu}$  [cm<sup>-1</sup>] = 2930 (CH<sub>alkyl</sub>), 1715 (C=O).

**Purity** (qNMR): 99.6%.



## **N-Benzyl-2-chloroacetamide**

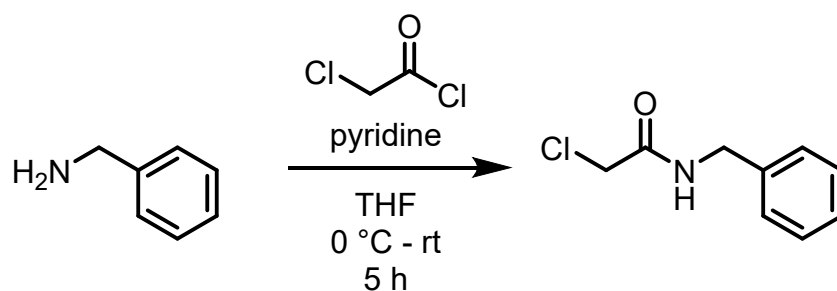

At 0 °C under N<sub>2</sub>, chloroacetyl chloride (7.65 mL, 96.1 mmol, 1.05 eq.) was added slowly to solution of benzylamine (10.0 mL, 91.6 mmol, 1.00 eq.) and pyridine (14.7 mL, 183 mmol, 2.00 eq.) in THF (350 mL). The reaction mixture was stirred for 5 h while slowly warming up to room temperature. Water was added and the aqueous layer was extracted with EtOAc (3 x 200 mL). The combined organic layers were washed with water, brine, dried (Na<sub>2</sub>SO<sub>4</sub>) and concentrated *in vacuo*.

Colorless solid, *R*<sub>f</sub> = 0.10 (cHex/EtOAc 90:10), yield 14.4 g (86%).

C<sub>9</sub>H<sub>10</sub>ClNO (183.6 g/mol).

Analytical data in accordance with literature.<sup>7</sup>

**HRMS:** *m/z* = 184.0510, calcd. 184.0524 for C<sub>9</sub>H<sub>11</sub>ClNO<sup>+</sup> [M+H]<sup>+</sup>.

**Purity** (HPLC): 95.5% (*t*<sub>R</sub> = 14.0 min).

## Diphenyl 1 [(benzylamino)carbonyl]methanephosphonate

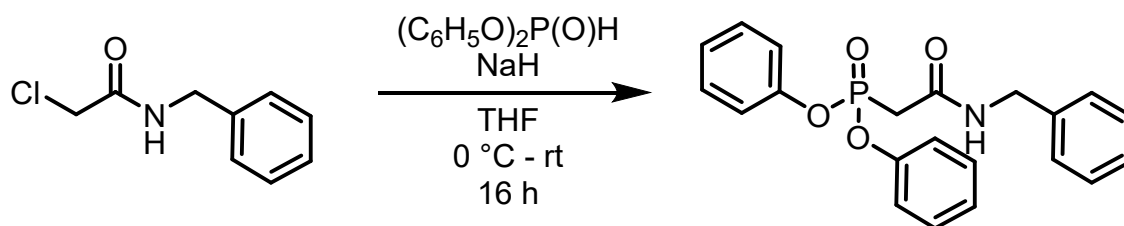

Synthesis procedure was adapted from Kojima et al.<sup>8</sup>

At 0 °C under N<sub>2</sub>, NaH (60% dispersion in mineral oil, 7.07 g, 177 mmol, 3.00 eq.) was suspended in THF (120 mL). Diphenylphosphite (34.0 mL, 177 mmol, 3.00 eq.) was added dropwise and the solution was stirred for 1 h at 0 °C. N-Benzyl-2-chloroacetamide (10.0 g, 59.0 mmol, 1.00 eq.) dissolved in THF (10 mL) was added dropwise to the reaction mixture and the mixture was stirred for 16 h while slowly warming up to room temperature. Aqueous NH<sub>4</sub>Cl solution (1/2 conc., 100 mL) was added and the precipitate was filtered off. The solid was washed with water (3 x 50 mL) and cHex (3 x 50 mL) and dried *in vacuo*. The product was used without further purification.

Colorless solid, mp 145 – 147 °C, *R*<sub>f</sub> = 0.25 (cHex/EtOAc 75:25), yield 16.9 g (78%).

C<sub>21</sub>H<sub>20</sub>NO<sub>4</sub>P (381.4 g/mol).

Analytical data in accordance with literature.<sup>8</sup>

**HRMS:** *m/z* = 382.1211, calcd. 382.1203 for C<sub>21</sub>H<sub>21</sub>NO<sub>4</sub>P [M+H]<sup>+</sup>.

**Purity** (HPLC): 91.7% (*t*<sub>R</sub> = 18.9 min).

## X-ray crystal structure analysis of **8b** (dan10126)

A colorless plate-like specimen of  $C_{25}H_{29}NO_3$ , approximate dimensions 0.030 mm x 0.120 mm x 0.200 mm, was used for the X-ray crystallographic analysis. The X-ray intensity data were measured on a Kappa CCD Bruker APEXII Diffractometer system equipped with a fine-focus sealed tube Cu sealed tube ( $CuK\alpha$ ,  $\lambda = 1.54178 \text{ \AA}$ ) and a graphite monochromator. A total of 1740 frames were collected. The total exposure time was 22.74 hours. The frames were integrated with the Bruker SAINT software package using a wide-frame algorithm. The integration of the data using a monoclinic unit cell yielded a total of 38113 reflections to a maximum  $\theta$  angle of  $66.90^\circ$  ( $0.84 \text{ \AA}$  resolution), of which 4226 were independent (average redundancy 9.019, completeness = 99.8%,  $R_{\text{int}} = 13.27\%$ ,  $R_{\text{sig}} = 7.31\%$ ) and 3057 (72.34%) were greater than  $2\sigma(F^2)$ . The final cell constants of  $a = 27.6191(12) \text{ \AA}$ ,  $b = 9.9208(5) \text{ \AA}$ ,  $c = 20.1969(8) \text{ \AA}$ ,  $\beta = 120.649(2)^\circ$ , volume =  $4761.0(4) \text{ \AA}^3$ , are based upon the refinement of the XYZ-centroids of 4740 reflections above  $20 \sigma(I)$  with  $7.441^\circ < 2\theta < 132.7^\circ$ . Data were corrected for absorption effects using the Multi-Scan method (SADABS). The ratio of minimum to maximum apparent transmission was 0.857. The calculated minimum and maximum transmission coefficients (based on crystal size) are 0.8960 and 0.9830. The structure was solved and refined using the Bruker SHELXTL Software Package, using the space group  $C2/c$ , with  $Z = 8$  for the formula unit,  $C_{25}H_{29}NO_3$ . The final anisotropic full-matrix least-squares refinement on  $F^2$  with 263 variables converged at  $R1 = 5.00\%$ , for the observed data and  $wR2 = 12.57\%$  for all data. The goodness-of-fit was 1.033. The largest peak in the final difference electron density synthesis was  $0.244 \text{ e}/\text{\AA}^3$  and the largest hole was  $-0.272 \text{ e}/\text{\AA}^3$  with an RMS deviation of  $0.052 \text{ e}/\text{\AA}^3$ . On the basis of the final model, the calculated density was  $1.092 \text{ g}/\text{cm}^3$  and  $F(000)$ , 1680 e<sup>-</sup>. CCDC Nr.: 2279510.

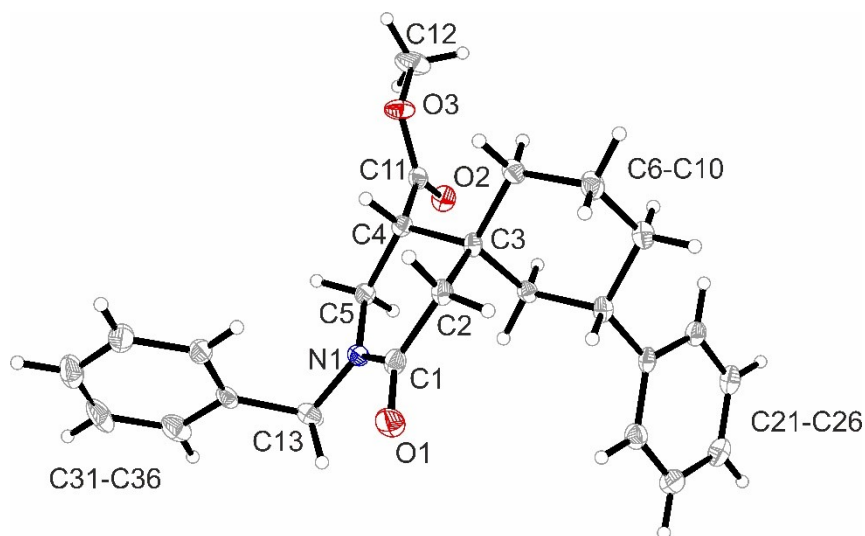

Figure S1: Crystal structure of compound **8b**. Thermal ellipsoids are set at 50% probability.

**Table 1. Sample and crystal data for dan10126.**

|                        |                                                 |                            |
|------------------------|-------------------------------------------------|----------------------------|
| Identification code    | dan10126                                        |                            |
| Chemical formula       | C <sub>25</sub> H <sub>29</sub> NO <sub>3</sub> |                            |
| Formula weight         | 391.49 g/mol                                    |                            |
| Temperature            | 100(2) K                                        |                            |
| Wavelength             | 1.54178 Å                                       |                            |
| Crystal size           | 0.030 x 0.120 x 0.200 mm                        |                            |
| Crystal habit          | colorless plate                                 |                            |
| Crystal system         | monoclinic                                      |                            |
| Space group            | C 1 2/c 1                                       |                            |
| Unit cell dimensions   | a = 27.6191(12) Å                               | $\alpha = 90^\circ$        |
|                        | b = 9.9208(5) Å                                 | $\beta = 120.649(2)^\circ$ |
|                        | c = 20.1969(8) Å                                | $\gamma = 90^\circ$        |
| Volume                 | 4761.0(4) Å <sup>3</sup>                        |                            |
| Z                      | 8                                               |                            |
| Density (calculated)   | 1.092 g/cm <sup>3</sup>                         |                            |
| Absorption coefficient | 0.563 mm <sup>-1</sup>                          |                            |
| F(000)                 | 1680                                            |                            |

**Table 2. Data collection and structure refinement for dan10126.**

|                                     |                                                                                                                               |                           |
|-------------------------------------|-------------------------------------------------------------------------------------------------------------------------------|---------------------------|
| Diffractometer                      | Kappa CCD Bruker APEXII Diffractometer                                                                                        |                           |
| Radiation source                    | fine-focus sealed tube Cu sealed tube (CuK $\alpha$ , $\lambda = 1.54178$ Å)                                                  |                           |
| Theta range for data collection     | 3.72 to 66.90°                                                                                                                |                           |
| Index ranges                        | -32 ≤ h ≤ 32, -11 ≤ k ≤ 11, -24 ≤ l ≤ 24                                                                                      |                           |
| Reflections collected               | 38113                                                                                                                         |                           |
| Independent reflections             | 4226 [R(int) = 0.1327]                                                                                                        |                           |
| Coverage of independent reflections | 99.8%                                                                                                                         |                           |
| Absorption correction               | Multi-Scan                                                                                                                    |                           |
| Max. and min. transmission          | 0.9830 and 0.8960                                                                                                             |                           |
| Structure solution technique        | direct methods                                                                                                                |                           |
| Structure solution program          | SHELXT 2018/2 (Sheldrick, 2018)                                                                                               |                           |
| Refinement method                   | Full-matrix least-squares on F <sup>2</sup>                                                                                   |                           |
| Refinement program                  | SHELXL-2018/3 (Sheldrick, 2018)                                                                                               |                           |
| Function minimized                  | $\Sigma w(F_o^2 - F_c^2)^2$                                                                                                   |                           |
| Data / restraints / parameters      | 4226 / 0 / 263                                                                                                                |                           |
| Goodness-of-fit on F <sup>2</sup>   | 1.033                                                                                                                         |                           |
| Final R indices                     | 3057 data; I > 2 $\sigma$ (I)                                                                                                 | R1 = 0.0500, wR2 = 0.1130 |
|                                     | all data                                                                                                                      | R1 = 0.0750, wR2 = 0.1257 |
| Weighting scheme                    | w = 1/[ $\sigma^2(F_o^2) + (0.0335P)^2 + 4.6723P$ ] where P = (F <sub>o</sub> <sup>2</sup> + 2F <sub>c</sub> <sup>2</sup> )/3 |                           |
| Largest diff. peak and hole         | 0.244 and -0.272 eÅ <sup>-3</sup>                                                                                             |                           |
| R.M.S. deviation from mean          | 0.052 eÅ <sup>-3</sup>                                                                                                        |                           |

**Table 3. Bond lengths (Å) for dan10126.**

|          |          |          |          |
|----------|----------|----------|----------|
| N1-C1    | 1.351(3) | N1-C13   | 1.458(3) |
| N1-C5    | 1.460(3) | O1-C1    | 1.239(2) |
| O2-C11   | 1.209(2) | O3-C11   | 1.340(2) |
| O3-C12   | 1.455(3) | C1-C2    | 1.509(3) |
| C2-C3    | 1.541(3) | C2-H2A   | 0.99     |
| C2-H2B   | 0.99     | C3-C10   | 1.536(3) |
| C3-C6    | 1.543(3) | C3-C4    | 1.551(3) |
| C4-C11   | 1.516(3) | C4-C5    | 1.520(3) |
| C4-H4    | 1.0      | C5-H5A   | 0.99     |
| C5-H5B   | 0.99     | C6-C7    | 1.544(3) |
| C6-H6A   | 0.99     | C6-H6B   | 0.99     |
| C7-C21   | 1.516(3) | C7-C8    | 1.526(3) |
| C7-H7    | 1.0      | C8-C9    | 1.531(3) |
| C8-H8A   | 0.99     | C8-H8B   | 0.99     |
| C9-C10   | 1.532(3) | C9-H9A   | 0.99     |
| C9-H9B   | 0.99     | C10-H10A | 0.99     |
| C10-H10B | 0.99     | C12-H12A | 0.98     |
| C12-H12B | 0.98     | C12-H12C | 0.98     |
| C13-C31  | 1.518(3) | C13-H13A | 0.99     |
| C13-H13B | 0.99     | C21-C26  | 1.392(3) |
| C21-C22  | 1.394(3) | C22-C23  | 1.386(3) |
| C22-H22  | 0.95     | C23-C24  | 1.386(3) |
| C23-H23  | 0.95     | C24-C25  | 1.380(3) |
| C24-H24  | 0.95     | C25-C26  | 1.390(3) |
| C25-H25  | 0.95     | C26-H26  | 0.95     |
| C31-C32  | 1.388(3) | C31-C36  | 1.398(3) |
| C32-C33  | 1.392(3) | C32-H32  | 0.95     |
| C33-C34  | 1.373(4) | C33-H33  | 0.95     |
| C34-C35  | 1.375(4) | C34-H34  | 0.95     |
| C35-C36  | 1.403(4) | C35-H35  | 0.95     |
| C36-H36  | 0.95     |          |          |

**Table 4. Bond angles (°) for dan10126.**

|            |            |            |            |
|------------|------------|------------|------------|
| C1-N1-C13  | 120.17(17) | C1-N1-C5   | 125.17(17) |
| C13-N1-C5  | 114.66(16) | C11-O3-C12 | 115.93(18) |
| O1-C1-N1   | 121.96(19) | O1-C1-C2   | 120.40(19) |
| N1-C1-C2   | 117.61(17) | C1-C2-C3   | 114.83(16) |
| C1-C2-H2A  | 108.6      | C3-C2-H2A  | 108.6      |
| C1-C2-H2B  | 108.6      | C3-C2-H2B  | 108.6      |
| H2A-C2-H2B | 107.5      | C10-C3-C2  | 110.57(16) |
| C10-C3-C6  | 109.11(16) | C2-C3-C6   | 110.50(16) |
| C10-C3-C4  | 110.68(16) | C2-C3-C4   | 103.54(15) |
| C6-C3-C4   | 112.36(16) | C11-C4-C5  | 108.24(16) |

|               |            |               |            |
|---------------|------------|---------------|------------|
| C11-C4-C3     | 113.13(16) | C5-C4-C3      | 111.53(16) |
| C11-C4-H4     | 107.9      | C5-C4-H4      | 107.9      |
| C3-C4-H4      | 107.9      | N1-C5-C4      | 113.66(16) |
| N1-C5-H5A     | 108.8      | C4-C5-H5A     | 108.8      |
| N1-C5-H5B     | 108.8      | C4-C5-H5B     | 108.8      |
| H5A-C5-H5B    | 107.7      | C3-C6-C7      | 112.65(16) |
| C3-C6-H6A     | 109.1      | C7-C6-H6A     | 109.1      |
| C3-C6-H6B     | 109.1      | C7-C6-H6B     | 109.1      |
| H6A-C6-H6B    | 107.8      | C21-C7-C8     | 115.28(17) |
| C21-C7-C6     | 109.69(16) | C8-C7-C6      | 110.19(16) |
| C21-C7-H7     | 107.1      | C8-C7-H7      | 107.1      |
| C6-C7-H7      | 107.1      | C7-C8-C9      | 110.27(17) |
| C7-C8-H8A     | 109.6      | C9-C8-H8A     | 109.6      |
| C7-C8-H8B     | 109.6      | C9-C8-H8B     | 109.6      |
| H8A-C8-H8B    | 108.1      | C8-C9-C10     | 111.29(17) |
| C8-C9-H9A     | 109.4      | C10-C9-H9A    | 109.4      |
| C8-C9-H9B     | 109.4      | C10-C9-H9B    | 109.4      |
| H9A-C9-H9B    | 108.0      | C9-C10-C3     | 113.33(17) |
| C9-C10-H10A   | 108.9      | C3-C10-H10A   | 108.9      |
| C9-C10-H10B   | 108.9      | C3-C10-H10B   | 108.9      |
| H10A-C10-H10B | 107.7      | O2-C11-O3     | 124.01(19) |
| O2-C11-C4     | 125.05(18) | O3-C11-C4     | 110.94(17) |
| O3-C12-H12A   | 109.5      | O3-C12-H12B   | 109.5      |
| H12A-C12-H12B | 109.5      | O3-C12-H12C   | 109.5      |
| H12A-C12-H12C | 109.5      | H12B-C12-H12C | 109.5      |
| N1-C13-C31    | 112.45(16) | N1-C13-H13A   | 109.1      |
| C31-C13-H13A  | 109.1      | N1-C13-H13B   | 109.1      |
| C31-C13-H13B  | 109.1      | H13A-C13-H13B | 107.8      |
| C26-C21-C22   | 118.29(18) | C26-C21-C7    | 123.05(19) |
| C22-C21-C7    | 118.65(18) | C23-C22-C21   | 121.36(19) |
| C23-C22-H22   | 119.3      | C21-C22-H22   | 119.3      |
| C24-C23-C22   | 119.7(2)   | C24-C23-H23   | 120.2      |
| C22-C23-H23   | 120.2      | C25-C24-C23   | 119.6(2)   |
| C25-C24-H24   | 120.2      | C23-C24-H24   | 120.2      |
| C24-C25-C26   | 120.7(2)   | C24-C25-H25   | 119.6      |
| C26-C25-H25   | 119.6      | C25-C26-C21   | 120.3(2)   |
| C25-C26-H26   | 119.8      | C21-C26-H26   | 119.8      |
| C32-C31-C36   | 118.3(2)   | C32-C31-C13   | 122.00(18) |
| C36-C31-C13   | 119.7(2)   | C31-C32-C33   | 121.0(2)   |
| C31-C32-H32   | 119.5      | C33-C32-H32   | 119.5      |
| C34-C33-C32   | 120.3(2)   | C34-C33-H33   | 119.8      |
| C32-C33-H33   | 119.8      | C33-C34-C35   | 119.9(2)   |
| C33-C34-H34   | 120.0      | C35-C34-H34   | 120.0      |
| C34-C35-C36   | 120.3(2)   | C34-C35-H35   | 119.9      |
| C36-C35-H35   | 119.9      | C31-C36-C35   | 120.2(2)   |

**Table 5. Torsion angles (°) for dan10126.**

|                 |             |                 |             |
|-----------------|-------------|-----------------|-------------|
| C13-N1-C1-O1    | 3.7(3)      | C5-N1-C1-O1     | -175.87(19) |
| C13-N1-C1-C2    | -174.13(17) | C5-N1-C1-C2     | 6.3(3)      |
| O1-C1-C2-C3     | 152.38(19)  | N1-C1-C2-C3     | -29.7(3)    |
| C1-C2-C3-C10    | 174.56(17)  | C1-C2-C3-C6     | -64.5(2)    |
| C1-C2-C3-C4     | 56.0(2)     | C10-C3-C4-C11   | 56.5(2)     |
| C2-C3-C4-C11    | 175.02(16)  | C6-C3-C4-C11    | -65.7(2)    |
| C10-C3-C4-C5    | 178.82(16)  | C2-C3-C4-C5     | -62.67(19)  |
| C6-C3-C4-C5     | 56.6(2)     | C1-N1-C5-C4     | -13.5(3)    |
| C13-N1-C5-C4    | 166.90(16)  | C11-C4-C5-N1    | 168.46(16)  |
| C3-C4-C5-N1     | 43.4(2)     | C10-C3-C6-C7    | 54.0(2)     |
| C2-C3-C6-C7     | -67.8(2)    | C4-C3-C6-C7     | 177.12(15)  |
| C3-C6-C7-C21    | 174.46(16)  | C3-C6-C7-C8     | -57.6(2)    |
| C21-C7-C8-C9    | -177.63(17) | C6-C7-C8-C9     | 57.6(2)     |
| C7-C8-C9-C10    | -56.6(2)    | C8-C9-C10-C3    | 55.2(2)     |
| C2-C3-C10-C9    | 69.0(2)     | C6-C3-C10-C9    | -52.8(2)    |
| C4-C3-C10-C9    | -176.89(16) | C12-O3-C11-O2   | 0.3(3)      |
| C12-O3-C11-C4   | 179.63(18)  | C5-C4-C11-O2    | -46.5(3)    |
| C3-C4-C11-O2    | 77.6(3)     | C5-C4-C11-O3    | 134.24(17)  |
| C3-C4-C11-O3    | -101.63(19) | C1-N1-C13-C31   | 98.4(2)     |
| C5-N1-C13-C31   | -82.0(2)    | C8-C7-C21-C26   | -31.8(3)    |
| C6-C7-C21-C26   | 93.2(2)     | C8-C7-C21-C22   | 149.38(19)  |
| C6-C7-C21-C22   | -85.6(2)    | C26-C21-C22-C23 | -0.1(3)     |
| C7-C21-C22-C23  | 178.7(2)    | C21-C22-C23-C24 | 0.3(3)      |
| C22-C23-C24-C25 | -0.3(3)     | C23-C24-C25-C26 | 0.1(3)      |
| C24-C25-C26-C21 | 0.1(3)      | C22-C21-C26-C25 | -0.1(3)     |
| C7-C21-C26-C25  | -178.90(19) | N1-C13-C31-C32  | -27.3(3)    |
| N1-C13-C31-C36  | 154.79(19)  | C36-C31-C32-C33 | 0.4(3)      |
| C13-C31-C32-C33 | -177.54(19) | C31-C32-C33-C34 | -0.3(3)     |
| C32-C33-C34-C35 | -0.1(4)     | C33-C34-C35-C36 | 0.4(4)      |
| C32-C31-C36-C35 | -0.2(3)     | C13-C31-C36-C35 | 177.8(2)    |
| C34-C35-C36-C31 | -0.2(3)     |                 |             |

## **Receptor binding studies**

### **Materials**

Guinea pig brains, rat brains and rat livers were commercially available (Harlan-Winkelmann, Borchon, Germany). The recombinant L(tk-) cells stably expressing the GluN2B receptor were obtained from Prof. Dr. Dieter Steinhilber (Frankfurt, Germany). Homogenizers: Elvehjem Potter (B. Braun Biotech International, Melsungen, Germany) and Soniprep® 150 (MSE, London, UK). Centrifuges: Cooling centrifuge model Eppendorf 5427R (Eppendorf, Hamburg, Germany) and High-speed cooling centrifuge model Sorvall® RC-5C plus (Thermo Fisher Scientific, Langenselbold, Germany). Multiplates: standard 96 well multiplates (Diagonal, Muenster, Germany). Shaker: self-made device with adjustable temperature and tumbling speed (scientific workshop of the institute). Harvester: MicroBeta® FilterMate 96 Harvester. Filter: Printed Filtermat Typ A and B. Scintillator: Meltilex® (Typ A or B) solid state scintillator. Scintillation analyzer: MicroBeta® Trilux (all Perkin Elmer LAS, Rodgau-Jügesheim, Germany).

### **Preparation of membrane homogenates from guinea pig brain**

5 guinea pig brains were homogenized with the potter (500-800 rpm, 10 up and down strokes) in 6 volumes of cold 0.32 M sucrose. The suspension was centrifuged at 1,200 x g for 10 min at 4 °C. The supernatant was separated and centrifuged at 23,500 x g for 20 min at 4 °C. The pellet was resuspended in 5-6 volumes of buffer (50 mM TRIS, pH 7.4) and centrifuged again at 23,500 x g (20 min, 4 °C). This procedure was repeated twice. The final pellet was resuspended in 5-6 volumes of buffer and frozen (-80 °C) in 1.5 mL portions containing about 1.5 mg protein/mL.

### **Preparation of membrane homogenates from rat brain**

5 rat brains (species: Sprague Dawley rats) were homogenized with the potter (500-800 rpm, 10 up and down strokes) in 6 volumes of cold 0.32 M sucrose. The suspension was centrifuged at 1,200 x g for 10 min at 4 °C. The supernatant was separated and centrifuged at 23,500 x g for 20 min at 4 °C. The pellet was resuspended in 5-6 volumes of buffer (50 mM TRIS, pH 7.4) and centrifuged again at 23,500 x g (20 min, 4 °C). This procedure was repeated twice. The final pellet was resuspended in 5-6 volumes of buffer and frozen (-80 °C) in 1.5 mL portions containing about 1.5 mg protein/mL.



## **Preparation of membrane homogenates from rat liver**

Two rat livers were cut into small pieces and homogenized with the potter (500-800 rpm, 10 up and down strokes) in 6 volumes of cold 0.32 M sucrose. The suspension was centrifuged at 1,200 x g for 10 min at 4 °C. The supernatant was separated and centrifuged at 31,000 x g for 20 min at 4 °C. The pellet was resuspended in 5-6 volumes of buffer (50 mM TRIS, pH 8.0) and incubated at rt for 30 min. After the incubation, the suspension was centrifuged again at 31,000 x g for 20 min at 4 °C. The final pellet was resuspended in 5-6 volumes of buffer and stored at -80 °C in 1.5 mL portions containing about 2 mg protein/mL.

## **Cell culture and preparation of membrane homogenates from GluN2B cells**

Mouse L(tk-) cells stably transfected with the dexamethasone-inducible eukaryotic expression vectors pMSG GluN1a, pMSG GluN2B (1:5 ratio) were grown in Modified Earl's Medium (MEM) containing 10 % of standardized FBS Superior (Biochrom AG, Berlin, Germany). The expression of the NMDA receptor at the cell surface was induced after the cell density of the adherent growing cells had reached approximately 90 % of confluency. For the induction, the original growth medium was replaced by growth medium containing 4 µM dexamethasone and 4 µM ketamine (final concentration). After 24 h, the cells were rinsed with phosphate buffered saline solution (PBS, Biochrom AG, Berlin, Germany), harvested by mechanical detachment and pelleted (10 min, 1,200 x g).

For the binding assay, the cell pellet was resuspended in PBS solution and the number of cells was determined using a Scepter® cell counter (MERCK Millipore, Darmstadt, Germany). Subsequently, the cells were lysed by sonication (4 °C, 6 x 10 s cycles with breaks of 10 s). The resulting cell fragments were centrifuged with a high performance cool centrifuge (23,500 x g, 4 °C). The supernatant was discarded and the pellet was resuspended in a defined volume of PBS yielding cell fragments of approximately 500,000 cells/mL. The suspension of membrane homogenates was sonicated again (4 °C, 2 x 10 s cycles with a break of 10 s) and stored at -80 °C.

## **Protein determination**

The protein concentration was determined by the method of Bradford,<sup>9</sup> modified by Stoscheck.<sup>10</sup> The Bradford solution was prepared by dissolving 5 mg of Coomassie Brilliant Blue G 250 in 2.5 mL of EtOH (95 %, v/v). 10 mL deionized H<sub>2</sub>O and 5 mL phosphoric acid (85 %, m/v) were added to this solution, the mixture was stirred and filled to a total volume of 50 mL with deionized water. The calibration was carried out using bovine serum albumin

as a standard in 9 concentrations (0.1, 0.2, 0.4, 0.6, 0.8, 1.0, 1.5, 2.0 and 4.0 mg /mL). In a 96 well standard multiplate, 10  $\mu$ L of the calibration solution or 10  $\mu$ L of the membrane receptor preparation were mixed with 190  $\mu$ L of the Bradford solution, respectively. After 5 min, the UV absorption of the protein-dye complex at  $\lambda = 595$  nm was measured with a plate reader (Tecan Genios<sup>®</sup>, Tecan, Crailsheim, Germany).

### **General procedures for the binding assays**

The test compound solutions were prepared by dissolving approximately 10  $\mu$ mol (usually 2-4 mg) of test compound in DMSO so that a 10 mM stock solution was obtained. To obtain the required test solutions for the assay, the DMSO stock solution was diluted with the respective assay buffer. The filtermats were presoaked in 0.5 % aqueous polyethylenimine solution for 2 h at rt before use. All binding experiments were carried out in duplicates in the 96 well multiplates. The concentrations given are the final concentration in the assay. Generally, the assays were performed by addition of 50  $\mu$ L of the respective assay buffer, 50  $\mu$ L of test compound solution in various concentrations ( $10^{-5}$ ,  $10^{-6}$ ,  $10^{-7}$ ,  $10^{-8}$ ,  $10^{-9}$  and  $10^{-10}$  mol/L), 50  $\mu$ L of the corresponding radioligand solution and 50  $\mu$ L of the respective receptor preparation into each well of the multiplate (total volume 200  $\mu$ L). The receptor preparation was always added last. During the incubation, the multiplates were shaken at a speed of 500-600 rpm at the specified temperature. Unless otherwise noted, the assays were terminated after 120 min by rapid filtration using the harvester. During the filtration, each well was washed five times with 300  $\mu$ L of water. Subsequently, the filtermats were dried at 95 °C. The solid scintillator was melted on the dried filtermats at a temperature of 95 °C for 5 min. After solidifying of the scintillator at rt, the trapped radioactivity in the filtermats was measured with the scintillation analyzer. Each position on the filtermat corresponding to one well of the multiplate was measured for 5 min with the [<sup>3</sup>H]-counting protocol. The overall counting efficiency was 20 %. The  $IC_{50}$  values were calculated with the program GraphPad Prism<sup>®</sup> 3.0 (GraphPad Software, San Diego, CA, USA) by non-linear regression analysis. Subsequently, the  $IC_{50}$  values were transformed into  $K_i$  values using the equation of Cheng and Prusoff.<sup>11</sup> The  $K_i$  values are given as mean value  $\pm$  SEM from three independent experiments. For test compounds showing low affinity ( $K_i > 100$  nM), only a single experiment was performed.

## **Performance of the binding assays**

### **$\sigma_2$ receptor assay**

The assays were performed with the radioligand [ $^3\text{H}$ ]di-*o*-tolyguanidine (specific activity 50 Ci/mmol; ARC, St. Louis, MO, USA). The thawed rat liver membrane preparation (about 100  $\mu\text{g}$  protein) was incubated with various concentrations of the test compound, 3 nM [ $^3\text{H}$ ]di-*o*-tolyguanidine and buffer containing (+)-pentazocine (500 nM (+)-pentazocine in TRIS buffer (50 mM TRIS, pH 8.0)) at rt. The non-specific binding was determined with 10  $\mu\text{M}$  non-labeled di-*o*-tolyguanidine. The  $K_d$  value of di-*o*-tolyguanidine is 17.9 nM.<sup>12</sup>

### **Ifenprodil binding site of GluN2B subunit containing NMDA receptors**

The competitive binding assay was performed with the radioligand [ $^3\text{H}$ ]ifenprodil (60 Ci/mmol; BIOTREND, Cologne, Germany). The thawed cell membrane preparation from the transfected L(tk-) cells (about 20  $\mu\text{g}$  protein) was incubated with various concentrations of test compounds, 5 nM [ $^3\text{H}$ ]ifenprodil, and TRIS/EDTA-buffer (5 mM TRIS/1 mM EDTA, pH 7.5) at 37 °C. The non-specific binding was determined with 10  $\mu\text{M}$  unlabeled ifenprodil. The  $K_d$  value of ifenprodil is 7.6 nM.<sup>13</sup>

### **KOR assay**

The assay was performed with the radioligand [ $^3\text{H}$ ]U-69,593 (55 Ci/mmol, BIOTREND). The thawed guinea pig brain membrane preparation (about 100  $\mu\text{g}$  of the protein) was incubated with various concentrations of test compounds, 1 nM [ $^3\text{H}$ ]U-69,593, and TRIS-MgCl<sub>2</sub>-buffer (50 mM TRIS, 8 mM MgCl<sub>2</sub>, pH 7.4) at 37 °C. The non-specific binding was determined with 10  $\mu\text{M}$  unlabeled U-69,593. The  $K_d$  value of U-69,593 is 0.69 nM.

### **MOR assay**

The assay was performed with the radioligand [ $^3\text{H}$ ]DAMGO (51 Ci/mmol, Perkin Elmer). The thawed guinea pig brain membrane preparation (about 100  $\mu\text{g}$  of the protein) was incubated with various concentrations of test compounds, 3 nM [ $^3\text{H}$ ]DAMGO, and TRIS-MgCl<sub>2</sub>-buffer (50 mM TRIS, 8 mM MgCl<sub>2</sub>, pH 7.4) at 37 °C. The non-specific binding was determined with 10  $\mu\text{M}$  unlabeled naloxone. The  $K_d$  value of DAMGO is 0.57 nM.

### **DOR assay**

The assay was performed with the radioligand [<sup>3</sup>H]DPDPE (69 Ci/mmol, BIOTREND). The thawed rat brain membrane preparation (about 75 µg of the protein) was incubated with various concentrations of test compounds, 3 nM [<sup>3</sup>H]DPDPE, and TRIS-MgCl<sub>2</sub>-buffer (50 mM TRIS, 8 mM MgCl<sub>2</sub>, pH 7.4) supplemented with SIGMAFAST® protease inhibitor mix (Sigma Aldrich Biochemicals, Hamburg, Germany; 1 tablet dissolved in 100 mL of buffer) at 37 °C. The non-specific binding was determined with 10 µM unlabeled morphine. The *K<sub>d</sub>* value of DPDPE is 0.65 nM.

## Quantum chemical Calculations

All calculations were performed using the GAUSSIAN 16, B.01 package of programs.<sup>14</sup> The structures were fully optimized first using the B3LYP/6-31G(d)<sup>15,16</sup> +GD3BJ<sup>17,18</sup> method, then the TPSSSTPSS/def2tzvp<sup>19</sup> + GD3BJ, then the PBE1PBE/def2tzvp<sup>20–24</sup> +GD3BJ methods and finally the wB97X-D/def2tzvp functional<sup>25</sup> all including the PCM-solvent sphere for dichloroethane.<sup>26</sup> Zeropoint vibrational energies and free enthalpy contributions were determined analytically.

**Table 6:** Total energies ( $E_{\text{tot}}$ ) and Gibbs free energies ( $G_{298}$ ) [a.u.], of the cycloadducts, respectively, the respective transition states and the relative energies with respect to the sum of the two educts **G** and methylacrylate (last column) [kcal/mol].

| Species                 | $E_{\text{tot}}$ [a.u.] | $E_{\text{rel}}$<br>[kcal/mol] | $G_{298}$ [a.u.] | $E_{\text{rel}}$<br>[kcal/mol] |
|-------------------------|-------------------------|--------------------------------|------------------|--------------------------------|
| <b>B3LYP</b>            |                         |                                |                  |                                |
| 1-Azabutadiene <b>G</b> | -890,77207              |                                | -890,49023       |                                |
| Methylacrylate          | -306,49495              |                                | -306,43000       |                                |
| Sum                     | -1197,26702             | 0.00                           | -1196,92023      | 0.00                           |
| vdW-Complex             | -1197,27933             | -7,72                          | -1196,91210      | 5,10                           |
| TS_Diels-Alder          | -1197,25047             | 10,39                          | -1196,87774      | 26,66                          |
| Min H                   | -1197,31187             | -28,14                         | -1196,93240      | -7,64                          |
| <b>TPSSSTPSS</b>        |                         |                                |                  |                                |
| 1-Azabutadiene <b>G</b> | -891,07243              |                                | -890,79747       |                                |
| Methylacrylate          | -306,65378              |                                | -306,59087       |                                |
| Sum                     | -1197,72621             | 0,00                           | -1197,38834      | 0,00                           |
| vdW-Complex             | -1197,73283             | -4,16                          | -1197,37728      | 6,94                           |
| TS-Diels-Alder          | -1197,70974             | 10,33                          | -1197,34634      | 26,35                          |
| Min-H                   | -1197,76003             | -21,22                         | -1197,39077      | -1,52                          |
| <b>PBE1PBE</b>          |                         |                                |                  |                                |
| 1-Azabutadiene <b>G</b> | -890,09425              |                                | -889,81289       |                                |
| Methylacrylate          | -306,25109              |                                | -306,18608       |                                |
| Sum                     | -1.196,34534            | 0,00                           | -1.195,99897     | 0,00                           |
| vdW-Complex             | -1.196,35286            | -4,72                          | -1.195,98836     | 6,66                           |
| TS-C..N                 | -1.196,32884            | 10,36                          | -1.196,32884     | 25,88                          |
| Dipolar Interm.         | -1.196,34153            | 2,39                           | -1.195,96832     | 19,23                          |
| TS-C..C                 | -1.196,33480            | 6,61                           | -1.195,96110     | 23,76                          |
| Min-H                   | -1.196,39806            | -33,08                         | -1.196,01899     | -12,56                         |

|                         |              |        |              |       |
|-------------------------|--------------|--------|--------------|-------|
| <b>wB97X-D</b>          |              |        |              |       |
| <b>1-Azabutadiene G</b> | -890,72202   |        | -890,43765   |       |
| <b>Methylacrylate</b>   | -306,49442   |        | -306,42899   |       |
| <b>Sum</b>              | -1.197,21644 | 0,00   | -1.196,86664 | 0,00  |
| <b>vdW-Complex</b>      | -1.197,22267 | -3,91  | -1.196,85295 | 8,59  |
| <b>TS-C..N</b>          | -1.197,19509 | 13,14  | -1.196,82024 | 29,12 |
| <b>Dipolar-Interm</b>   | -1.197,20674 | 6,09   | -1.196,83114 | 22,28 |
| <b>TS-C..C</b>          | -1.197,19628 | 12,65  | -1.196,81951 | 29,57 |
| <b>Min-H</b>            | -1.197,26300 | -29,22 | -1.196,88153 | -9,34 |

## Gaussian Archive Entries

(Total energies (a.u.), number of imaginary frequencies (for transition states: imaginary frequencies), coordinates)

### B3LYP

#### 2-Silyloxy-1-azabutadiene G

HF=-890.772072 a.u. (0)

```
1\1\GINC-R03N37\FOpt\RB3LYP\6-31G(d,p)\C12H23N1O1Si1\WURTHWE\27-Apr-2023\0\#\
b3lyp/6-31G(d,p) opt=readfc geom=check guess=read freq pop=nbo emp=gd3bj
scrfl=(solvent=dichloroethane)\2-Silyloxy-1-azabutadiene G \0,1\
C,-0.35345846,-0.0776504467,-0.0972121299\C,-0.1447082285,0.0826411484,1.3861496218\
C,1.2913696466,0.3382276772,1.7698981928\C,2.1 935686583,-0.7953344801,1.2374128303\
C,2.00936621,-0.9924206544,-0.272641556\C,0.5356655108,-1.2180628473,-0.6338610988\
C,-1.1008743936,-0.0354039187,2.323856141\C,-2.531688712,-0.3170043677,2.1001001404\
O,-3.3898562216,0.3917357332,2.9012447422\N,-2.9514603609,-1.1921532534,1.2722964553\
C,-4.3961061371,-1.3434306882,1.1340527506\H,1.3946240128,0.4376766707,2.8550390423\
H,1.6207346959,1.2859519939,1.3197084612\H,1.9352796216,-1.7251710424,1.7603510858\
H,3.2408924161,-0.5758391894,1.472589327\H,2.6187866317,-1.8346318346,-0.6196408934\
H,2.3753699845,-0.1000209018,-0.7992170984\H,0.1891470366,-2.1643014053,-0.1991982353\
H,0.4150071262,-1.300806495,-1.7196729192\H,-1.4014542898,-0.2664053259,-0.3265562192\
H,-0.0508096813,0.8582717939,-0.5901333703\H,-0.8323129553,0.1309057389,3.3649586004\
Si,-3.3907651473,2.0846732236,3.1208556017\H,-4.6060112685,-2.047967444,0.3252916482\
H,-4.8956552517,-0.3924819027,0.9080876886\H,-4.8525319767,-1.7311022766,2.0537391165\
C,-5.1087437088,2.4428806392,3.7744898599\C,-2.0876399592,2.601518729,4.3701956973\
C,-3.0853026071,2.8851627928,1.451486051\H,-3.1238428756,3.9767120463,1.5326909176\
H,-2.1009050582,2.6098735951,1.0606205997\H,-3.8401615788,2.5728039071,0.7226674416\
H,-5.2349505613,3.51498823,3.9593576427\H,-5.8754875589,2.1290791028,3.0594489839\
H,-5.2875866579,1.9164169188,4.7175440301\H,-2.2203382366,3.6577926711,4.6302167466\
H,-2.1711492253,2.0172439912,5.2923858289\H,-1.075181278,2.4765138505,3.9766659879
\Version=ES64L-G16RevB.01\State=1-A\HF=-890.772072\RMSD=3.590e-09\RMSF=9.584e-
07\Dipole=0.4004485,1.2152371,0.2081827\Quadrupole=2.7699243,-2.2723725,-0.4975518,-
2.7239098,-0.8458587,0.8952872\PG=C01 [X(C12H23N1O1Si1)]\@
```

#### Methyl acrylate

HF=-306.4949522 a.u. (0)

```
1\1\GINC-R02N47\FOpt\RB3LYP\6-31G(d,p)\C4H6O2\WURTHWE\21-Jun-2023\0\#\ b3lyp/6-
31G(d,p) Opt emp=gd3bj Pop=NBO Freq scrfl=(solvent=dichloroethane)\methyl acrylate\0,1\
C,0.0196121855,0.,0.0136187591\O,0.0222798579,0.,1.2322464022\
C,1.219862861,0.,-0.8559471521\C,2.4452411674,0.,-0.3277052889\
O,-1.1075038187,0.,-0.7281250474\C,-2.3390321404,0.,0.0156991164\
H,1.050161181,0.,-1.9274724541\H,2.5798469904,0.,0.7494919818\
H,3.3333648508,0.,-0.9500935663\H,-3.1328885273,0.,-0.7293823096\
H,-2.4046346693,-0.8898233073,0.6456113863\H,-2.4046346693,0.8898233073,0.6456113863\
Version=ES64L-G16RevB.01\State=1-A\HF=-306.4949522\RMSD=4.427e-09\RMSF=6.082e-
05\Dipole=-0.1003371,0.,-0.7231601\Quadrupole=6.0688336,-2.0498695,-4.0189642,0.,-
1.5104814,0.\PG=CS [SG(C4H4O2),X(H2)]\@
```

#### Van der Waals Complex

HF=-1197.2793286 a.u. (0)

```
1\1\GINC-R02N31\FOpt\RB3LYP\6-31G(d,p)\C16H29N1O3Si1\WURTHWE\27-Apr-2023\0\#\
b3lyp/6-31G(d,p) opt=readfc geom=check guess=read Pop=NBO Freq emp=gd3bj
scrfl=(solvent=dichloroethane)\Van der Waals Complex\0,1\
```

C,-0.3598564188,0.1849346213,-0.185889427\C,-0.3481110073,0.2095948813,1.3471273238\  
C,1.0584727971,-0.0606317715,1.8937826395\C,2.0872218777,0.9217689217,1.3005406127\  
C,2.0344110334,0.9172368728,-0.2077607735\C,0.6629341713,1.1787102336,-0.7724189905\  
C,3.1539362657,0.679234036,-0.9164617191\C,3.3280732006,0.6569321392,-2.3784471112\  
N,2.3863660216,0.3996693806,-3.2028217057\C,2.7055588549,0.4591289302,-4.6223062951\  
O,4.5839433028,0.9492815648,-2.8325445396\Si,6.1199375461,1.0894739614,-2.1112500331\  
C,6.5329739463,-0.481402711,-1.1656913624\C,7.2583918845,1.2730555248,-3.5872759787\  
C,6.2078613651,2.6120545236,-1.0167901737\C,1.9014143672,3.9428830987,-2.8326414405\  
C,2.7916698502,3.9124290862,-1.838804331\C,2.4807712797,4.22689618,-0.4286665933\  
O,1.2062267482,4.6328921453,-0.2435992991\C,0.8401365368,4.9533717753,1.1095612132\  
O,3.2858309123,4.1308742014,0.4836604722\H,3.8194551984,3.6175955173,-2.0084237741\  
H,0.8671599645,4.2188965374,-2.6607422989\H,2.1880355648,3.6787186963,-3.8447898475\  
H,4.0674368874,0.5327271091,-0.3488912526\H,3.0963265402,0.68750781,1.6539123086\  
H,1.8538931313,1.935279581,1.6554743139\H,0.6827224406,1.12761465,-1.8592255417\  
H,0.3642918978,2.1946277441,-0.4785302478\H,-1.3595918364,0.4221062594,-0.5664548957\  
H,-0.1164651369,-0.8261686381,-0.5375420342\H,-1.0567052557,-0.5250475638,1.7464746318\  
H,-0.6861859585,1.1964901122,1.6933977013\H,1.3573395304,-1.0850231264,1.6357496948\  
H,1.0691375772,0.0092823953,2.9871603452\H,6.343874126,-1.3650937052,-1.7838158863\  
H,5.9660003176,-0.5903910456,-0.2370990497\H,7.5973401114,-0.4779832049,-0.9049839312\  
H,7.2233193422,0.3855564647,-4.2267896324\H,8.2937711834,1.4125155711,-3.2582313624\  
H,6.9783315799,2.1404463057,-4.1933496629\H,5.3807650091,2.6829496795,-0.3052723446\  
H,6.2004914926,3.5229022574,-1.6250449721\H,7.1463200619,2.6038667649,-0.4507294799\  
H,1.8159616588,0.1979790368,-5.2013155276\H,3.0342256599,1.4618463355,-4.9276281753\  
H,3.5135975547,-0.232146842,-4.8955711394\H,-0.1715192152,5.3517962019,1.0523067136\  
H,0.8574661624,4.0567756101,1.7335278108\H,1.5237429156,5.6950902109,1.5266617776  
\Version=ES64L-G16RevB.01\State=1-A\HF=-1197.2793286\RMSE=4.961e-09\RMSF=6.496e-  
06\Dipole=0.0889427,0.4396522,0.366197\Quadrupole=4.9938586,-3.849892,-1.1439666,-  
7.29847,-6.1634322,-2.5222166\PG=C01 [X(C16H29N1O3Si1)]\@

### TS-Diels-Alder

HF=-1197.250468 a.u. (1, -207.8175 cm<sup>-1</sup>)

1\1\GINC-R01N40\FTS\RB3LYP\6-31G(d,p)\C16H29N1O3Si1\WURTHWE\27-Apr-2023\0\#\br/>b3lyp/6-31G(d,p) Opt=(ts,noeigentest,readfc) geom=check guess=read Pop=NBO Freq emp=gd3bj  
scr=(solvent=dichloroethane)\TS-Diels-Alder\0,1\

C,0.1582692492,-0.2089956442,0.9860296644\C,0.6000170578,0.194332683,2.395978923\  
C,2.1329002585,0.3186360436,2.4884295488\C,2.8445294437,-0.8925297444,1.9522026271\  
C,2.3960187683,-1.3441323522,0.5855463556\C,0.8607405997,-1.497479169,0.5493932917\  
C,3.6887307828,-1.596709715,2.7490874934\C,4.5803272301,-2.6264225667,2.2915555672\  
O,4.852766217,-3.6709919738,3.0876483875\Si,3.7474257995,-4.4905705078,4.1360308813\  
C,4.6341214573,-6.1035045787,4.4620230088\N,5.2033689213,-2.5561145175,1.1381198588\  
C,5.995036647,-3.7068281305,0.7048436201\C,3.5135710228,-3.5096596383,5.7152014125\  
C,2.1430419653,-4.7272284587,3.1989658968\C,5.8382220003,-1.1355243026,0.4847184622\  
C,5.3814282919,0.1387397828,0.948307971\C,4.622502859,1.0508557332,0.1910898151\  
O,4.2057251352,2.1644857791,0.5565115672\O,4.3398058846,0.6112829569,-1.1074137024\  
C,3.5668279029,1.5140124984,-1.8930165412\H,5.6498919096,0.4764930735,1.9421286696\  
H,5.664266155,-1.3037101676,-0.5757289121\H,6.8754588894,-1.366560159,0.7439294204\  
H,3.7882028569,-1.3232706577,3.7958243104\H,2.4448640687,0.5187485909,3.5181671008\  
H,2.4692883294,1.1701541998,1.8784032752\H,2.8817625505,-2.2798680595,0.3061348392\  
H,2.6928123799,-0.6019846601,-0.1599085248\H,0.5572648638,-1.7815104693,-0.4640615084\  
H,0.5588189246,-2.3192984023,1.2125030032\H,-0.9295970979,-0.3360855582,0.9509415885\  
H,0.4083979473,0.5958724744,0.2812793094\H,0.258468295,-0.5647274455,3.1121790889\  
H,0.1391142331,1.1424405806,2.6927573181\H,2.3160771745,-5.2426506239,2.2488504738\  
H,1.6640208809,-3.7679024524,2.9862532524\H,1.4474119171,-5.3326659831,3.789643956\  
H,4.8045580681,-6.6542232374,3.5319107497\H,4.0399199648,-6.7377895241,5.1281120407\  
H,5.6038517448,-5.9298398583,4.9388913553\H,2.904205882,-2.6155468506,5.5585241954\



H,4.476935996,-3.2016369239,6.1337646058\H,3.008706448,-4.1329483526,6.4617297892\  
H,6.2598999507,-3.5626233684,-0.3443977681\H,6.9136614821,-3.8184344608,1.2903492807\  
H,5.4091903003,-4.6207967368,0.8077129593\H,3.45106296,1.0392100282,-2.8691331507\  
H,2.581390574,1.6909000721,-1.4499363953\H,4.0689155692,2.4793258991,-2.005933972\  
\Version=ES64L-G16RevB.01\State=1-A\HF=-1197.250468\RMSD=8.250e-09\RMSF=1.277e-  
06\Dipole=-0.7961059,-3.9251149,1.2950532\Quadrupole=3.7445513,-11.7937462,8.0491949,-  
8.2834092,0.8067622,0.7281352\PG=C01 [X(C16H29N1O3Si1)]\@

## Product H

HF=-1197.3118706 a.u. (0)

1\1\GINC-R02N13\FOpt\RB3LYP\6-31G(d,p)\C16H29N1O3Si1\WURTHWE\27-Apr-2023\0\#  
b3lyp/6-31G(d,p) Opt=readfc geom=check guess=read Pop=NBO Freq emp=gd3bj  
scrf=(solvent=dichloroethane)\Product H\0,1\  
C,1.7289118105,0.0757086183,-0.641946636\C,1.3338695846,-1.2637584069,0.0661858562\  
C,0.1103085728,-1.9057922998,-0.596899556\N,-1.0492975034,-1.0332445386,-0.4673483101\  
C,-0.7920383867,0.3041863678,-0.7721639526\C,0.441784042,0.8373355412,-0.8752267997\  
C,2.6559197176,0.8972658272,0.2922731778\C,2.4880640574,-0.1845165625,-1.9705635117\  
C,2.9561019672,1.1154172011,-2.6348897356\C,3.8628491524,1.9167936146,-1.6928435462\  
C,3.1675934782,2.1915481515,-0.3536905138\O,-1.919666645,1.0647964811,-0.9273478539\  
Si,-2.4566119985,2.1045355778,0.3110226361\C,-1.3686334703,3.632566443,0.3883774909\  
C,-4.2048003874,2.5423518306,-0.1992859737\C,-2.401391427,1.1672627409,1.9357945863\  
C,-2.2887850313,-1.6315649793,-0.9489202984\C,2.5032592241,-2.2187739707,0.1737984848\  
O,3.3760628169,-2.1518947996,1.019344886\O,2.4952771973,-3.1572585744,-0.7940746546\  
C,3.6015923926,-4.078767678,-0.7812138757\H,1.0641569574,-1.0085724631,1.0965429499\  
H,0.3230625722,-2.126522981,-1.6536363596\H,-0.1238584284,-2.857442364,-0.1114177432\  
H,0.496999552,1.8988654214,-1.0739442792\H,2.1148365892,1.1238830565,1.2187434502\  
H,3.5138184885,0.2747179558,0.5696206679\H,1.8519416185,-0.754246551,-2.6551588375\  
H,3.3733247936,-0.8019648173,-1.7660232875\H,3.4858886684,0.8831533426,-3.5658043912\  
H,2.0841196943,1.7205267025,-2.9127585574\H,4.1696510794,2.858042613,-2.1634193014\  
H,4.7810899771,1.3414591757,-1.5085431754\H,2.3343995887,2.8876976773,-0.5127764063\  
H,3.8565163089,2.6932658988,0.3356369324\H,-1.3247856587,4.1359759041,-0.5828606956\  
H,-0.3474336407,3.3756164213,0.6848516787\H,-1.764538716,4.3449426104,1.1207502316\  
H,-4.2182349902,3.0264082578,-1.1811077776\H,-4.6565330091,3.232168424,0.5214490637\  
H,-4.8345137678,1.6485763767,-0.2521745566\H,-1.3872242744,0.8113168458,2.1421171638\  
H,-3.0659090653,0.2980966301,1.9156200158\H,-2.7084369441,1.8134906496,2.7649976476\  
H,-2.4451455643,-2.5779961504,-0.4245688538\H,-3.128653673,-0.9719545626,-0.7407397594\  
H,-2.2652044251,-1.8368752302,-2.0314258582\H,3.4272936674,-4.7576051592,-1.6143021343\  
H,4.5435211754,-3.5425387362,-0.9139350016\H,3.6303572625,-4.6274645335,0.1622132739\  
\Version=ES64L-G16RevB.01\State=1-A\HF=-1197.3118706\RMSD=3.929e-09\RMSF=1.314e-  
06\Dipole=-0.7070982,-0.3899719,-0.2618372\Quadrupole=-0.9209574,7.6502282,-6.7292708,-  
2.9390958,-7.8907882,5.3182845\PG=C01[X(C16H29N1O3Si1)]\@

## TPSS

### 2-Silyloxy-1-azabutadiene G

HF=-891.0724298 a.u. (0)

1\1\GINC-R01N44\FOpt\RTPSS\TPSS\def2TZVP\C12H23N1O1Si1\WURTHWE\26-May-  
2023\0\# tpsstps/def2tzvp opt=readfc geom=check guess=read freq pop=nbo emp=gd3bj  
scrf=(solvent=dichloroethane)\2-Silyloxy-1-azabutadiene G\0,1\  
C,-0.0400442138,-0.0923519179,0.0833688586\C,-0.059308501,-0.3001907394,1.6021906717\  
C,1.3554342319,-0.1397373426,2.1958082167\C,2.3374046868,-1.0513317782,1.5043543019\  
C,2.3720282179,-0.9093199183,0.0070710394\C,0.9534706999,-1.0469719777,-0.5880380858\  
C,3.0411331748,-1.9539418554,2.2147154471\C,3.9887095172,-2.9548122329,1.7017963912\  
O,3.9398383287,-4.1735749408,2.3437404205\Si,2.5733447288,-5.068872283,2.798537704

C,3.2667166283,-6.7831019384,3.0799519039\N,4.8387919082,-2.726453695,0.7751966819\  
C,5.6945720686,-3.8388200403,0.3597416412\C,1.8072800754,-4.4080111259,4.3785169539\  
C,1.3378780688,-5.0320379547,1.3907057777\H,2.8703543096,-2.0086662601,3.2889402694\  
H,1.3498048028,-0.3304487574,3.274265658\H,1.6752147581,0.9026753557,2.0450826556\  
H,3.0597165753,-1.6344435853,-0.4311122143\H,2.7564365144,0.0928010769,-0.2367084388\  
H,0.9950892517,-0.8623922125,-1.667773609\H,0.610855331,-2.0816201684,-0.4524143254\  
H,-1.0446273772,-0.2388260153,-0.3313337152\H,0.2490712494,0.9455103001,-0.1353900351\  
H,-0.4287036646,-1.3095883631,1.8288805439\H,-0.7423092447,0.4105651641,2.0816707499\  
H,1.790433465,-5.3871745524,0.4576294866\H,0.9630099149,-4.0163589982,1.2235070224\  
H,0.4786838785,-5.6753171515,1.6168546607\H,3.7307252771,-7.175776649,2.1681070682\  
H,2.4726936943,-7.4763249998,3.3826377274\H,4.0252468353,-6.7751215927,3.8714261228\  
H,1.2773397021,-3.4631949617,4.2186672055\H,2.5670218007,-4.2499859556,5.1529192859\  
H,1.0822649765,-5.1354291524,4.765618534\H,6.2591297865,-3.5347155289,-0.5252781238\  
H,6.4070203599,-4.1066349056,1.1513906237\H,5.1148890348,-4.7409235848,0.1240990138\  
Version=ES64L-G16RevB.01\State=1-A\HF=-891.0724298\RMSD=3.520e-09\RMSF=6.060e-07\  
Dipole=-1.3163522,-0.3381819,0.358951\Quadrupole=-4.0099491,3.5521958,0.4577532,-2.8569322,0.4455642,-0.5801726\PG=C01 [X(C12H23N1O1Si1)]\@

### Methyl acrylate

HF=-306.6537768 a.u. (0)

1\1\GINC-R03N46\FOpt\RTPSSTPSS\def2TZVP\C4H6O2\WURTHWE\21-Jun-2023\0\#  
tpsstps/def2tzvp Opt=readfc geom=check guess=read emp=gd3bj Pop=NBO Freq  
scr=(solvent=dichloroethane)\Methylacrylate)\0,1\  
C,0.0208563135,0.,0.0176628318\O,0.0131585819,0.,1.2387732425\  
C,1.2209913413,0.,-0.8494799771\C,2.4504036988,0.,-0.3282068993\  
O,-1.1079864272,0.,-0.7347898307\C,-2.3487737881,0.,0.0178984275\  
H,1.0491093637,0.,-1.9216893553\H,2.595695706,0.,0.7485236555\  
H,3.3332765139,0.,-0.95920783\H,-3.1368933765,0.,-0.7334150994\  
H,-2.4040813296,-0.8933737659,0.6437420224\H,-2.4040813296,0.8933737659,0.6437420224\  
\Version=ES64L-G16RevB.01\State=1-A\HF=-306.6537768\RMSD=8.896e-09\RMSF=4.510e-06\  
Dipole=-0.116835,0.,-0.782647\Quadrupole=6.3118942,-2.1864667,-4.1254274,0.,-1.4847024,0.\PG=CS [SG(C4H4O2),X(H2)]\@

### Van der Waals Complex

HF=-1197.7328322 a.u. (0)

1\1\GINC-R03N34\FOpt\RTPSSTPSS\def2TZVP\C16H29N1O3Si1\WURTHWE\27-Apr-2023\0\#  
tpsstps/def2tzvp opt=readfc geom=check guess=read Pop=NBO Freq emp=gd3bj  
scr=(solvent=dichloroethane)\Van der Waals Complex)\0,1\  
C,-0.301440291,0.0202061935,-0.2299023724\C,-0.2961554507,0.0137499089,1.3038419691\  
C,1.1290892971,-0.1167421957,1.8544049348\C,2.0468644562,0.9874712762,1.2843056775\  
C,2.0021543001,0.9761251834,-0.2213359877\C,0.6193313631,1.1295096233,-0.7867017942\  
C,3.1362127287,0.7882299794,-0.9272317617\C,3.3180105899,0.7248626384,-2.3821050848\  
N,2.3801327225,0.4791345754,-3.219367055\C,2.7339052494,0.4775354891,-4.6367811614\  
O,4.595167842,0.9610442559,-2.82983105\Si,6.1214507996,1.0127042041,-2.1043473315\  
C,6.4391744865,-0.5758527328,-1.1574367927\C,7.2728924336,1.140283359,-3.5731834474\  
C,6.2924282379,2.5216418729,-1.0056335548\C,1.8292442914,3.994889758,-2.7802964816\  
C,2.7530185263,4.1293450628,-1.8248171432\C,2.4686969451,4.5146290024,-0.428636419\  
O,1.151506713,4.7278394154,-0.1897662257\C,0.8268280089,5.1268574251,1.1650670273\  
O,3.3291401579,4.634994872,0.433018045\H,3.8034452402,3.9457188667,-2.0233740463\  
H,0.7764919997,4.1659874409,-2.5813085773\H,2.1067283463,3.6979923956,-3.7864831428\  
H,4.058712465,0.7106666748,-0.3555218416\H,3.0737065172,0.8653491621,1.6445787171\  
H,1.681063726,1.9592146047,1.646778079\H,0.6444451361,1.1091526493,-1.8758831739\  
H,0.2231066933,2.1011928137,-0.4564551407\H,-1.3190763634,0.1684782005,-0.6096716605\  
H,0.0459072777,-0.9520693047,-0.6037843531\H,-0.9216308386,-0.8039746485,1.6819639412

H,-0.7390236411,0.9515360775,1.6689860594\H,1.5403855263,-1.0967337129,1.5779080205\  
H,1.1268433354,-0.0624510674,2.9493289945\H,6.2387382647,-1.448975135,-1.7894227566\  
H,5.8290635506,-0.6654958749,-0.2525191647\H,7.4924937981,-0.6169652665,-0.8527440599\  
H,7.1802574172,0.2644069386,-4.2254310451\H,8.3160810519,1.206347849,-3.2412353194\  
H,7.0518932204,2.0335704467,-4.1687732766\H,5.5342303905,2.562759132,-0.2171654226\  
H,6.2158348905,3.4435196996,-1.5938432993\H,7.279089605,2.5171972081,-0.5251659936\  
H,1.8365025447,0.2635271442,-5.2229014444\H,3.1428645231,1.4458156156,-4.9566372325\  
H,3.4937601467,-0.282787029,-4.8637513331\H,-0.2577557117,5.2237928099,1.1794530383\  
H,1.1596983048,4.3642450545,1.8723869956\H,1.3071922165,6.0796264084,1.3989614476\  
Version=ES64L-G16RevB.01\State=1-A\HF=-1197.7328322\RMSD=2.156e-09\RMSF=8.828e-  
07\Dipole=-0.1592426,0.0597492,0.3755752\Quadrupole=5.6615299,-5.5478713,-0.1136586,-  
7.8416301,-6.5295771,-3.0869642\PG=C01 [X(C16H29N1O3Si1)]\@

### TS-Diels-Alder

HF=-1197.7097369 a.u. (1, -239.6004 cm<sup>-1</sup>)

1\1\GINC-R03N14\FTS\RTPSSTPSS\def2TZVP\C16H29N1O3Si1\WURTHWE\28-Apr-  
2023\0\# tpsstps\def2tzvp Opt=(ts,noeigentest,readfc) geom=check guess=read Pop=NBO Freq  
emp=gd3bj scrf=(solvent=dichloroethane)\ TS-Diels-Alder\0,1\  
C,0.0785990887,-0.3095893806,0.971145048\C,0.512161076,0.056672224,2.3941962532\  
C,2.0385986386,0.2803145212,2.4717540638\C,2.7969011081,-0.8787109475,1.8907664289\  
C,2.3895085473,-1.2492934314,0.490849425\C,0.8661884634,-1.5194379234,0.4597680494\  
C,3.5707399016,-1.6572251669,2.6991838626\C,4.4804928261,-2.66088481,2.2454333208\  
O,4.7685847817,-3.7209524315,3.0291870721\Si,3.7630607003,-4.4918713343,4.1824631658\  
C,4.5670216345,-6.1690898297,4.349489581\N,5.1249500764,-2.5503010621,1.1028458848\  
C,5.9723633882,-3.663590348,0.6694659172\C,3.823502804,-3.5543964157,5.8015518822\  
C,2.0262971133,-4.6068484149,3.4967121658\C,5.832962903,-1.0649910699,0.5919687231\  
C,5.2720756369,0.1777861738,1.0159437635\C,4.6086961634,1.0904074348,0.1646247464\  
O,4.1503297448,2.2051607151,0.4767657722\O,4.4899523257,0.6453070824,-1.158207909\  
C,3.8216878534,1.5609426758,-2.0413686266\H,5.4204756376,0.5203570029,2.0336384503\  
H,5.8188677056,-1.219259813,-0.4840614353\H,6.8151307694,-1.2914931446,1.0142356194\  
H,3.5852947129,-1.4527666984,3.7680377869\H,2.3503919708,0.4621966473,3.5054259255\  
H,2.3021370255,1.1710688328,1.8824569927\H,2.9443876544,-2.1183406071,0.1348435488\  
H,2.6048086428,-0.4217765141,-0.1916333793\H,0.5741222759,-1.7661185368,-0.5675844044\  
H,0.639147362,-2.3963144706,1.0807575953\H,-0.9978407089,-0.5177707575,0.9468727986\  
H,0.2570264068,0.5455900478,0.3043574596\H,0.2367935685,-0.7567276103,3.0791489098\  
H,-0.0044556848,0.9596389342,2.7387667008\H,2.0268570301,-5.0619348803,2.4995265747\  
H,1.5521187795,-3.6232374799,3.4235399897\H,1.4103604227,-5.2338860642,4.1531573582\  
H,4.559450702,-6.7071244921,3.3948919177\H,4.0319814842,-6.7790025209,5.0870515079\  
H,5.6075118813,-6.0754751137,4.6809765514\H,3.2951678438,-2.5966714238,5.7507489306\  
H,4.8587632845,-3.360590737,6.1047915246\H,3.3502356521,-4.1531246696,6.5900075293\  
H,6.284435135,-3.4684237937,-0.3592536701\H,6.8625767979,-3.7741046393,1.2993344174\  
H,5.4021384504,-4.5936971547,0.7092497661\H,3.8083269665,1.0661875796,-3.0141803259\  
H,2.7998004706,1.7587123573,-1.7026993005\H,4.3635136979,2.5094066029,-2.1047994708\  
Version=ES64L-G16RevB.01\State=1-A\HF=-1197.7097369\RMSD=3.469e-09\RMSF=1.313e-  
06\Dipole=-0.725525,-3.7050695,1.2057848\Quadrupole=4.3810385,-13.2950406,8.9140021,-  
7.6742818,0.7097126,0.8384025\PG=C01 [X(C16H29N1O3Si1)]\@

### Product H

HF=-1197.7600269 a.u. (0)

1\1\GINC-R03N44\FOpt\RTPSSTPSS\def2TZVP\C16H29N1O3Si1\WURTHWE\27-Apr-  
2023\0\# tpsstps\def2tzvp opt=readfc geom=check guess=read Pop=NBO Freq emp=gd3bj  
scrf=(solvent=dichloroethane)\ Product H\0,1\  
C,0.404027183,-0.1939585215,0.2621011915\C,0.9111253219,-0.3133294472,1.7049364655\  
C,2.372122717,0.1419505691,1.8134724276\C,2.5619852408,1.5562048709,1.2483784629\  
C,2.0622154374,1.6903620703,-0.2134572017\C,0.5799890033,1.2379108676,-0.2568694735\  
Version=ES64L-G16RevB.01\State=1-A\HF=-1197.7600269\RMSD=3.469e-09\RMSF=1.313e-  
06\Dipole=-0.725525,-3.7050695,1.2057848\Quadrupole=4.3810385,-13.2950406,8.9140021,-  
7.6742818,0.7097126,0.8384025\PG=C01 [X(C16H29N1O3Si1)]\@

C,2.9366472421,0.8562327342,-1.1224541559\C,3.4775960538,1.2978059567,-2.2790636198\  
N,3.2632994368,2.5643341487,-2.8128323318\C,2.1434963384,3.282509489,-2.2093304134\  
C,2.2232481277,3.1768643682,-0.6818883554\C,1.2511487223,4.1058673244,0.0118602462\  
O,0.1519644033,4.3578034078,-0.738402368\C,-0.839416942,5.2173616437,-0.1172950549\  
O,4.3332537814,0.525698252,-3.0259277162\Si,5.8948971295,0.1434043187,-2.4946507188\  
C,5.8517711626,-1.2380319398,-1.2266274525\C,6.760940948,-0.4201695601,-4.0541874641\  
C,6.666572992,1.6859741835,-1.7631444834\C,3.3876468708,2.7562193774,-4.257511738\  
O,1.4124427233,4.5803951229,1.1240993997\H,3.2229048222,3.4978746943,-0.3671955426\  
H,1.1819166792,2.886311231,-2.5701372916\H,2.2095325129,4.3288131583,-2.5218212128\  
H,3.226650168,-0.1337149099,-0.7927107826\H,3.6197735199,1.8451276823,1.2899339074\  
H,2.0069602158,2.2665481173,1.8738085206\H,0.1960761041,1.325767917,-1.2791984397\  
H,-0.0171799375,1.9106872388,0.3761976801\H,-0.653401839,-0.478830708,0.2055693854\  
H,0.9570870153,-0.8889005679,-0.3837459562\H,0.8063263491,-1.3441049263,2.0646317936\  
H,0.288355558,0.3185880289,2.3547740999\H,3.0148634059,-0.5677218097,1.2759099873\  
H,2.6986509957,0.1239215226,2.8603435115\H,5.2733825508,-2.0945294842,-1.5922804587\  
H,5.4119885652,-0.9063299498,-0.2798229672\H,6.8715535703,-1.5857625688,-1.0176165816\  
H,6.2506067953,-1.2837626184,-4.4966250853\H,7.7943792711,-0.7163184253,-3.8376932466\  
H,6.7877846683,0.379714257,-4.8029731198\H,6.0686510121,2.0566400946,-0.9223717817\  
H,6.7397441152,2.4866354726,-2.507702806\H,7.6760906009,1.473960033,-1.390354452\  
H,2.5366460876,2.3245254218,-4.8094276465\H,3.422938695,3.8309770378,-4.4555673312\  
H,4.3079882413,2.2957620651,-4.6135109155\H,-1.639675621,5.3022072843,-0.8508517801\  
H,-1.2010472536,4.7601297337,0.806206399\H,-0.4018467645,6.1938991545,0.100191663  
\Version=ES64L-G16RevB.01\State=1-A\HF=-1197.7600269\RMSD=4.695e-09\RMSF=1.289e-  
06\Dipole=-0.0549439,0.0874132,-0.8802475\Quadrupole=8.1848902,-1.5235736,-6.6613166,-  
6.5980134,-1.121396,-7.2677308\PG=C01 [X(C16H29N1O3Si1)]\@

## PBE1PBE

### 2-Silyloxy-1-azabutadiene G

HF=-890.094248 a.u. (0)

1\1\GINC-R04N05\FOpt\RPBE1PBE\def2TZVP\C12H23N1O1Si1\WURTHWE\27-Apr-  
2023\0\# pbe1pbe/def2tzvp opt=readfc geom=check guess=read freq pop=nbo emp=gd3bj  
scrf=(solvent=dichloroethane)\ 2-Silyloxy-1-azabutadiene G \0,1\  
C,-0.3693523978,-0.0595752295,-0.0482294658\C,-0.1627198288,0.0379093113,1.4295190715\  
C,1.2608420904,0.2817191654,1.8248303705\C,2.171407603,-0.7981065558,1.2357987981\  
C,1.9917779935,-0.9106008161,-0.2709923198\C,0.5339499403,-1.1434108842,-0.6401365283\  
C,-1.1186333295,-0.1005270309,2.3532085429\C,-2.5478025119,-0.3456049572,2.1163228778\  
O,-3.3852947188,0.400722865,2.8769886388\N,-2.9793741244,-1.2224385471,1.3102514665\  
C,-4.4131893789,-1.3445867244,1.1618269405\H,1.3582263186,0.323087836,2.9122188829\  
H,1.5758869091,1.2563078301,1.4286951242\H, 1.9295557783,-1.7591291534,1.7039922067\  
H,3.2132790316,-0.5768576367,1.4836805567\H,2.6157739829,-1.717922928,-0.6652166184\  
H,2.3391275239,0.0158277723,-0.7451009101\H,0.2099529723,-2.1189089612,-0.2603456156\  
H,0.4130760591,-1.168913086,-1.7266603849\H,-1.4138783353,-0.2542977525,-0.2836748598\  
H,-0.0879317982,0.9045905448,-0.4937335067\H,-0.8533530029,0.035727193,3.3987090077\  
Si,-3.3639472028,2.0731178091,3.0840546581\H,-4.632578613,-2.0723276661,0.3798305312\  
H,-4.8856403641,-0.3926592606,0.8944182543\H,-4.8873122858,-1.6852259666,2.0890236031\  
C,-5.0582323783,2.4489212398,3.750207287\C,-2.0509284331,2.5848616802,4.3037882723\  
C,-3.0727406667,2.854897221,1.4186332501\H,-3.0993499266,3.9450495834,1.4981016556\  
H,-2.096468951,2.5692999496,1.0186711897\H,-3.8396977496,2.5474334233,0.7032259558\  
H,-5.171594068,3.5222778609,3.9239662096\H,-5.8332724167,2.1329488675,3.047901592\  
H,-5.2254975945,1.9336653274,4.699456631\H,-2.181435589,3.6408078665,4.5585708745\  
H,-2.1256975612,2.0048958089,5.2272706203\H,-1.046103815,2.4579059802,3.8961948526  
\Version=ES64L-G16RevB.01\State=1-A\HF=-890.094248\RMSD=3.376e-09\RMSF=3.229e-  
06\Dipole=0.4331303,1.261236,0.1991315\Quadrupole=2.9213238,-2.7432324,-0.1780914,-  
2.6257249,-0.9950367,0.6755765\PG=C01 [X(C12H23N1O1Si1)]\@

### Methyl acrylate

HF=-306.2510928 a.u. (0)

1\1\GINC-R02N20\FOpt\RPBE1PBE\def2TZVP\C4H6O2\WURTHWE\21-Jun-2023\0\#\#  
pbe1pbe/def2tzvp Opt=readfc geom=check guess=read emp=gd3bj Pop=NBO Freq  
scrf=(solvent=dichloroethane)\methyl acrylate)\0,1\  
C,0.0158423186,0.,0.0153163324\O,0.0189374757,0.,1.2232311363\  
C,1.2129643671,0.,-0.8497799473\C,2.4318531345,0.,-0.3269507625\  
O,-1.1001135621,0.,-0.7184585218\C,-2.3241536347,0.,0.0134733878\  
H,1.0437861289,0.,-1.9200766967\H,2.5694356872,0.,0.7486770503\  
H,3.3152599836,0.,-0.9533532746\H,-3.1158090914,0.,-0.7313353605\  
H,-2.3931637696,-0.8887982566,0.6414049335\H,-2.3931637696,0.8887982566,0.6414049335  
\Version=ES64L-G16 RevB.01\State=1-A\HF=-306.2510928\RMSD=3.501e-09\RMSF=1.750e-  
05\Dipole=-0.106331,0., -0.802583\ Quadrupole= 6.2924609,-2.2405274,-4.0519335,0.,-  
1.4425267,0.\PG=CS [SG(C4H4O2),X(H2)]\@

### Van der Waals Complex

HF=-1196.3528604 a.u. (0)

1\1\GINC-R03N34\FOpt\RPBE1PBE\def2TZVP\C16H29N1O3Si1\WURTHWE\28-May-  
2023\0\#\# pbe1pbe/def2tzvp opt=readfc geom=check guess=read freq pop=nbo emp=gd3bj  
scrf=(solvent=dichloroethane)\Van der Waals Complex\0,1\  
H,-3.9266130606,0.9497163069,-2.5277426913\C,-3.2555702465,1.3168984631,-1.7462729858\  
C,-4.0350382079,2.0573448854,-0.6708505504\C,-3.1135255654,2.5207209374,0.4459561484\  
C,-2.3160983346,1.3623276825,1.0486686505\C,-1.6006243743,0.593147207,-0.0139609584\  
C,-2.4727285978,0.1486631751,-1.1491180755\C,-0.2902177974,0.3189694511,-0.0351536886\  
C,0.7434355656,0.6438299451,0.9515851094\O,2.0117373153,0.6086084328,0.4858070036\  
Si,2.6776217664,0.8855594297,-1.0317276357\C,1.9290618027,2.4329042096,-1.7495291145\  
N,0.5072969366,0.892046,2.1742041451\C,1.637513833,1.1815704992,3.0245516637\  
H,1.2814499686,1.4271528096,4.025974113\C,4.4874399534,1.0989141537,-0.6632442591\  
C,2.4178218738,-0.5808676494,-2.1583064184\C,-0.468287104,-2.2032086155,2.890469594\  
C,-1.1244935172,-2.5497632318,1.7916320671\C,-0.3991064847,-2.8953255548,0.5565047343\  
O,0.8015880369,-2.957993068,0.4337033025\O,-1.2518328997,-3.1403123682,-0.4446460912\  
C,-0.6587118206,-3.4619953935,-1.6985854083\H,0.0852204013,-0.2200233856,-0.8992613062\  
H,-2.2068152465,-2.5680677642,1.7455729532\H,-0.9903081386,-1.9274871948,3.7980542913\  
H,0.6150266135,-2.176728077,2.899297266\H,-3.1889736383,-0.5888578136,-0.762476009\  
H,-1.8772531804,-0.3546260296,-1.9143023978\H,-2.5539428284,2.0082052172,-2.2278272143\  
H,-4.8003595554,1.3896565723,-0.2558532555\H,-4.5638479163,2.9105820009,-1.1055406699\  
H,-3.6848063508,3.0164711586,1.2356686909\H,-2.4120162352,3.2646464649,0.0501777505\  
H,-3.0152050591,0.6755616725,1.5461708454\H,-1.6145039935,1.7052457394,1.805825284 9\  
H,-0.010051298,-2.6522594391,-2.034765151\H,-1.4839372553,-3.5986942263,-2.3929821052\  
H,-0.0716162744,-4.3778702452,-1.6217363786\H,2.2346144029,2.0222084851,2.6522333817\  
H,2.3161275897,0.3240245026,3.1029172423\H,3.1720454726,-0.5679586653,-2.9504159583\  
H,2.5216878093,-1.5180332186,-1.6057550727\H,1.4368246908,-0.5710368306,-2.6385502229\  
H,5.0443015813,1.3032522525,-1.58153777\H,4.649845369,1.9300755293,0.0271144983\  
H,4.8999486029,0.193186647,-0.2115442302\H,2.3936803632,2.665331301,-2.7118726349\  
H,0.854985993,2.3145512493,-1.911379649\H,2.0832403934,3.2854804542,-1.0832681354  
\Version=ES64L-G16RevB.01\State=1-A\HF=-1196.3528604\RMSD=5.511e-09\RMSF=2.785e-  
06\Dipole=-0.6788242,0.2941757,-1.2858491\Quadrupole=1.9891441,-  
4.5526107,2.5634667,4.6643817,-2.2136789,1.4766129\PG=C01 [X(C16H29N1O3Si1)]\@

### TS-C..N

HF=-1196.3288379 a.u. (1, -292.4280cm<sup>-1</sup>)

1\1\GINC-R03N04\FTS\RPBE1PBE\def2TZVP\C16H29N1O3Si1\WURTHWE\29-Apr-202  
3\0\#\# pbe1pbe/def2tzvp Opt=(ts,noeigentest,readfc,maxstep=2) geom=check guess=read  
Pop=NBO Freq emp=gd3bj scrf=(solvent=dichloroethane)\TS-C..N \0,1\  
@

C,0.0794176924,-0.3894365128,1.0377786857\C,0.5052006452,-0.0407955543,2.4546556041\  
 C,2.0123200793,0.1923051238,2.5344503536\C,2.7945894242,-0.9393338848,1.9487643609\  
 C,2.3615336128,-1.3655819256,0.5833328848\C,0.8500456898,-1.5948127977,0.5254311443\  
 C,3.7654167528,-1.5271712542,2.6589934054\C,4.6172005082,-2.6045253643,2.1901978324\  
 O,4.7463406327,-3.68194277,2.9501654343\Si,3.6713844567,-4.3850769102,4.072749997\  
 C,4.5002516645,-6.0061384989,4.4307352823\N,5.284534419,-2.545295094,1.0888235867\  
 C,6.0274087689,-3.709993214,0.6589841606\C,3.5513463857,-3.3358753529,5.6037528112\  
 C,2.0234583548,-4.6044661728,3.2427365172\C,6.0355448826,-1.0926470742,0.4319392574\  
 C,5.6600994459,0.1734893492,0.9125198283\C,4.8120996553,1.0693462033,0.2327431302\  
 O,4.4238288324,2.166968225,0.6369722306\O,4.4317331264,0.6422161103,-1.020483671\  
 C,3.5967187993,1.5263682461,-1.739113624\H,5.9896135984,0.5015048981,1.8905062064\  
 H,5.8312910944,-1.2768656117,-0.6182334721\H,7.0309953425,-1.4331703609,0.7167178365\  
 H,3.9363953981,-1.218742069,3.6858507453\H,2.3283064296,0.380798424,3.5627834481\  
 H,2.2676243208,1.0870746948,1.950665256\H,2.9019029422,-2.2550025658,0.2599486491\  
 H,2.6260142292,-0.5696735875,-0.1193058133\H,0.5647939222,-1.8268778821,-0.5040972663\  
 H,0.5910827777,-2.4727820281,1.1282338554\H,-0.9961501398,-0.5841384004,1.0019843604\  
 H,0.2684796083,0.4684430737,0.3807919611\H,0.2310936309,-0.8611855101,3.1283681401\  
 H,-0.0203578842,0.8493874655,2.809904934\H,2.129530273,-5.1334045584,2.2924714479\  
 H,1.5429172098,-3.6430626393,3.0535755358\H,1.3633275374,-5.1927913795,3.8861622912\  
 H,4.6093542428,-6.5991737849,3.5196919624\H,3.9076852104,-6.5840333598,5.1447322604\  
 H,5.4925088377,-5.8508053968,4.8611895548\H,2.9480019873,-2.4404119426,5.4448575046\  
 H,4.5418591825,-3.0323436655,5.9516461362\H,3.0812674692,-3.92016819,6.4003447729\  
 H,6.3766570749,-3.5374135443,-0.3594127984\H,6.8935001369,-3.9000046722,1.2989226095\  
 H,5.3922107489,-4.5954373259,0.6753076446\H,3.4037542438,1.0466951903,-2.6983305637\  
 H,2.6505992604,1.6982333497,-1.2188491123\H,4.079468198,2.4924756458,-1.9004128392  
 \Version=ES64L-G16RevB.01\State=1-A\HF=-1196.3288379\RMSD=4.245e-09\RMSF=9.297e-  
 07\Dipole=-1.1968298,-4.1934475,1.321979\Quadrupole=4.0371358,-13.5396897,9.5025539,-  
 11.1288994,1.9173503,1.2126521\PG=C01[X(C16H29N1O3Si1)]\@

### Dipolar Intermediate

HF=-1196.3415293 a.u. (0)

1\1\GINC-R10N27\FOpt\RPBE1PBE\def2TZVP\C16H29N1O3Si1\WURTHWE\31-May-  
 2023\0\# pbe1pbe/def2tzvp opt=(maxstep=3) geom=check guess=read Pop=NBO Freq emp=gd3bj  
 scrf=(solvent=dichloroethane)\ Dipolar Intermediate \0,1\  
 H,-1.932864647,3.1729792616,2.3981674418\C,-2.2419698457,2.6521109779,1.4887457553\  
 C,-0.9940134728,2.1873784542,0.7334214631\C,-1.3582054757,1.5677385399,-0.5773222953\  
 C,-2.2593621305,2.3984485805,-1.4347409047\C,-3.5023847918,2.8490206707,-0.6675937875\  
 C,-3.1224111542,3.5444162508,0.6296386101\C,-0.9823250781,0.3464236242,-0.975751617\  
 C,-0.1687018595,-0.5954191214,-0.214758135\O,-0.6387757481,-1.7982623947,0.0018852521\  
 Si,-2.2320919338,-2.4323055464,0.0172224678\C,-1.9397445421,-4.1397650848,0.6743105869\  
 N,1.0236963422,-0.3451647453,0.2283217817\C,1.8549805347,0.850165746,-0.1838735221\  
 C,3.1156968763,0.4669961464,-0.8233247839\C,4.2845645393,0.3963087894,-0.0803701701\  
 O,4.4361752108,0.5938481859,1.1405100374\C,1.7073770477,-1.335368141,1.048950368\  
 H,1.911272133,-2.2409677432,0.4776757725\O,5.3947782803,0.0619314405,-0.8438689248\  
 C,6.6079331122,-0.0537611213,-0.1358316029\C,-3.2573042445,-1.3909816741,1.1620346858\  
 C,-2.9105259918,-2.4686339152,-1.7120627155\H,-1.3689757905,-0.0540050291,-1.9078992735\  
 H,3.1298991778,0.2183394779,-1.8766855417\H,2.038844067,1.4006242998,0.7417479361\  
 H,1.2051149641,1.4430266885,-0.8245450649\H,-0.4092229341,1.5052914599,1.3505517575\  
 H,-0.3605960781,3.0603813485,0.5302677628\H,-2.8134136034,1.7736429311,1.807943583\  
 H,-4.0213190912,3.8291728765,1.1829539332\H,-2.5853954584,4.4724218037,0.3996114653\  
 H,-4.099871734,3.5090910331,-1.3011613286\H,-4.1245864413,1.9741938722,-0.4463126609\  
 H,-1.6987879476,3.2905983729,-1.743257944\H,-2.5309415247,1.8558035083,-2.3422976227\  
 H,7.3697501015,-0.2990242232,-0.8767030063\H,6.5662771579,-0.8468719834,0.6163160752

H,6.8773768772,0.8782294788,0.3676480415\H,1.0783655623,-1.5946225169,1.9007416681\  
H,2.6445813456,-0.8943591173,1.3806184379\H,-2.177591222,-2.8719718361,-2.414895789\  
H,-3.224005132,-1.4824656847,-2.0587362577\H,-3.7873863212,-3.1225471144,-1.731544772\  
H,-3.4447553639,-0.4005750706,0.7443115912\H,-2.7694603044,-1.2744197076,2.1326755862\  
H,-4.2233480192,-1.8769320957,1.3251794214\H,-1.2768667063,-4.7029162793,0.0131242767\  
H,-2.8859757211,-4.681759037,0.7487040795\H,-1.4873450997,-4.1046014273,1.6679631783\  
\Version=ES64L-G16RevB.01\State=1-A\HF=-1196.3415293\RMSD=6.290e-09\RMSF=5.435e-06\  
Dipole=-6.5771337,-0.9840076,-0.2129633\Quadrupole=-20.9822936,16.8283089,4.1539847,-5.4349228,-0.5192771,-1.5951829\PG=C01 [X(C16H29N1O3Si1)]\@

### TS-C..C

HF=-1196.3348037 a.u (1, -52.2241cm<sup>-1</sup>)  
1\1\GINC-R03N28\FTS\RPBE1PBE\def2TZVP\C16H29N1O3Si1\WURTHWE\08-Jun-2023\0\#  
pbe1pbe/def2tzvp Opt=(ts,noeigentest,readfc,maxstep=4) geom=check guess=read nosym  
emp=gd3bj freq pop=nbo scrf=(solvent=dichloroethane)\TS-C..C\0,1\  
H,0.002167473,-0.0026576373,-0.0065547751\C,0.0001232439,-0.0005849808,1.0867427682\  
C,1.4500023842,0.0019013524,1.5866150407\C,1.4584114892,-0.0357302402,3.0825700708\  
C,0.6981208614,-1.1830443855,3.6666454856\C,-0.7396768335,-1.2220092288,3.1444552388\  
C,-0.7740065316,-1.1924770206,1.6250393202\C,1.8668062504,0.9677818454,3.8844969437\  
C,2.7047445185,2.0587062037,3.5019438102\O,2.5537218257,3.2305349751,4.0881778755\  
Si,1.2006928985,3.9097480708,4.8736387214\C,1.6765306576,5.7001488087,4.9746818826\  
N,3.649025723,1.9798292642,2.5967740547\C,4.4887177769,0.7384096282,2.2592149574\  
C,4.2372167234,-0.5354673777,2.9204877689\C,4.3720152199,-0.6205902625,4.2972440979\  
O,4.6360580436,0.3156968248,5.0699346763\C,4.3114997394,3.202566194,2.1818554309\  
H,3.5818418107,3.9960458305,2.0376918161\O,4.1272869772,-1.8799344856,4.8120684188\  
C,4.1691984986,-1.9772349679,6.2182260679\C,-0.3003702107,3.6397003885,3.8109408619\  
C,1.0190263015,3.1667229473,6.5686784806\H,1.6166812233,0.9341349767,4.9385270506\  
H,3.9090711358,-1.3910554683,2.3496596797\H,5.4847339281,1.1277864261,2.5048706428\  
H,4.4309847956,0.6500026334,1.1722635426\H,1.9792014486,0.8723869464,1.2034865648\  
H,1.9524355653,-0.8894505291,1.1991180366\H,-0.4901979843,0.9276711719,1.4018815256\  
H,-1.8084670644,-1.1637506664,1.2712317445\H,-0.3315925792,-2.1166468936,1.2338339068\  
H,-1.2430116576,-2.1135902793,3.5275068551\H,-1.2833672844,-0.3554426431,3.5379508503\  
H,1.2093644243,-2.1067284117,3.3702373929\H,0.7177524737,-1.138460748,4.7572315585\  
H,3.9402803733,-3.0156836289,6.4584984461\H,3.4316172709,-1.3224237979,6.69025197\  
H,5.1554157689,-1.7211488504,6.6143912543\H,4.8233333647,3.0044128755,1.2402415461\  
H,5.0465638217,3.5308467333,2.9210855305\H,1.9840465758,3.1251960551,7.0795324387\  
H,0.5964007219,2.1606754911,6.5443018731\H,0.3499240183,3.7947317738,7.1641361985\  
H,-0.5679835822,2.5833107833,3.75095933\H,-0.1326207143,4.0124552196,2.7973805372\  
H,-1.1492127798,4.1837548998,4.2348122469\H,2.5994607908,5.8250944517,5.5460891547\  
H,0.8897554185,6.2739605121,5.4711768481\H,1.8288486278,6.1216299471,3.9783023549\  
\Version=ES64L-G16RevB.01\HF=-1196.3348037\RMSD=3.409e-09\RMSF=2.266e-06\  
Dipole=-2.8863773,2.1873467,-1.1733159\Quadrupole=-21.5467343,23.463972,-1.9172377,10.5842777,-32.2769596,13.7449679\PG=C01 [X(C16H29N1O3Si1)]\@

### Product H

HF=-1196.3980578 a.u. (0)  
1\1\GINC-R01N25\FOpt\RPBE1PBE\def2TZVP\C16H29N1O3Si1\WURTHWE\28-Apr-2023\0\#  
pbe1pbe/def2tzvp opt=readfc geom=check guess=read Pop=NBO Freq emp=gd3bj  
scrf=(solvent=dichloroethane)\Product H\0,1\  
C,0.3943028959,-0.1880994083,0.2529938062\C,0.8926338063,-0.3145589769,1.6851438171\  
C,2.3441041587,0.1277357423,1.8012760879\C,2.5479646954,1.5287193048,1.2410238301\  
C,2.0570996449,1.6764545432,-0.210356308\C,0.5852985763,1.2298011594,-0.2638575549\  
C,2.9272995369,0.8496548806,-1.1172040716\C,3.4806479978,1.2925143603,-2.2578571917\  
N,3.278040743,2.55756271,-2.7760499805\C,2.1743190211,3.2721004245,-2.1799140732\  
C,2.2244795057,3.1514249052,-0.6643784582\C,1.2519266864,4.076759899,0.0167787294

O,0.1835302386,4.3487604744,-0.7350383142\C,-0.7980959757,5.1967640216,-0.1424173703\  
O,4.3221873779,0.5272707149,-2.9921143349\Si,5.888085446,0.1644780727,-2.4979905642\  
C,5.8744141186,-1.1645788359,-1.190790965\C,6.7110913354,-0.4460809485,-4.049811072\  
C,6.6718130114,1.7219173427,-1.8428109079\C,3.4068783969,2.7594195659,-4.201355428\  
O,1.4023550148,4.5301637141,1.1256886311\H,3.2167335918,3.4708078038,-0.331383809 \  
H,1.2130653232,2.898021805,-2.5601567424\H,2.249812134,4.3210662577,-2.4748701182\  
H,3.2020940144,-0.1471947112,-0.8034177174\H,3.6059952253,1.8068064351,1.2868705179\  
H,2.0046492635,2.2428108089,1.8681538506\H,0.2080516605,1.3181354046,-1.285841278\  
H,-0.0163550288,1.9032528278,0.3602091325\H,-0.6632177784,-0.4611968006,0.1930476257\  
H,0.9354852184,-0.8906368247,-0.3904966066\H,0.7779083025,-1.3422136325,2.0423496862\  
H,0.2723498184,0.3163672005,2.334378491\H,2.9848605727,-0.5872159523,1.2733602334\  
H,2.664290647,0.1068417441,2.8471874393\ H,5.2955296745,-2.0319032984,-1.518412579\  
H,5.4497351612,-0.8005212906,-0.2526718406\H,6.8972297805,-1.4971642213,-0.9906309386\  
H,6.1941622247,-1.3248714906,-4.4436655965\H,7.7481231188,-0.7270288612,-3.847975565\  
H,6.7120963249,0.3257489756,-4.8233100711\H,6.0995949506,2.1148848097,-0.9983353488\  
H,6.7188659633,2.4952103087,-2.6132106822\H,7.689326583,1.5206414713,-1.4970008686\  
H,2.5553054646,2.3455562403,-4.7618754863\H,3.4557333714,3.8317463888,-4.397763765\  
H,4.3188553825,2.2967024675,-4.5692596217\H,-1.5835523691,5.3053958229,-0.8859866709\  
H,-1.1950101414,4.7429594148,0.766217711\H,-0.3673363819,6.1683306436,0.1006975068  
[\Version=ES64L-G16](#) RevB.01\State=1-A\HF=-1196.3980578\RMSD=6.949e-09\RMSF=1.030e-  
06\Dipole=0.0241349,0.0692151,-0.9170283\Quadrupole=8.3336504,-1.3688935,-6.9647569,-  
6.5677954,-1.1686811,-7.2370345\PG=C01 [X(C16H29N1O3Si1)]\@

## wB97X-D

### 2-Silyloxy-1-azabutadiene G

HF=-890.7220245 a.u. (0)

1\1\GINC-R03N46\FOpt\RwB97XD\def2TZVP\C12H23N1O1Si1\WURTHWE\02-Jun-2023\0\#\  
wb97xd\def2tzvp opt=readfc geom=check guess=read freq pop=nbo scrf=(solvent=dichloroethane)\\  
2-Silyloxy-1-azabutadiene G)\0,1\  
C,-0.1157432857,-0.1548591947,0.3152843718\C,0.0414112552,-0.1932844074,1.8315098607\  
C,1.5099272659,-0.0364291842,2.2362538814\C,2.3828006171,-1.0504247892,1.547519768\  
C,2.2297282935,-1.0821110125,0.0533481016\C,0.7558649805,-1.214243087,-0.3496813106 \  
C,3.1676144103,-1.861277837,2.258387504\C,4.0482368873,-2.9275137199,1.7448892846\  
O,3.9715581622,-4.0941678034,2.4328030384\Si,2.5951591918,-5.033104276,2.6760585224\  
C,3.2625927007,-6.6799732601,3.2186376398\N,4.8539287398,-2.7646944631,0.7837505333\  
C,5.649302715,-3.905638802,0.3693373676\C,1.5045773993,-4.2882524694,3.9905007763\  
C,1.6951052806,-5.1315871542,1.0482535956\H,3.1363646322,-1.7979330194,3.3421881521\  
H,1.6227433146,-0.1077134005,3.3191576106\H,1.8461098893,0.9643700372,1.9395116576\  
H,2.8257682208,-1.8814220559,-0.3813619043\H,2.6196310063,-0.1397058942,-0.3489787409\  
H,0.671723571,-1.1530024235,-1.4365286875\H,0.3934427428,-2.206512362,-0.061030966\  
H,-1.1623915517,-0.3009249397,0.0396486862\H,0.1745014315,0.8357057487,-0.0520208728\  
H,-0.3338956648,-1.1494861887,2.2113501228\H,-0.5548837334,0.5922429796,2.300012886\  
H,2.3269182479,-5.5744311779,0.2754663977\H,1.3966468663,-4.1351202147,0.7141055482\  
H,0.7918418023,-5.7388875366,1.1399921599\H,3.9167555965,-7.1072333064,2.4562240779\  
H,2.444611156,-7.3814391208,3.3981042311\H,3.8329568263,-6.5832988633,4.144773916\  
H,1.0577041347,-3.3512699359,3.6540455581\H,2.0690044606,-4.0912531741,4.9044728631\  
H,0.6960832714,-4.9816784207,4.2361671696\H,6.21959093,-3.6380884908,-0.5193905441\  
H,6.3530802464,-4.2085597202,1.1504883763\H,5.0302388411,-4.7777182987,0.1360934573  
[\Version=ES64L-G16](#) RevB.01\State=1-A\HF=-890.7220245\RMSD=3.906e-09\RMSF=1.294e-  
06\Dipole=-1.3396005,-0.4397197,0.3511487\Quadrupole=-4.3128949,4.1179929,0.194902,-  
3.081276,0.7088866,-0.0351551\PG=C01 [X(C12H23N1O1Si1)]\@



### Methyl acrylate

HF=-306.4944189 a.u. (0)

```
1\1\GINC-R08N43\FOpt\RwB97XD\def2TZVP\C4H6O2\WURTHWE\21-Jun-2023\0\#wb97xd\def2tzvp Opt=readfc geom=check guess=read Pop=NBO Freq
scr=(solvent=dichloroethane)Fehler! Linkreferenz ungültig.)\0,1\
C,0.0165653325,0.,-0.0214305452\O,0.0236183004,0.,1.2284791057\
C,1.217857821,0.,-0.8470321165\C,2.436895482,0.,-0.3295563239\
O,-1.0998708906,0.,-0.7090655033\C,-2.3316482913,0.,0.0135928355\
H,1.0474295604,0.,-1.9158856531\H,2.5839570506,0.,0.7438279535\
H,3.3152289678,0.,-0.9614746723\H,-3.1151988969,0.,-0.7383153555\
H,-2.4065795838,-0.8890989716,0.6387761977\H,-2.4065795838,0.8890989716,0.6387761977
\Version=ES64L-G16RevB.01\State=1-A\HF=-306.4944189\RMSD=6.181e-09\RMSF=1.450e-05\
Dipole=-0.1240524,0.,-0.8118965\Quadrupole=6.395939,-2.2346709,-4.1612681,0.,-1.4490501,0.\
PG=CS [SG(C4H4O2),X(H2)]\@
```

### Van der Waals Complex

HF=-1197.2226717 a.u. (0)

```
1\1\GINC-R01N27\FOpt\RwB97XD\def2TZVP\C16H29N1O3Si1\WURTHWE\02-Jun-2023\0\#wb97xd\def2tzvp opt=readfc geom=check guess=read Pop=NBO Freq
scr=(solvent=dichloroethane)\ Van der Waals Complex\0,1\
C,-0.347088653,0.2109510344,-0.2249448731\C,-0.3694547697,0.2320736546,1.3006000481\
C,1.0187405474,-0.0257189349,1.8782371654\C,2.0508714349,0.9544479153,1.3090007431\
C,2.0356192029,0.9338890361,-0.1945156259\C,0.6815845486,1.2024541291,-0.7816866207\
C,3.1554771429,0.6750577007,-0.87421627\C,3.3465512485,0.6275745297,-2.3351947563\
N,2.4484786598,0.2526003063,-3.1467830767\C,2.7664675316,0.2785314946,-4.5601647845\
O,4.5575385738,1.0272954334,-2.7798005444\Si,6.1112568453,1.1015701321,-2.1485455861\
C,6.5357678994,-0.5269596329,-1.346348371\C,7.1746379446,1.3952864632,-3.6446170789\
C,6.2634313757,2.5181596544,-0.947841806\C,1.9720216103,3.8702483853,-2.7511147674\
C,2.8391346781,3.9745044382,-1.7554878341\C,2.4855027487,4.3500407649,-0.3701270225\
O,1.1969123766,4.6569627247,-0.2141459172\C,0.7807345573,5.0102058849,1.1036058402\
O,3.285689942,4.3742760482,0.5356416259\H,3.8882339286,3.7516261647,-1.8939934733\
H,0.9180011501,4.0711280581,-2.6111469284\H,2.2977508481,3.5645238557,-3.7369763263\
H,4.0602014362,0.529488247,-0.2940016371\H,3.0482980569,0.7305366425,1.6902021179\
H,1.7970344548,1.9667014671,1.6449477422\H,0.7138428951,1.1620176289,-1.8660392351\
H,0.3822521418,2.2138752848,-0.4831198266\H,-1.3351049968,0.4500919218,-0.6236379224\
H,-0.0968895543,-0.7960468585,-0.5738704029\H,-1.0773082485,-0.5085256901,1.6793786983\
H,-0.723230929,1.2122497085,1.6398542683\H,1.3289319589,-1.047033051,1.6347774708\
H,1.0011861085,0.0514477816,2.9673161531\H,6.3400457961,-1.3552530284,-2.0307393453\
H,5.9769622446,-0.7059967164,-0.4265216582\H,7.5995828407,-0.541847618,-1.0962820601\
H,7.0989248722,0.5651112776,-4.3495789055\H,8.2221247352,1.4984250128,-3.351697864\
H,6.8763852509,2.3108150168,-4.1596084085\H,5.4914107085,2.4984212673,-0.1767532487\
H,6.1971596322,3.4775385321,-1.4656934322\H,7.2379518886,2.4766286757,-0.4545804767\
H,1.9051829453,-0.0742708008,-5.1266023238\H,3.0162210623,1.2876152027,-4.9045664622\
H,3.6226865086,-0.3607489283,-4.7984596869\H,-0.2813026149,5.224904605,1.0298757767\
H,0.9505362321,4.1837443607,1.7936920364\H,1.3217562425,5.8884851386,1.4538116015
\Version=ES64L-G16RevB.01\State=1-A\HF=-1197.2226717\RMSD=3.694e-09\RMSF=1.076e-06\
Dipole=-0.0320444,0.3072481,0.2299585\Quadrupole=6.5486155,-5.7761647,-0.7724509,-8.3724917,-6.9233109,-2.9780033\
PG=C01 [X(C16H29N1O3Si1)]\@
```

### TS-C..N

HF=-1197.195086 a.u. (1, -355.0828 cm<sup>-1</sup>)

```

1\1\GINC-R07N15\FTS\RwB97XD\def2TZVP\C16H29N1O3Si1\WURTHWE\04-Jun-2023\0\#\#
wb97xd\def2tzvp Opt=(ts,noeigentest,calcf, maxstep=2) geom=check guess=read Pop=NBO Freq
scr=(solvent=dichloroethane)\ TS-C..N \0,1\
C,1.3691114641,3.2916793498,-1.4300566565\C,0.9047564426,3.3292564739,0.0218048516\
C,1.2219545289,2.0099555264,0.7311204383\C,0.6473886693,0.8383192535,-0.0116353927\
C,1.01644712,0.7826477393,-1.4654834079\C,0.7456922713,2.115481505,-2.1731050614\
C,-0.154429225,-0.0251167887,0.6121730588\C,-0.8770406738,-1.1225553027,-0.0367799334\
O,-2.1984689969,-1.1176598988,0.0546115937\Si,-3.3238120863,0.1396038419,0.2937416892\
C,-4.9414615188,-0.7387914419,0.0622988859\N,-0.298337678,-2.077528878,-0.6610634538\
C,-1.0875012792,-3.0572485533,-1.3796711795\C,-3.1696675874,0.8359133116,2.0113454287\
C,-3.0330871779,1.4380679467,-1.0032917733\C,1.4117284756,-2.6462236584,-0.3379572643\
C,1.8955427851,-2.462778171,0.9615216515\C,2.8397412438,-1.4828258865,1.3484530659\
O,3.2752871767,-1.3041280182,2.4843484241\O,3.318593203,-0.7200082457,0.3140727353\
C,4.3854814791,0.1556256074,0.6211695186\H,1.5417980566,-3.103788583,1.7584110779\
H,1.9136684933,-2.108591956,-1.1341710006\H,1.1420505658,-3.6598694223,-0.6182778478\
H,-0.4003281648,0.1282505793,1.6567052417\H,0.864839347,2.0229619991,1.7614686881\
H,2.3090377084,1.8887672005,0.7638934565\H,0.5023556723,-0.0305061623,-1.9754320195\
H,2.0875968119,0.5614039315,-1.512837754\H,1.1286393447,2.0620673041,-3.1939829416\
H,-0.3347843197,2.2695288265,-2.25096453\H,1.1183724145,4.2283197468,-1.9322536613\
H,2.4604690168,3.1989815381,-1.4552458838\H,-0.1752123942,3.5081066433,0.0560973057\
H,1.3799208484,4.1537921931,0.5563702216\H,-2.9806285506,0.998166019,-2.0011794286\
H,-2.105129624,1.9790728088,-0.8143684762\H,-3.852974125,2.1602092481,-0.9936381788\
H,-5.0096555021,-1.1798923058,-0.933854048\H,-5.7707422809,-0.0380686478,0.1819395421\
H,-5.0621243417,-1.5348312244,0.7996616079\H,-2.300268617,1.4866795932,2.113146592\
H,-3.0981851806,0.0406724654,2.7560454044\H,-4.0602248834,1.4278463064,2.2377164479\
H,-0.448995267,-3.5359427269,-2.1217903625\H,-1.4684151099,-3.8256879398,-0.7030353293\
H,-1.9323238827,-2.5914407698,-1.8841567429\H,4.5401610319,0.7666798378,-0.2670593931\
H,4.152210727,0.7937042482,1.4740199829\H,5.2990558933,-0.3996798531,0.8453077848
\Version=ES64L-G16RevB.01\State=1-AHF=-1197.195086\RMSD=6.129e-09\RMSF=2.032e-
06\Dipole=-3.5152456,1.5957861,-2.5166761\Quadrupole=-0.4612931,5.7456345,-
5.2843415,11.1257556,-14.1527565,8.8979888\PG=C01 [X(C16H29N1O3Si1)]\@

```

### Dipolar Intermediate

HF=-1197.2067355 a.u (0)

```

1\1\GINC-R09N15\FOpt\RwB97XD\def2TZVP\C16H29N1O3Si1\WURTHWE\03-Jun-2023\0\#\#
wb97xd\def2tzvp opt=(maxstep=3) geom=check guess=read Pop=NBO Freq
scr=(solvent=dichloroethane)\ Dipolar Intermediate \0,1\
H,-1.9807880399,3.0984567105,2.4157143132\C,-2.2777779485,2.5854549137,1.4997690843\
C,-1.0173949938,2.1391396179,0.7478520027\C,-1.3580845934,1.5425607991,-0.5865922975\
C,-2.2590197378,2.38819605,-1.4391230829\C,-3.5190941313,2.8053300338,-0.6741490239\
C,-3.1621593505,3.4839981825,0.6433801526\C,-0.9513889486,0.344950799,-1.0113544273\
C,-0.1466966551,-0.6117939162,-0.2429864829\O,-0.6475927298,-1.796204026,-0.0112274312\
Si,-2.2570661815,-2.3939886455,0.0279216152\C,-2.0113668403,-4.086920078,0.7375150001\
N,1.050568383,-0.3837468792,0.192487606\C,1.8836146564,0.8274607503,-0.1815788231\
C,3.1615298284,0.4820797869,-0.8206128621\C,4.3247985513,0.3941818657,-0.073111911\
O,4.4636767881,0.5315176234,1.158339991\C,1.7237276539,-1.3898478486,1.0116926064\
H,1.9518719472,-2.2754301891,0.4205397105\O,5.4481161416,0.1188486935,-0.8420921806\
C,6.6672463105,-0.0053471982,-0.1432060258\C,-3.2498927392,-1.2846700786,1.1368599563\
C,-2.9333412487,-2.4549081879,-1.7005152767\H,-1.2966499525,-0.0376078357,-1.9653913888\
H,3.1911063085,0.3054452734,-1.8867993789\H,2.0425958467,1.355372923,0.7603819058\
H,1.2434599381,1.4326430704,-0.8175280831\H,-0.4391762502,1.4497420782,1.3614419917\
H,-0.3839202422,3.0151787437,0.5674860024\H,-2.8444378934,1.7001177577,1.8029422955\
H,-4.0699405246,3.7448785759,1.1906284636\H,-2.6350727235,4.4211679306,0.4356006788\
H,-4.1187968422,3.4686140037,-1.2994043208\H,-4.1291438468,1.918103501,-0.4752275791\

```

H,-1.7050252824,3.2917103013,-1.718385509\H,-2.5161748379,1.8657027767,-2.360906944\  
H,7.4280041791,-0.2089924129,-0.8962052167\H,6.6419494803,-0.8277558256,0.5758518898\  
H,6.9250005383,0.9107659306,0.3927690227\H,1.077611976,-1.6751916924,1.8399637138\  
H,2.6469030095,-0.9507319923,1.3796034848\H,-2.2167218732,-2.9056189183,-2.3896876988\  
H,-3.2023594095,-1.4655735294,-2.0726447214\H,-3.8365184843,-3.0703169413,-  
1.7067132888\ H,-3.4344101188,-0.3179845767,0.6671146698\H,-2.7418806466,-  
1.1180905222,2.08875102\  
H,-4.2167907262,-1.7483302205,1.3461599907\H,-1.3629838292,-4.6878311175,0.0971629537\  
H,-2.9717884809,-4.5996740331,0.8244212764\H,-1.5621675127,-4.0341788179,1.730797853  
\Version=ES64L-G16RevB.01\State=1-A\HF=-1197.2067355\RMSD=8.589e-09\RMSF=4.865e-  
06\Dipole=-6.7328895,-1.0295256,-0.2377256\Quadrupole=-21.6183469,17.1851749,4.4331721,-  
5.1942222,-0.8684421,-1.5299357\PG=C01 [X(C16H29N1O3Si1)]\@

### TS-C..C

HF=-1197.1962805 a.u (1, -182.3315 cm<sup>-1</sup>)  
I\1\GINC-R03N47\FTS\RwB97XD\def2TZVP\C16H29N1O3Si1\WURTHWE\07-Jun-2023\0\#\  
wb97xd\def2tzvp Opt=(ts,noeigentest,readfc,maxstep=4) geom=check guess=read nosym freq  
pop=nbo scrf=(solvent=dichloroethane)\TS-C..C\0,1\  
H,-0.1094819331,0.0750984546,0.1373962139\C,-0.0236835711,0.0369441489,1.2251868061\  
C,1.4657352154,0.0301788975,1.6076211001\C,1.5771041757,-0.0509717261,3.1070371293\  
C,0.898477514,-1.2573546331,3.6878742156\C,-0.5833279141,-1.287520828,3.2888303277\  
C,-0.7495044549,-1.1850713003,1.7765981119\C,1.8428519215,1.0099146284,3.9128994672\  
C,2.6753611018,2.0976803582,3.5530455127\O,2.5472533125,3.2646747273,4.1599954996\  
Si,1.1626737066,4.0028516526,4.8206808556\C,1.6686118579,5.7855075854,4.919991682\  
N,3.6323008835,2.015294982,2.653363345\C,4.4334639834,0.7675182242,2.2947248862\  
C,4.115838272,-0.53249636,2.8993155359\C,4.3019240798,-0.7202582184,4.2641577093\  
O,4.5560215356,0.1641462354,5.0941886449\C,4.317781583,3.2335576573,2.2472979764\  
H,3.6044397568,4.043980748,2.1255575225\O,4.1086029143,-2.0203292639,4.6821854801\  
C,4.1716386254,-2.2408004561,6.0757986583\C,-0.2578646041,3.7368363149,3.6506089123\  
C,0.8248231303,3.3016237355,6.5092219078\H,1.5676160191,0.9654075329,4.9587294379\  
H,3.9070559403,-1.375013266,2.2595223915\H,5.4425273723,1.0937578405,2.5688118493\  
H,4.3925567071,0.7094334861,1.2059244121\H,1.951845402,0.9182347451,1.2114600323\  
H,1.9382349509,-0.8424456182,1.1528792016\H,-0.4891824814,0.9477307205,1.6152366514\  
H,-1.8094035814,-1.14345056,1.5166599557\H,-0.342107802,-2.0867633964,1.306832387\  
H,-1.0437379574,-2.2025817726,3.6662156103\H,-1.0962438995,-0.4481581882,3.7694203589\  
H,1.3948605389,-2.1491949911,3.2957872224\H,1.0099780292,-1.2741023857,4.7721997113\  
H,4.0017269061,-3.3064442224,6.2217412593\H,3.4036421912,-1.674160439,6.6072505081\  
H,5.1468797298,-1.9681146003,6.4841928227\H,4.8096377202,3.0425685387,1.2946871018\  
H,5.0700479294,3.5324008623,2.9799321401\H,1.736281408,3.2767519609,7.1096876141\  
H,0.4144038543,2.2920153665,6.4627429726\H,0.0982855734,3.9341488491,7.0255333735\  
H,-0.5452064411,2.6853131105,3.6059840275\H,-0.0006625592,4.0668505194,2.6418120179\  
H,-1.1235203493,4.3139376895,3.9845300617\H,2.5485420363,5.9056348861,5.5549825296\  
H,0.8605413446,6.3855886602,5.3442258848\H,1.9029332675,6.1813798343,3.9299690583\  
\Version=ES64L-G16RevB.01\HF=-1197.1962805\RMSD=8.224e-09\RMSF=1.972e-06\Dipole=-  
2.48163,2.0333934,-1.2065564\Quadrupole=-17.8679285,22.4893226,-4.6213941,9.4554386,-  
29.6541719,12.0771089\PG=C01 [X(C16H29N1O3Si1)]\@

### Product H

HF=-1197.2630028 a.u (0)  
I\1\GINC-R04N05\FOpt\RwB97XD\def2TZVP\C16H29N1O3Si1\WURTHWE\02-Jun-2023\0\#\  
wb97xd\def2tzvp Opt=readfc geom=check guess=read Pop=NBO Freq  
scrf=(solvent=dichloroethane)\Product H\0,1\

C,1.7254074859,0.0627152618,-0.6347953519\C,1.3384956483,-1.279401199,0.0536824108\  
C,0.1131155627,-1.9083393899,-0.6023651074\N,-1.0382505127,-1.0444569478,-0.4485680105\  
C,-0.7894322985,0.2854512858,-0.75112247\C,0.4366690841,0.8127785504,-0.8693602981\  
C,2.6282294536,0.8845367149,0.3110148711\C,2.495988664,-0.1716945248,-1.951681781\  
C,2.9595272728,1.1316769242,-2.5955049322\C,3.8446246328,1.9270987359,-1.6404841451\  
C,3.1347403324,2.1826269341,-0.3141597693\O,-1.9068496614,1.0378723046,-0.8918482411\  
Si,-2.4384333826,2.1064337147,0.2909439728\C,-1.3737443123,3.6362754686,0.3059588568\  
C,-4.1826540762,2.5069195053,-0.2124272165\C,-2.3577154603,1.2412579656,1.9387922751\  
C,-2.2825651604,-1.6390355518,-0.8957869675\C,2.4999710913,-2.2416764444,0.1407399103\  
O,3.3555616566,-2.2005149778,0.9909301014\O,2.493438376,-3.1529662762,-0.8328481671\  
C,3.5805378196,-4.0780294407,-0.8487851735\H,1.0796532398,-1.0408736478,1.0881295302\  
H,0.3098638785,-2.1105252818,-1.6637474524\H,-0.1139635325,-2.8640623843,-0.128107619\  
H,0.4870526732,1.8719980235,-1.0727522125\H,2.0762555277,1.0992453695,1.2303215854\  
H,3.4896062197,0.2727215949,0.5926738791\H,1.875949804,-0.7396605811,-2.6480769669\  
H,3.3849975624,-0.7788829088,-1.7445507196\H,3.5025662079,0.9094168368,-3.5167873215\  
H,2.0910660765,1.7329995504,-2.8810262821\H,4.1458442824,2.8725361276,-2.097325432\  
H,4.762705016,1.3592264755,-1.4513437672\H,2.3021897311,2.8741757909,-0.4754891919\  
H,3.8112746526,2.6779490459,0.386026603\H,-1.3155560391,4.0852081709,-0.6879221315\  
H,-0.3595796642,3.4082870183,0.6396808503\H,-1.7950789336,4.3784796253,0.9887695742\  
H,-4.2075338108,2.9655765777,-1.2031098172\H,-4.6328466901,3.2072306539,0.4948363715\  
H,-4.7989544791,1.6059285711,-0.2368473126\H,-1.3351621536,0.9249537297,2.1575683688\  
H,-2.9973609009,0.356578178,1.9523898542\H,-2.6824974536,1.910744811,2.738715156\  
H,-2.4054103294,-2.601075516,-0.3980271215\H,-3.1240459229,-1.004732176,-0.6326964913\  
H,-2.2980740498,-1.8075157925,-1.9815020734\H,3.4024825195,-4.7277170137,-1.7006186086\  
H,4.5265226414,-3.5502106419,-0.9660182149\H,3.6022467114,-4.6583118207,0.0728401963  
\Version=ES64L-G16RevB.01\State=1-A\HF=-1197.2630028\RMSE=6.779e-09\RMSF=9.853e-  
07\Dipole=-0.7492169,-0.3851547,-0.3886102\Quadrupole=-1.1788176,7.9574593,-6.7786417,-  
2.246975,-8.3288225,5.8144106\PG=C01 [X(C16H29N1O3Si1)]\@

## References

- (1) Pedersen, D.; Rosenbohm, C. Dry Column Vacuum Chromatography. *Synthesis* **2001**, *2001* (16). DOI: 10.1055/s-2001-18722.
- (2) Pauli, G. F. qNMR - a versatile concept for the validation of natural product reference compounds. *Phytochem. Anal.* **2001**, *12* (1), 28–42. DOI: 10.1002/1099-1565(200101/02)12:1<28:AID-PCA549>3.0.CO;2-D.
- (3) Zhang, W.-C.; Li, C.-J. Diastereoselective Synthesis of 2,4-Disubstituted Tetrahydropyrans and Ethers via a Prins-Type Cyclization Catalyzed by Scandium Triflate. *Tetrahedron* **2000**, *56* (16), 2403–2411. DOI: 10.1016/S0040-4020(00)00152-6.
- (4) Yadav, J.; Subba Reddy, B.; Narayana Kumar, G.; Aravind, S. The 'Aqueous' Prins Cyclization: A Diastereoselective Synthesis of 4-Hydroxytetrahydropyran Derivatives. *Synthesis* **2008**, *2008* (3), 395–400. DOI: 10.1055/s-2007-1000932.
- (5) Bora, S. K.; Shit, S.; Sahu, A. K.; Saikia, A. K. Diastereoselective Synthesis of 2,6-Disubstituted Tetrahydropyranones via Prins Cyclization of 3-Bromobut-3-en-1-ols and Aldehydes. *J. Org. Chem.* **2023**, *88* (5), 3012–3021. DOI: 10.1021/acs.joc.2c02715. Published Online: Feb. 22, 2023.
- (6) Reddy, B. V. S.; Anjum, S. R.; Sridhar, B. A novel self-terminated Prins strategy for the synthesis of tetrahydropyran-4-one derivatives and their behaviour in Fisher indole synthesis. *RSC Adv.* **2016**, *6* (79), 75133–75137. DOI: 10.1039/C6RA11218H.
- (7) Roberti, M.; Schipani, F.; Bagnolini, G.; Milano, D.; Giacomini, E.; Falchi, F.; Balboni, A.; Manerba, M.; Farabegoli, F.; Franco, F. de; Robertson, J.; Minucci, S.; Pallavicini, I.; Di Stefano, G.; Giroto, S.; Pellicciari, R.; Cavalli, A. Rad51/BRCA2 disruptors inhibit homologous recombination and synergize with olaparib in pancreatic cancer cells. *Eur. J. Med. Chem.* **2019**, *165*, 80–92. DOI: 10.1016/j.ejmech.2019.01.008. Published Online: Jan. 10, 2019.
- (8) Kojima, S.; Inai, H.; Hidaka, T.; Fukuzaki, T.; Ohkata, K. Z-selective synthesis of alpha,beta-unsaturated amides with triphenylsilylacetamides. *J. Org. Chem.* **2002**, *67* (12), 4093–4099. DOI: 10.1021/jo0161936.
- (9) Bradford, M. M. A rapid and sensitive method for the quantitation of microgram quantities of protein utilizing the principle of protein-dye binding. *Anal. Biochem.* **1976**, *72*, 248–254. DOI: 10.1006/abio.1976.9999.
- (10) Stoscheck, C. M. Quantitation of protein. *Methods Enzymol.* **1990**, *182*, 50–68. DOI: 10.1016/0076-6879(90)82008-P.
- (11) Cheng, Y.; Prusoff, W. H. Relationship between the inhibition constant (K<sub>1</sub>) and the concentration of inhibitor which causes 50 per cent inhibition (I<sub>50</sub>) of an enzymatic reaction. *Biochem. Pharmacol.* **1973**, *22* (23), 3099–3108. DOI: 10.1016/0006-2952(73)90196-2.

- (12) Mach, R. H.; Smith, C. R.; Childers, S. R. Ibogaine possesses a selective affinity for sigma 2 receptors. *Life Sci.* **1995**, *57* (4), PL57-62. DOI: 10.1016/0024-3205(95)00301-I.
- (13) Schepmann, D.; Frehland, B.; Lehmkuhl, K.; Tewes, B.; Wünsch, B. Development of a selective competitive receptor binding assay for the determination of the affinity to NR2B containing NMDA receptors. *J. Pharm. Biomed. Anal.* **2010**, *53* (3), 603–608. DOI: 10.1016/j.jpba.2010.04.014. Published Online: Apr. 18, 2010.
- (14) Frisch, M. J.; Trucks, G. W.; Schlegel, H. B.; Scuseria, G. E.; Robb, M. A.; Cheeseman, J. R.; Scalmani, G.; Barone, V.; Petersson, G. A.; Nakatsuji, H.; Li, X.; Caricato, M.; Marenich, A. V.; Bloino, J.; Janesko, B. G.; Gomperts, R.; Mennucci, B.; Hratchian, H. P.; Ortiz, J. V.; Izmaylov, A. F.; Sonnenberg, J. L.; Williams-Young, D.; Ding, F.; Lipparini, F.; Egidi, F.; Goings, J.; Peng, B.; Petrone, A.; Henderson, T.; Ranasinghe, D.; Zakrzewski, V. G.; Gao, J.; Rega, N.; Zheng, G.; Liang, W.; Hada, M.; Ehara, M.; Toyota, K.; Fukuda, R.; Hasegawa, J.; Ishida, M.; Nakajima, T.; Honda, Y.; Kitao, O.; Nakai, H.; Vreven, T.; Throssell, V.; Montgomery, Jr., J. A.; Peralta, J. E.; Ogliaro, F.; Bearpark, M. J.; Heyd, J. J.; Brothers, E. N.; Kudin, K. N.; Staroverov, V. N.; Keith, T. A.; Kobayashi, R.; Normand, J.; Raghavachari, K.; Rendell, A. P.; Burant, J. C.; Iyengar, S. S.; Tomasi, J.; Cossi, V.; Millam, J. M.; Klene, M.; Adamo, C.; Cammi, R.; Ochterski, J. W.; Martin, R. L.; Morokuma, K.; Farkas, O.; Foresman, J. B.; Fox, D. J. *Gaussian 16*; Gaussian, Inc., 2016.
- (15) Becke, A. D. Density-functional thermochemistry. III. The role of exact exchange. *J. Chem. Phys.* **1993**, *98* (7), 5648–5652. DOI: 10.1063/1.464913.
- (16) Lee, C.; Yang, W.; Parr, R. G. Development of the Colle-Salvetti correlation-energy formula into a functional of the electron density. *Phys. Rev. B Condens. Matter* **1988**, *37* (2), 785–789. DOI: 10.1103/physrevb.37.785.
- (17) Grimme, S.; Ehrlich, S.; Goerigk, L. Effect of the damping function in dispersion corrected density functional theory. *J. Comput. Chem.* **2011**, *32* (7), 1456–1465. DOI: 10.1002/jcc.21759. Published Online: Mar. 1, 2011.
- (18) Grimme, S.; Hansen, A.; Brandenburg, J. G.; Bannwarth, C. Dispersion-Corrected Mean-Field Electronic Structure Methods. *Chem. Rev.* **2016**, *116* (9), 5105–5154. DOI: 10.1021/acs.chemrev.5b00533. Published Online: Apr. 14, 2016.
- (19) Tao, J.; Perdew, J. P.; Staroverov, V. N.; Scuseria, G. E. Climbing the density functional ladder: nonempirical meta-generalized gradient approximation designed for molecules and solids. *Phys. Rev. Lett.* **2003**, *91* (14), 146401. DOI: 10.1103/PhysRevLett.91.146401. Published Online: Sep. 30, 2003.
- (20) Perdew, J. P.; Burke, K.; Ernzerhof, M. Generalized Gradient Approximation Made Simple. *Phys. Rev. Lett.* **1996**, *77* (18), 3865–3868. DOI: 10.1103/PhysRevLett.77.3865.

- (21) Perdew, J. P.; Burke, K.; Ernzerhof, M. Generalized Gradient Approximation Made Simple [Phys. Rev. Lett. 77, 3865 (1996)]. *Phys. Rev. Lett.* **1997**, *78* (7), 1396. DOI: 10.1103/PhysRevLett.78.1396.
- (22) Adamo, C.; Barone, V. Toward reliable density functional methods without adjustable parameters: The PBE0 model. *J. Chem. Phys.* **1999**, *110* (13), 6158–6170. DOI: 10.1063/1.478522.
- (23) Ernzerhof, M.; Scuseria, G. E. Assessment of the Perdew–Burke–Ernzerhof exchange–correlation functional. *J. Chem. Phys.* **1999**, *110* (11), 5029–5036. DOI: 10.1063/1.478401.
- (24) Chai, J.-D.; Head-Gordon, M. Long-range corrected hybrid density functionals with damped atom–atom dispersion corrections. *Phys. Chem. Chem. Phys.* **2008**, *10* (44), 6615–6620. DOI: 10.1039/b810189b. Published Online: Sep. 29, 2008.
- (25) Weigend, F.; Ahlrichs, R. Balanced basis sets of split valence, triple zeta valence and quadruple zeta valence quality for H to Rn: Design and assessment of accuracy. *Phys. Chem. Chem. Phys.* **2005**, *7* (18), 3297–3305. DOI: 10.1039/b508541a. Published Online: Aug. 4, 2005.
- (26) Tomasi, J.; Mennucci, B.; Cammi, R. Quantum mechanical continuum solvation models. *Chem. Rev.* **2005**, *105* (8), 2999–3093. DOI: 10.1021/cr9904009.

# NMR Spectra

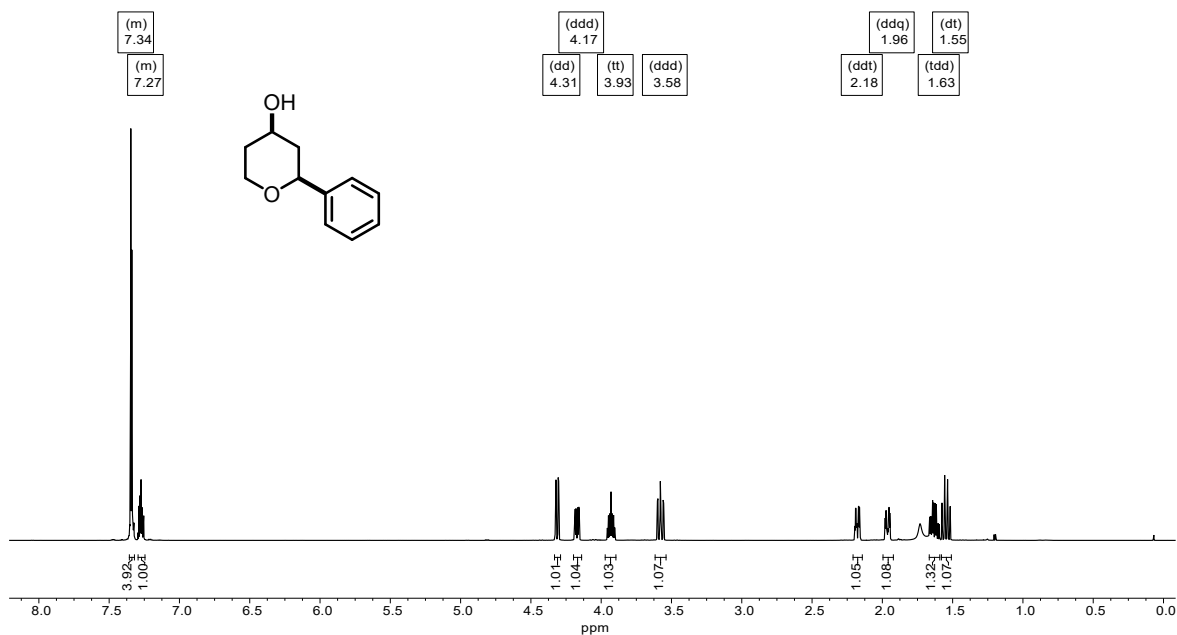

<sup>1</sup>H NMR spectrum of *cis*-2-Phenyltetrahydro-2H-pyran-4-ol in CDCl<sub>3</sub>.

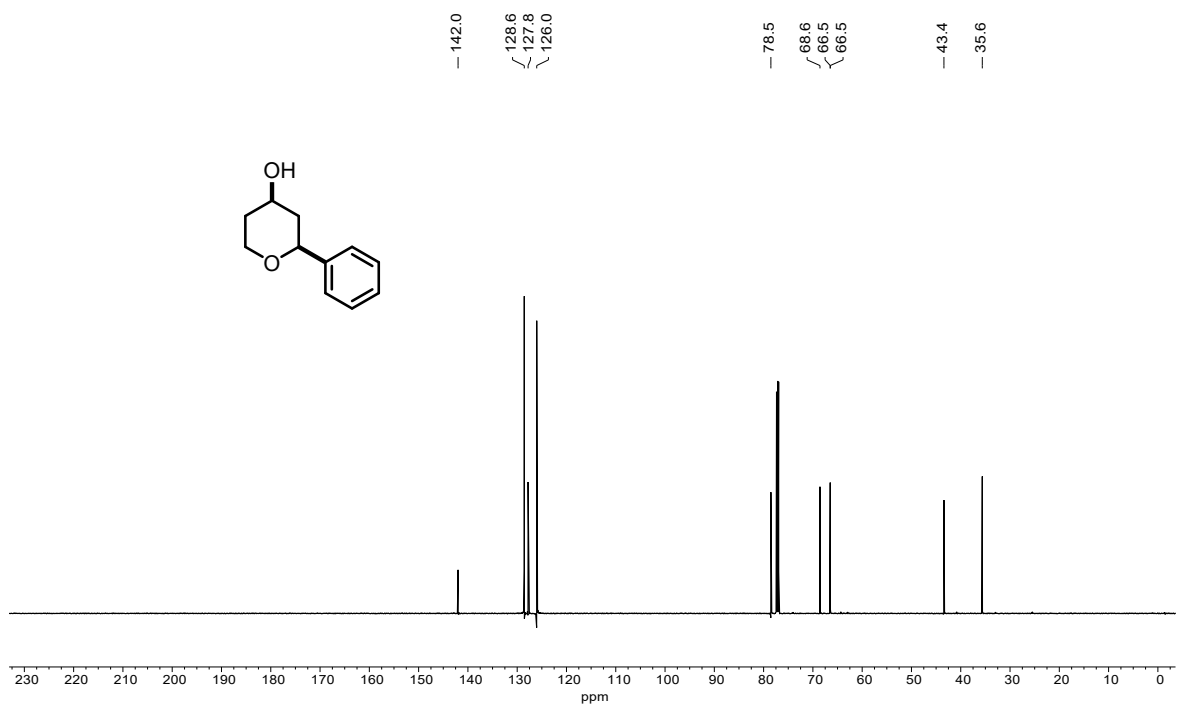

<sup>13</sup>C NMR spectrum of *cis*-2-Phenyltetrahydro-2H-pyran-4-ol in CDCl<sub>3</sub>.



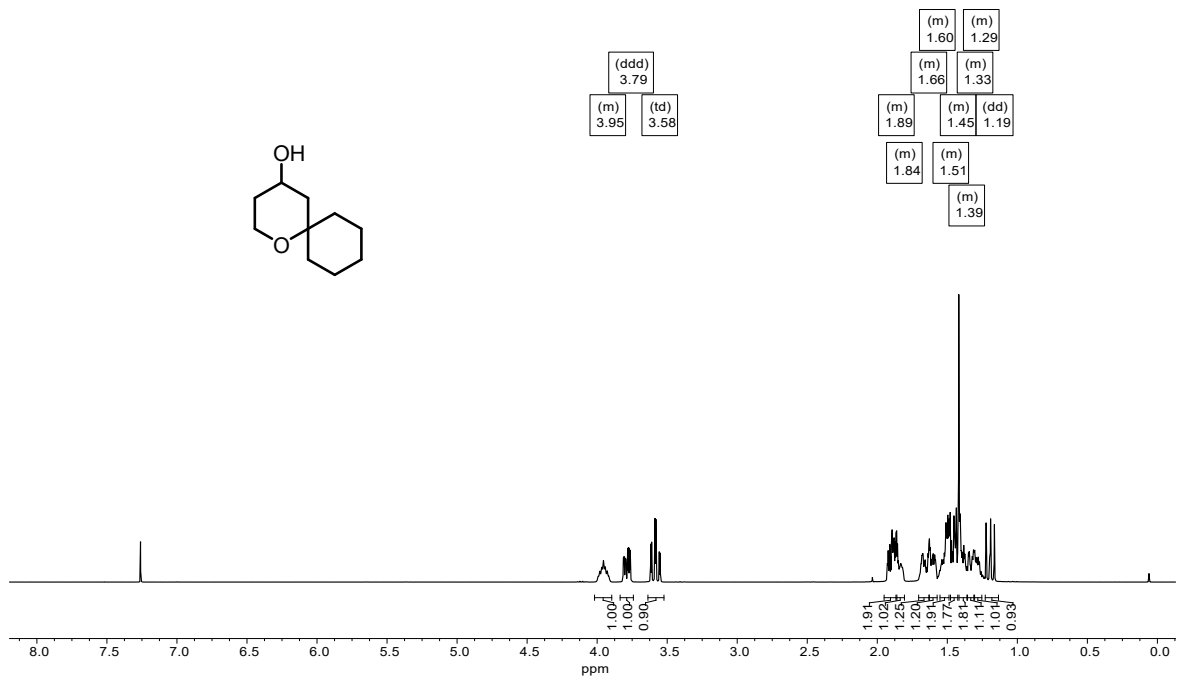

<sup>1</sup>H NMR spectrum of (RS)-1-Oxaspiro[5.5]undecan-4-ol in CDCl<sub>3</sub>.

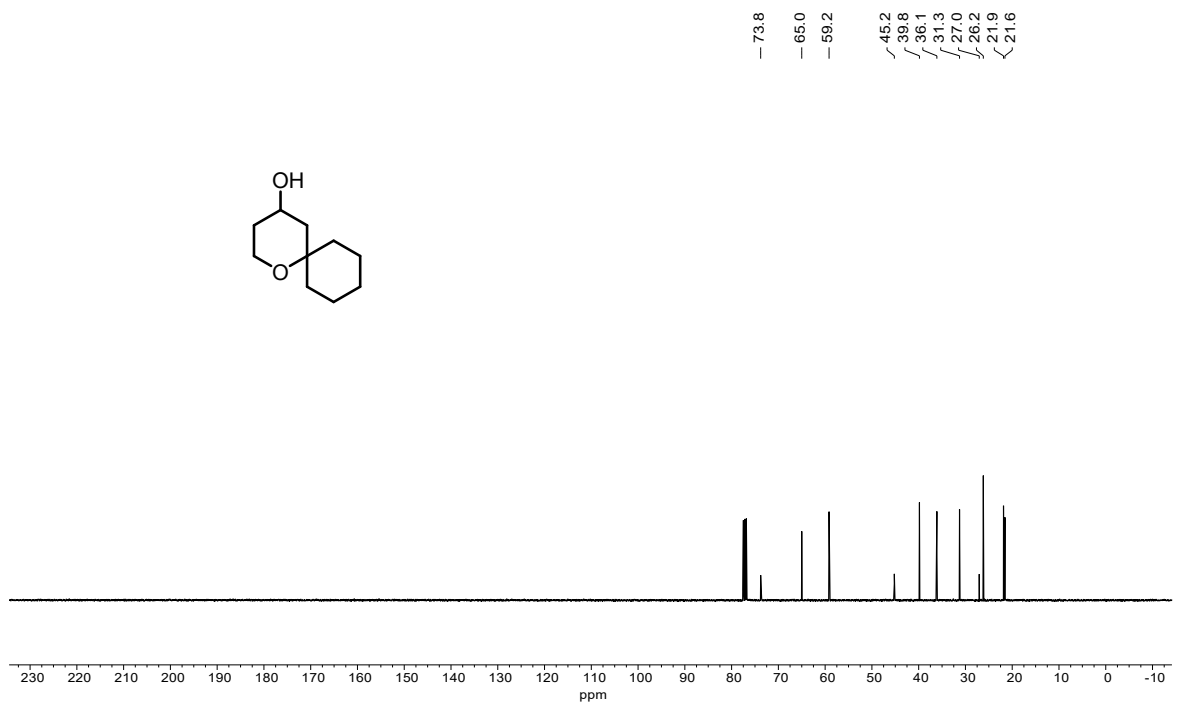

<sup>13</sup>C NMR spectrum of (RS)-1-Oxaspiro[5.5]undecan-4-ol in CDCl<sub>3</sub>.

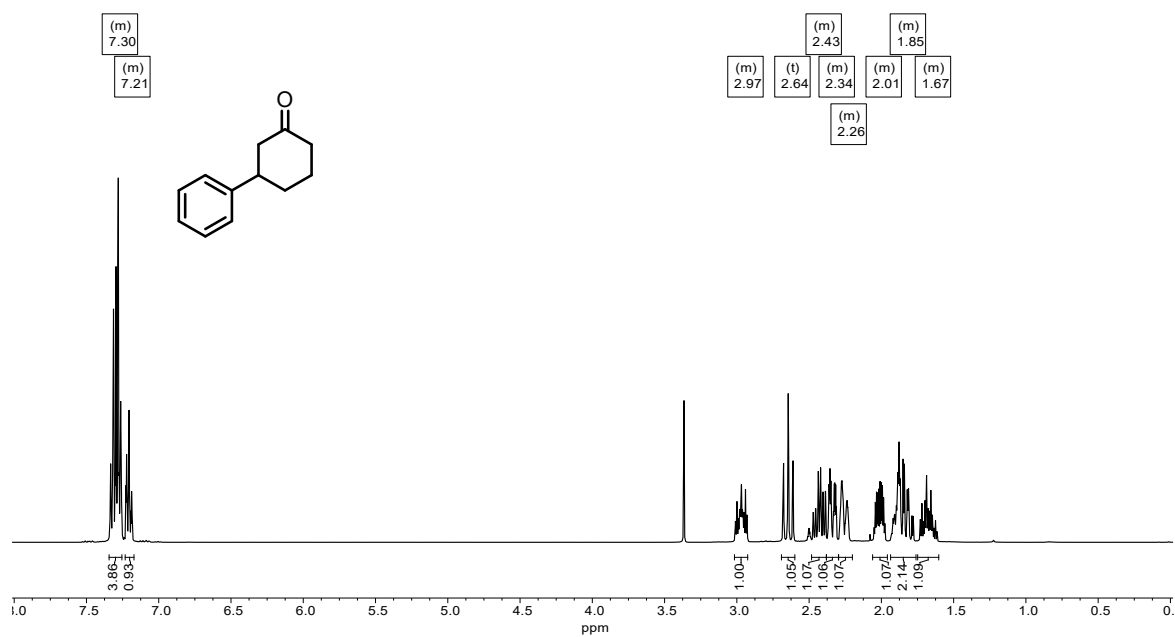

<sup>1</sup>H NMR spectrum of **3** in CDCl<sub>3</sub>.

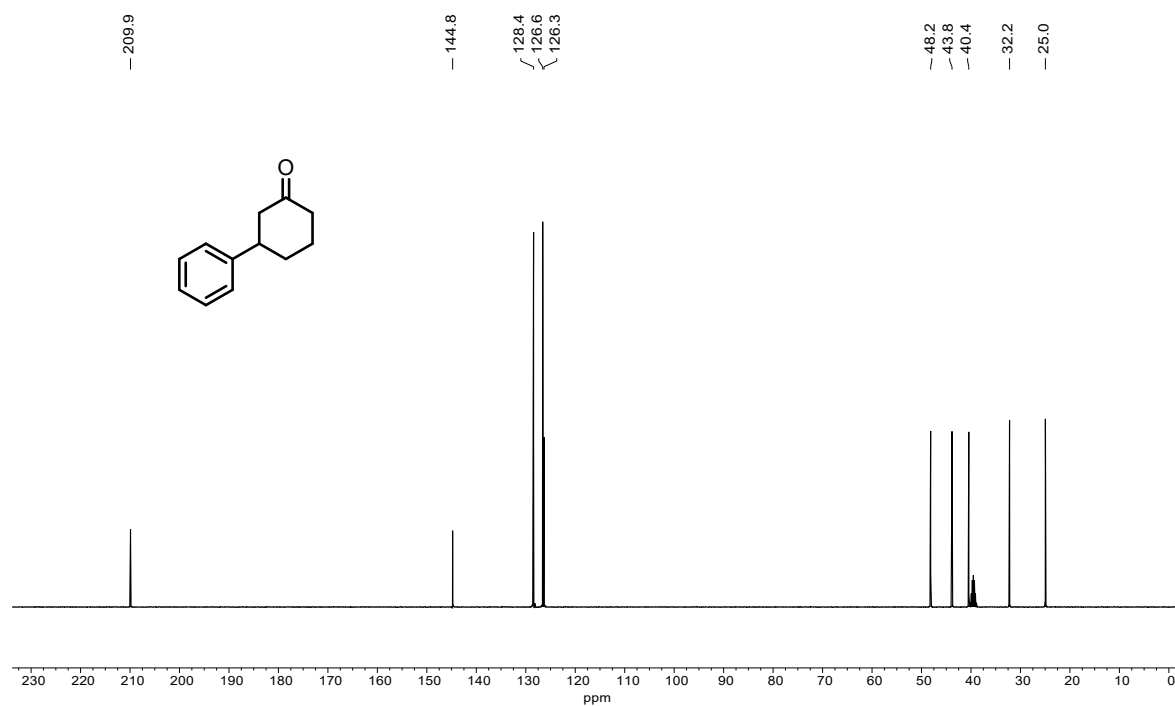

<sup>13</sup>C NMR spectrum of **3** in CDCl<sub>3</sub>.

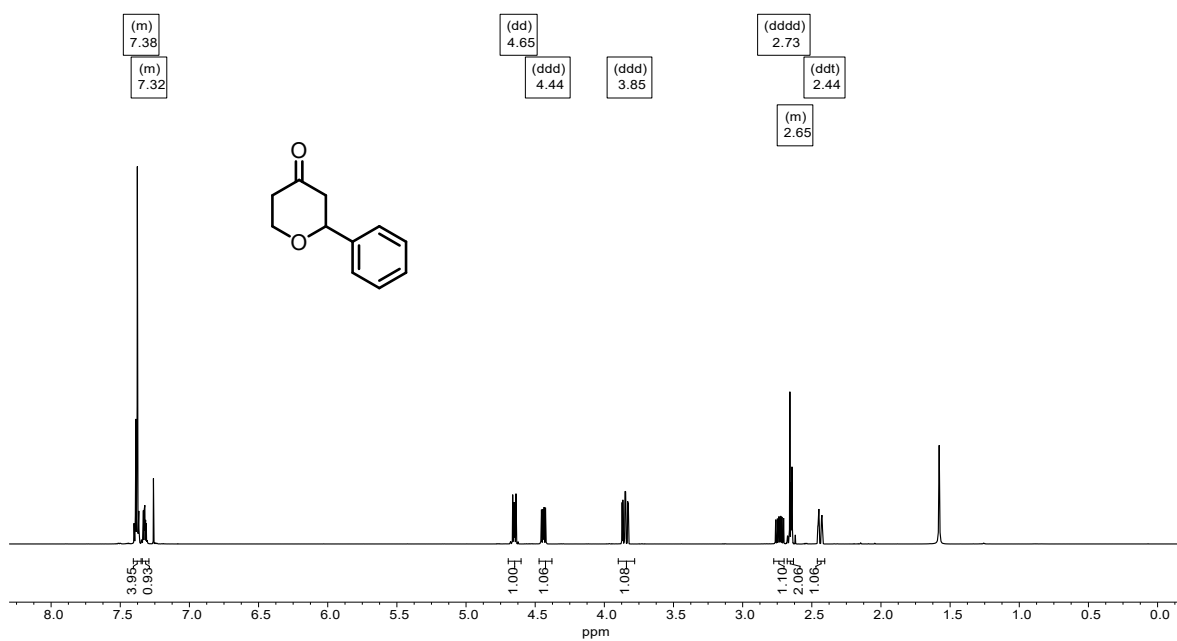

<sup>1</sup>H NMR spectrum of **9** in CDCl<sub>3</sub>.

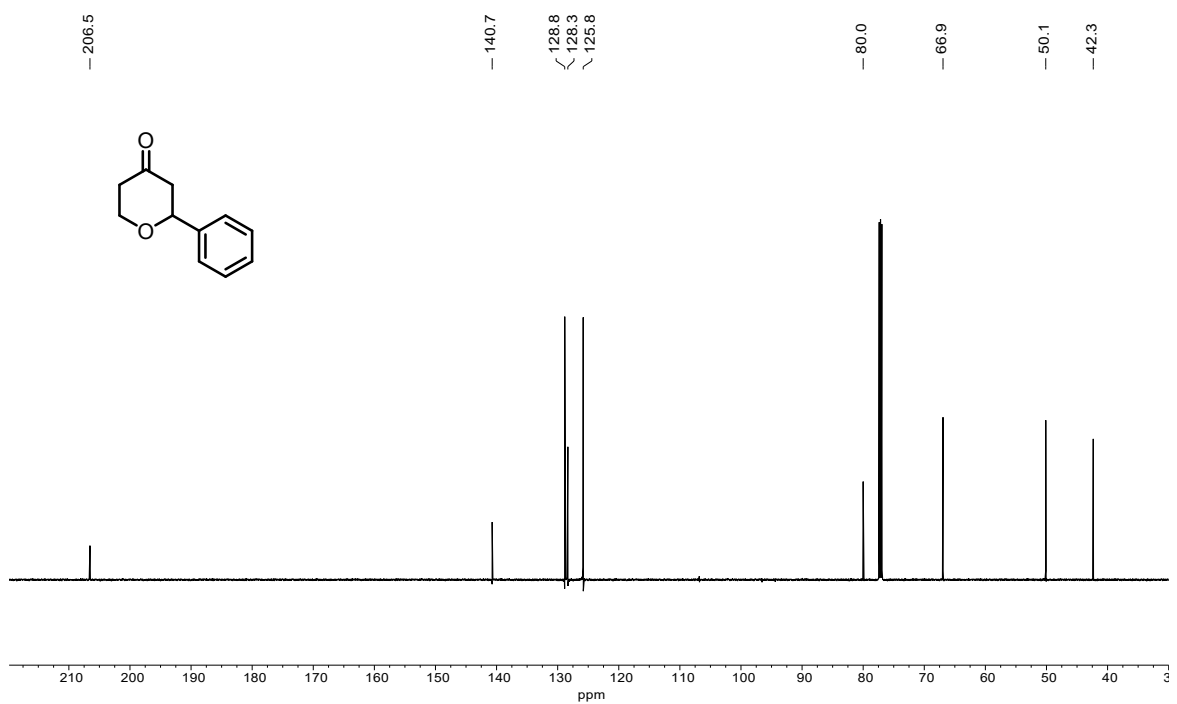

<sup>13</sup>C NMR spectrum of **9** in CDCl<sub>3</sub>.

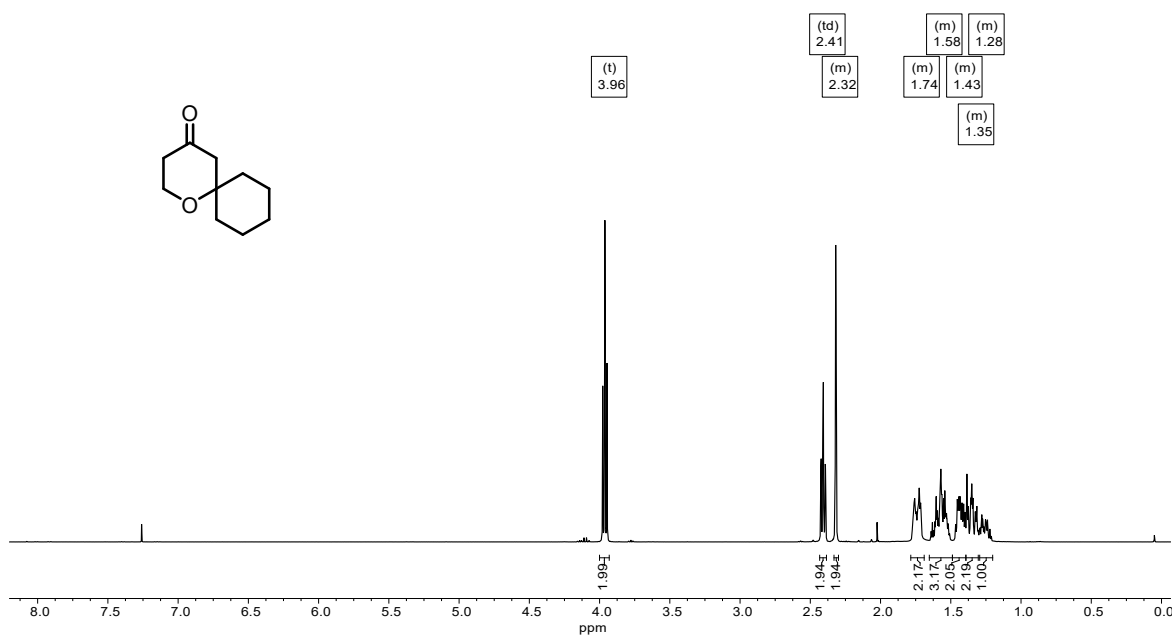

**<sup>1</sup>H NMR spectrum of **10** in CDCl<sub>3</sub>.**

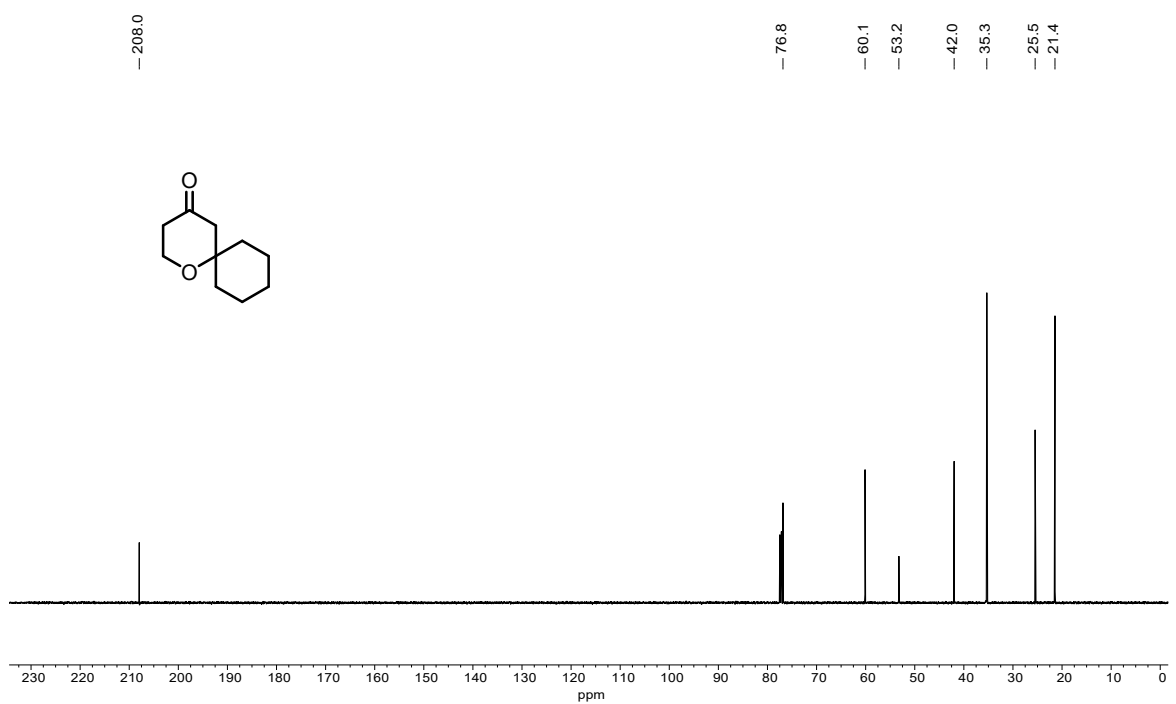

**<sup>13</sup>C NMR spectrum of **10** in CDCl<sub>3</sub>.**

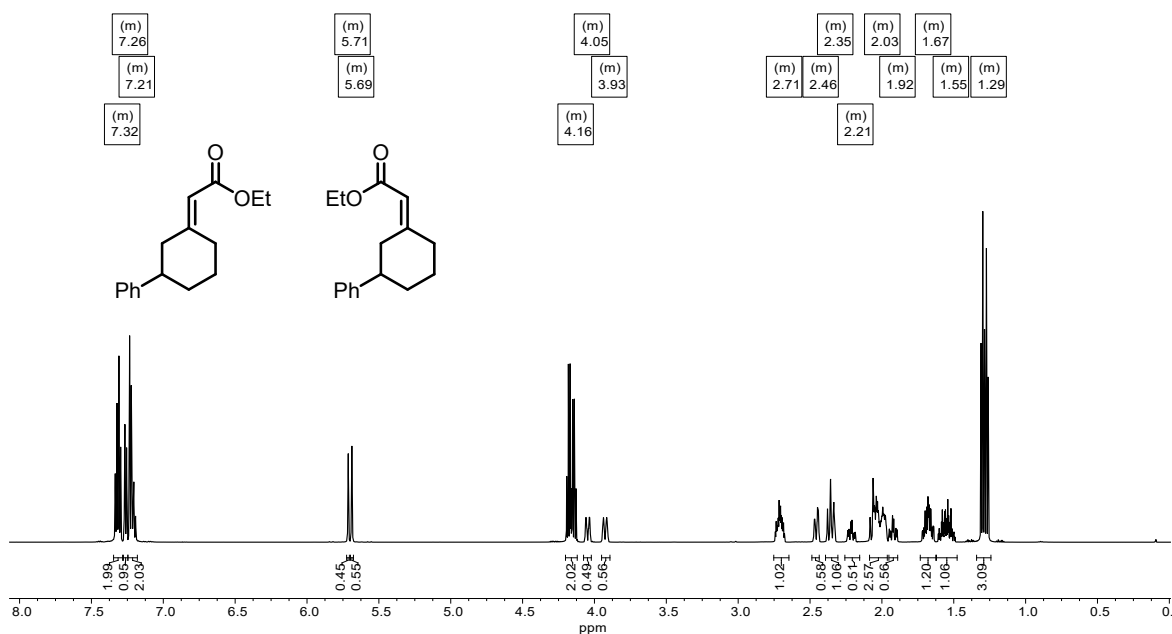

<sup>1</sup>H NMR spectrum of (E)-4 and (Z)-4 in CDCl<sub>3</sub>.

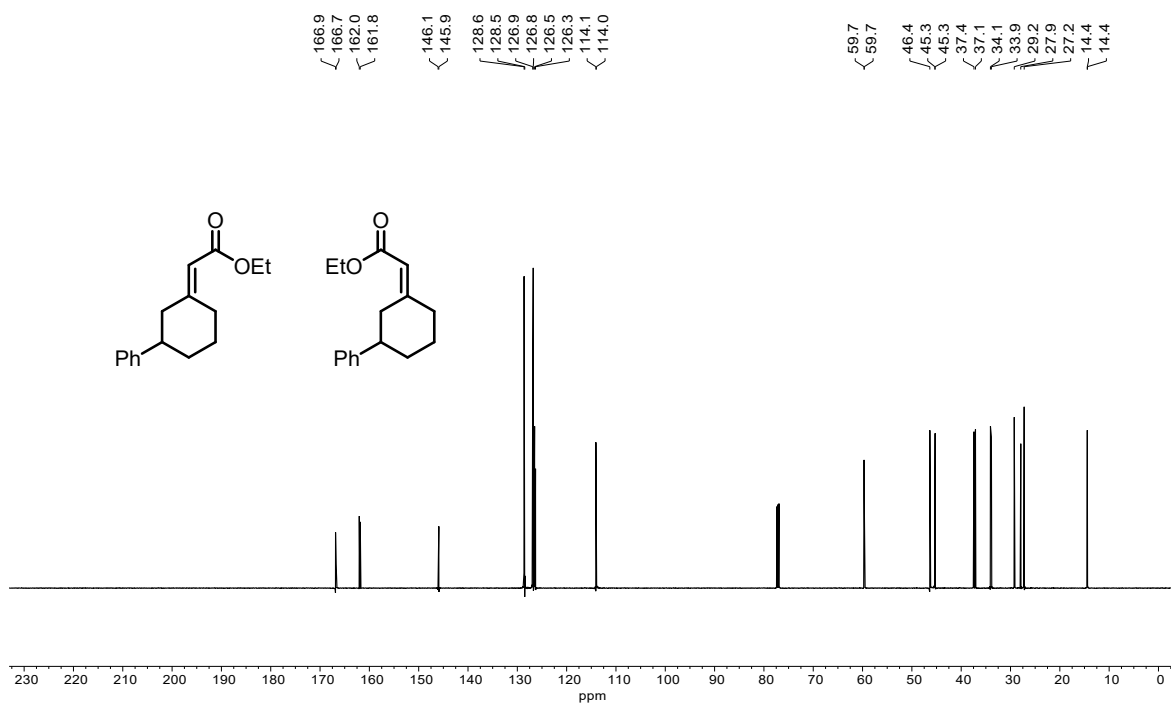

<sup>13</sup>C NMR spectrum of (E)-4 and (Z)-4 in CDCl<sub>3</sub>.

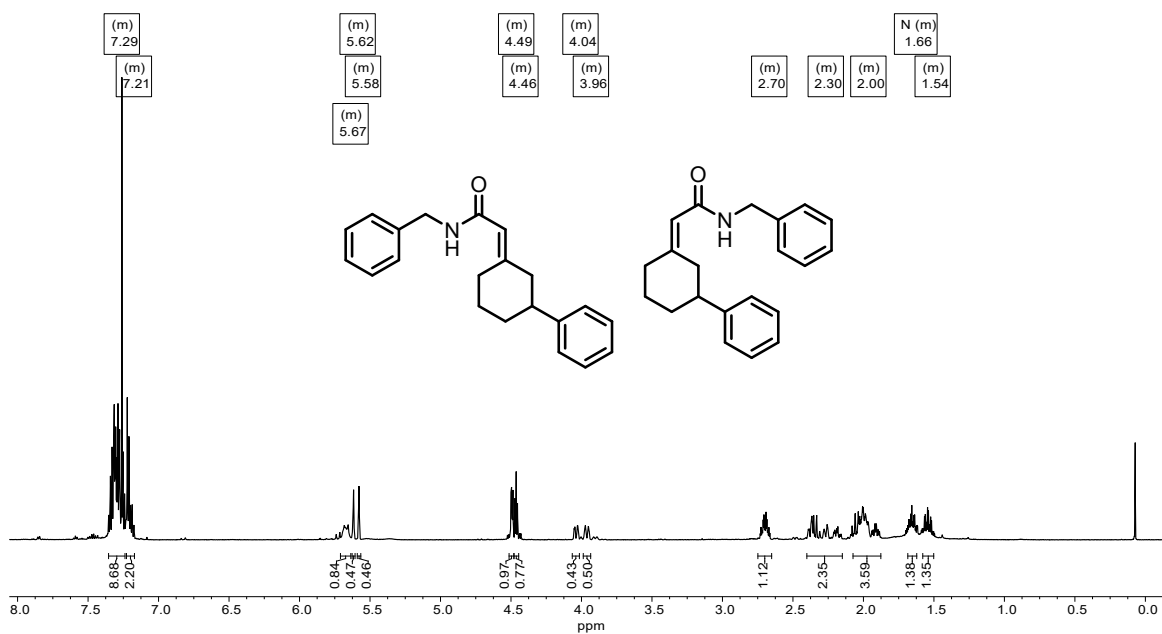

$^1\text{H}$  NMR spectrum of (*E*)-6 and (*Z*)-6 in  $\text{CDCl}_3$ .

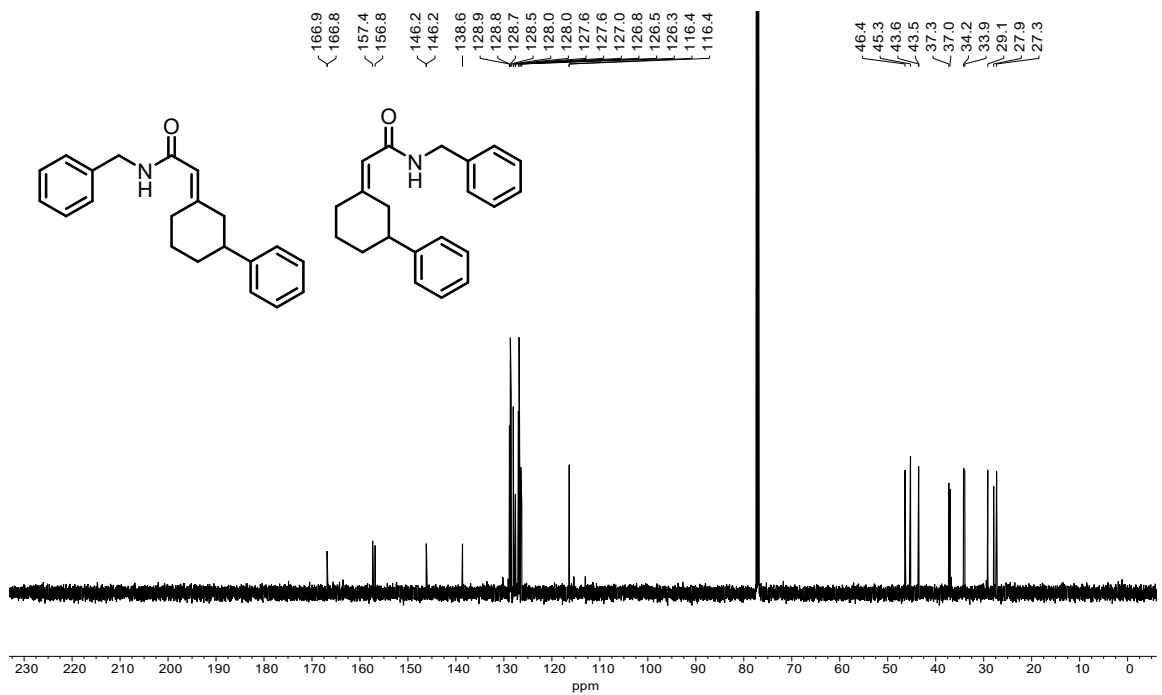

$^{13}\text{C}$  NMR spectrum of (*E*)-6 and (*Z*)-6 in  $\text{CDCl}_3$ .

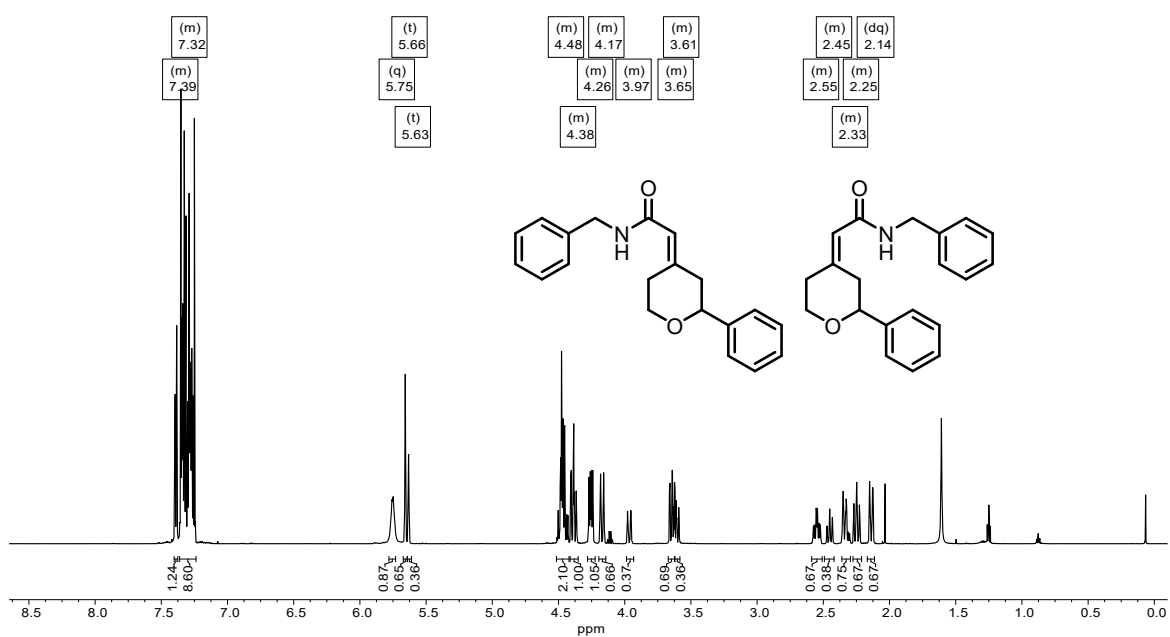

<sup>1</sup>H NMR spectrum of (E)-13 and (Z)-13 in CDCl<sub>3</sub>.

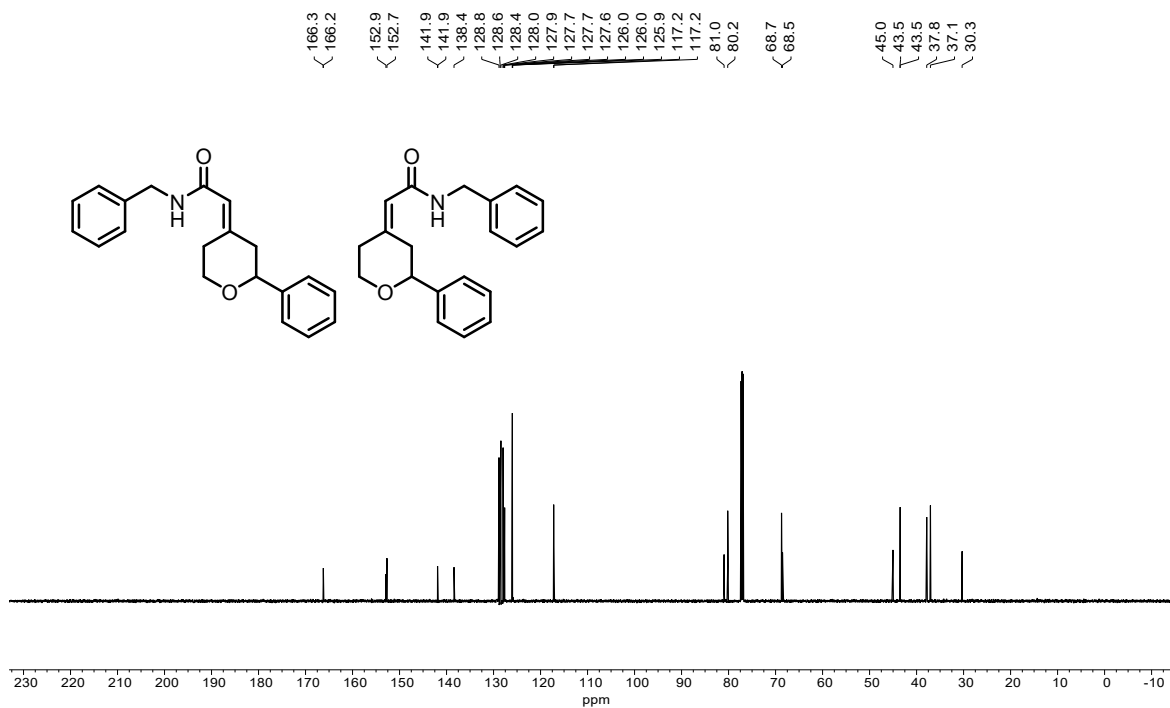

<sup>13</sup>C NMR spectrum of (E)-13 and (Z)-13 in CDCl<sub>3</sub>.

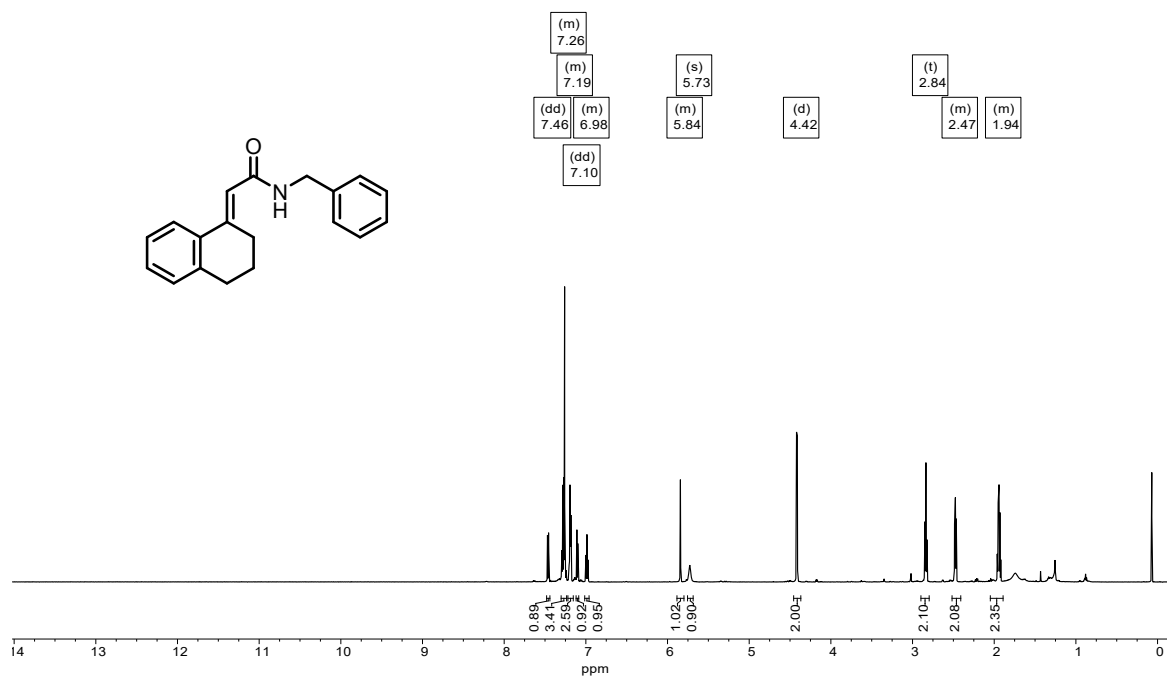

<sup>1</sup>H NMR spectrum of (E)-15 in CDCl<sub>3</sub>.

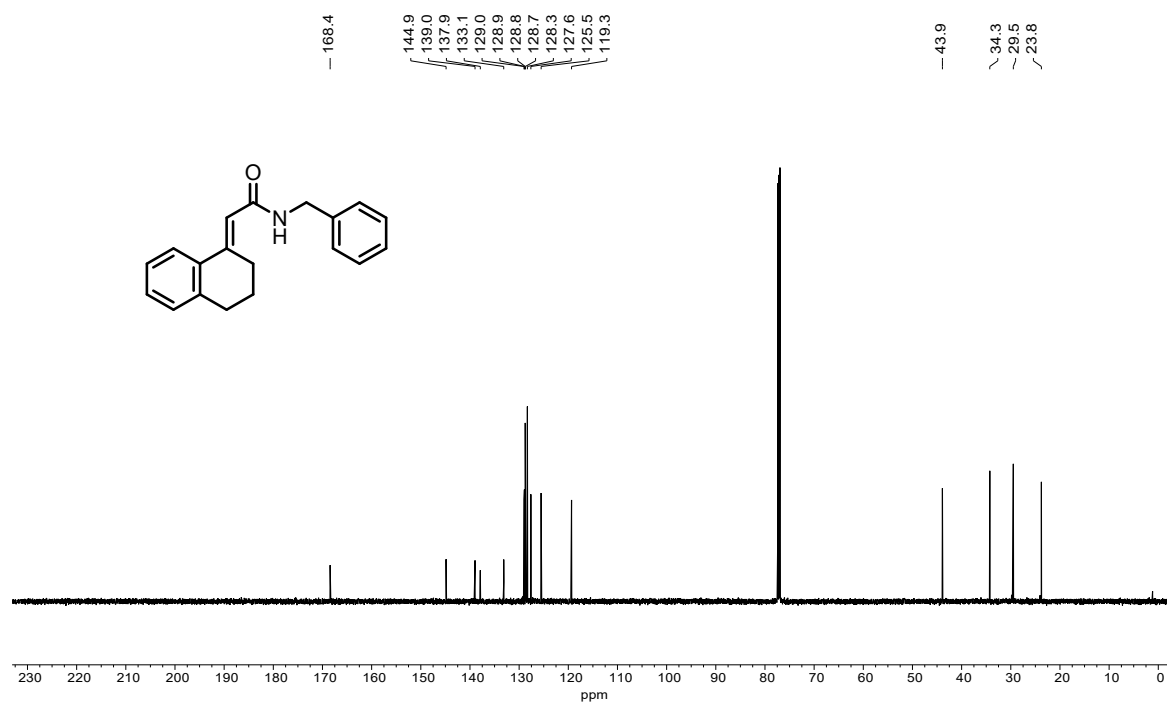

<sup>13</sup>C NMR spectrum of (E)-15 in CDCl<sub>3</sub>.



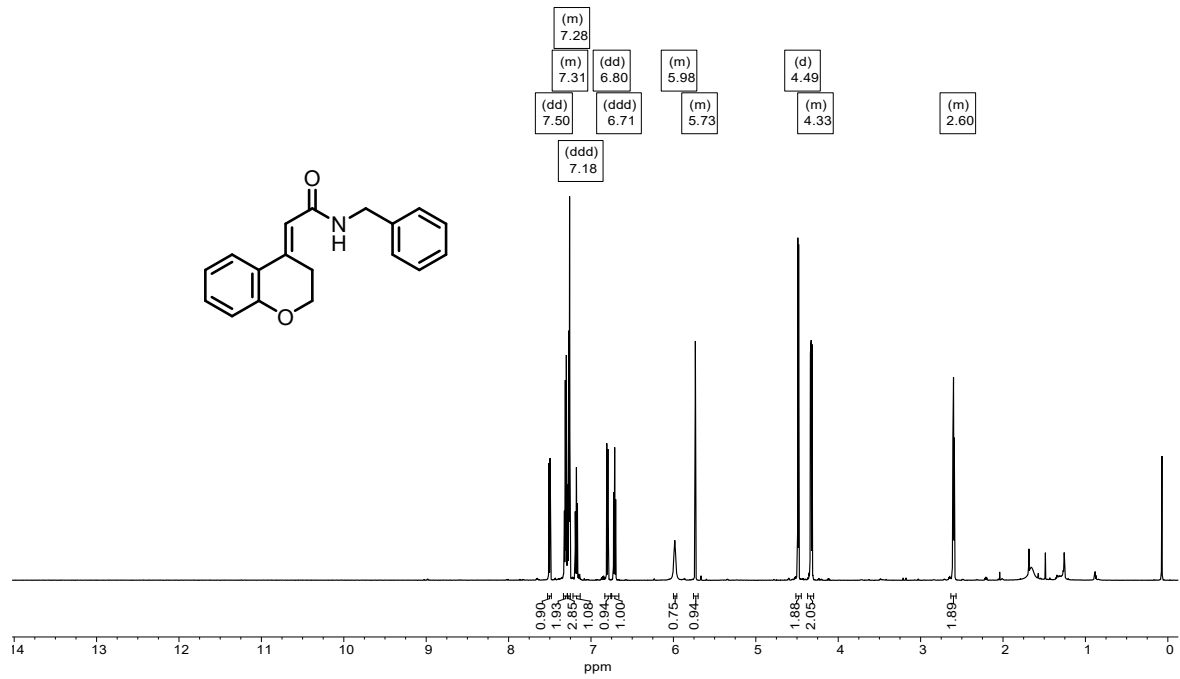

<sup>1</sup>H NMR spectrum of (E)-16 in CDCl<sub>3</sub>.

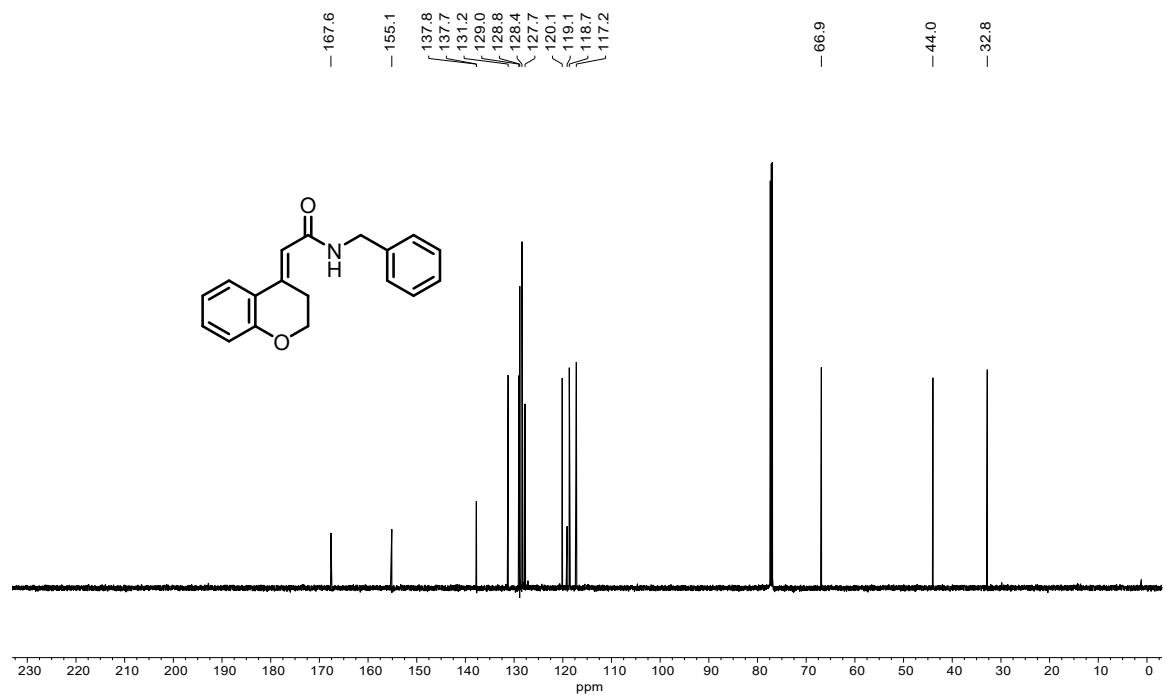

<sup>13</sup>C NMR spectrum of (E)-16 in CDCl<sub>3</sub>.

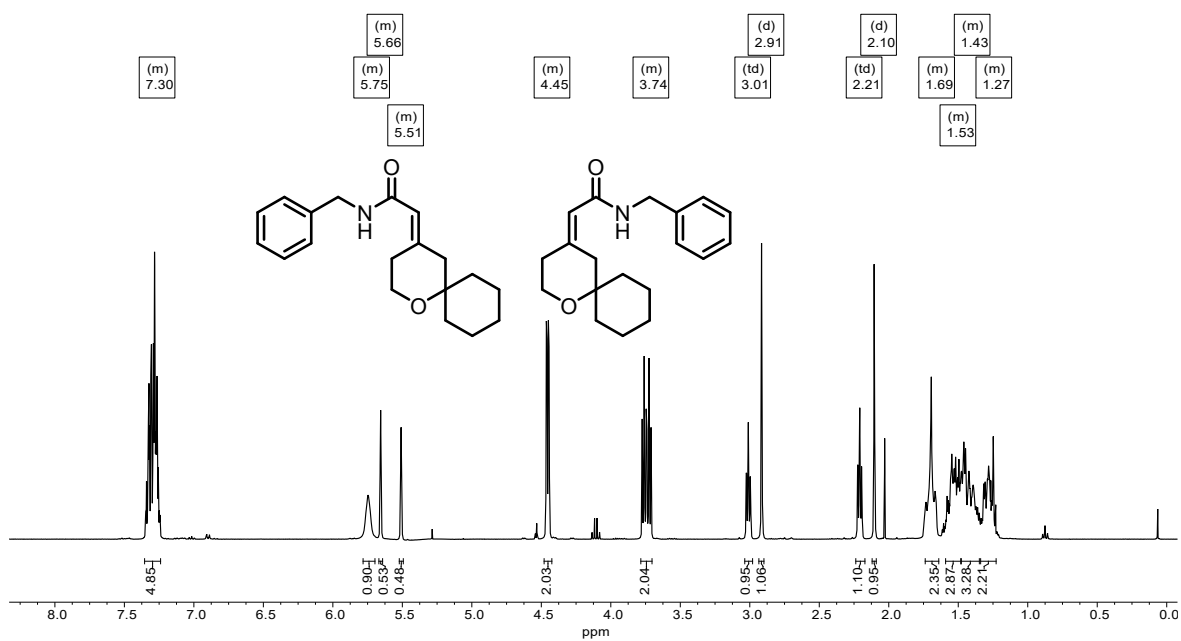

$^1\text{H}$  NMR spectrum of (*E*)-14 and (*Z*)-14 in  $\text{CDCl}_3$ .

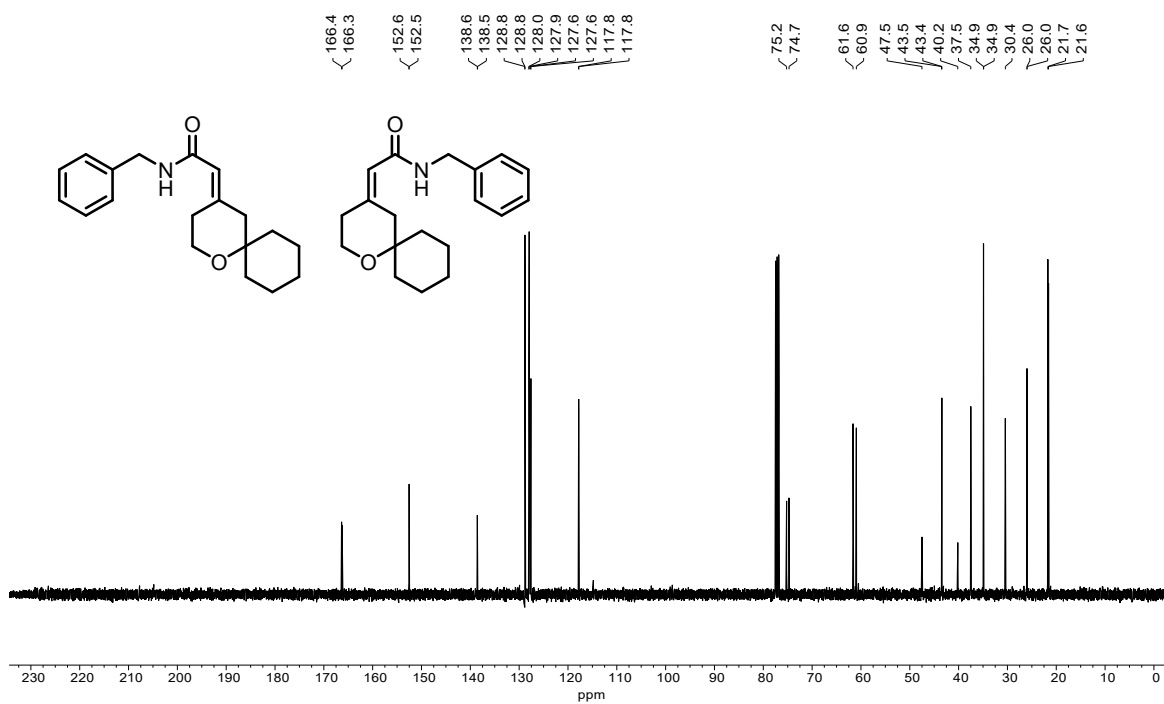

$^{13}\text{C}$  NMR spectrum of (*E*)-14 and (*Z*)-14 in  $\text{CDCl}_3$ .

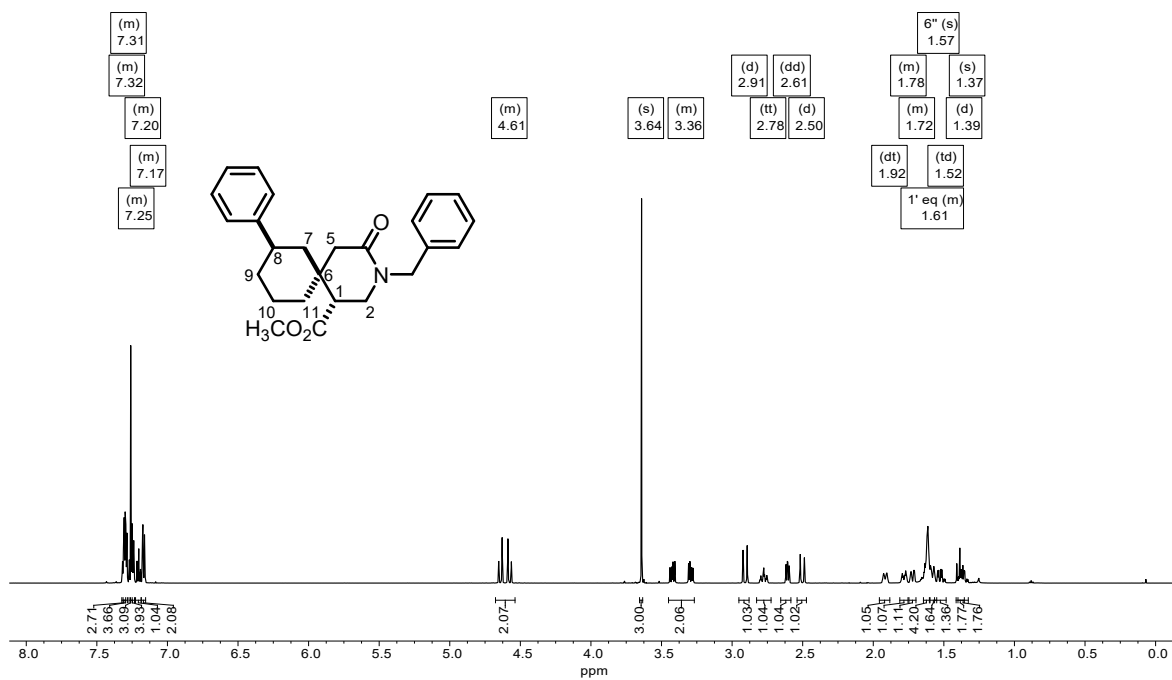

**1H NMR spectrum of 8a in CDCl<sub>3</sub>.**

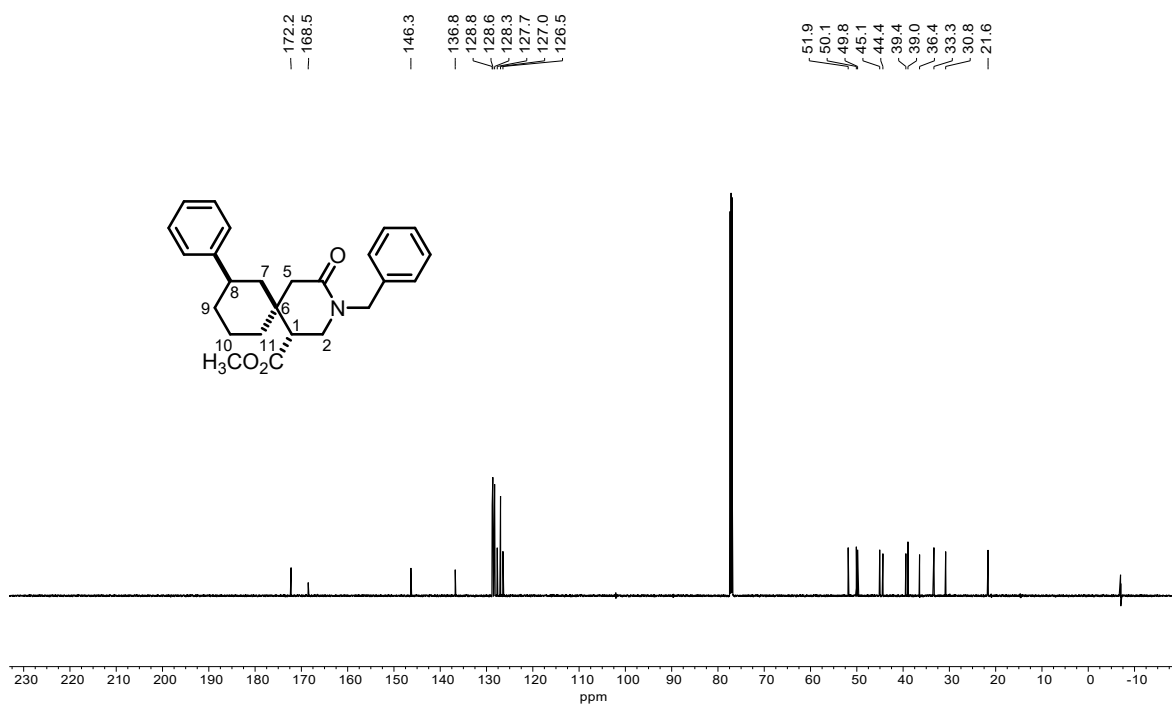

**13C NMR spectrum of 8a in CDCl<sub>3</sub>.**

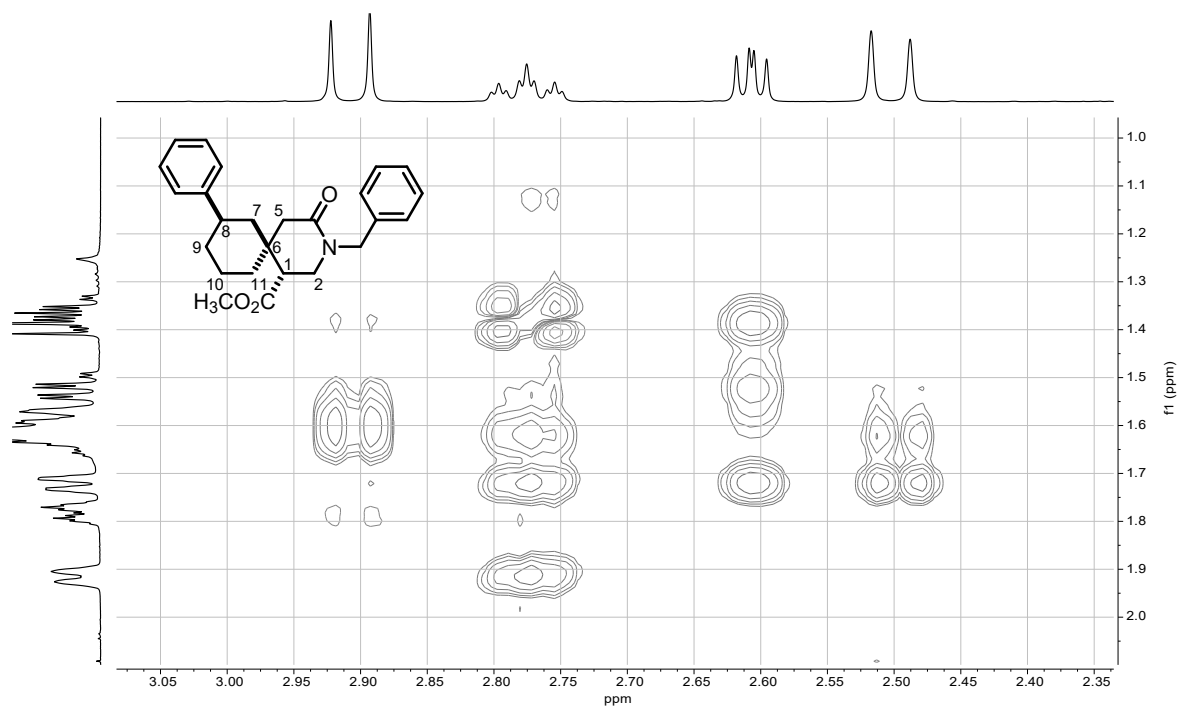

NOESY spectrum of **8a** in  $\text{CDCl}_3$ .

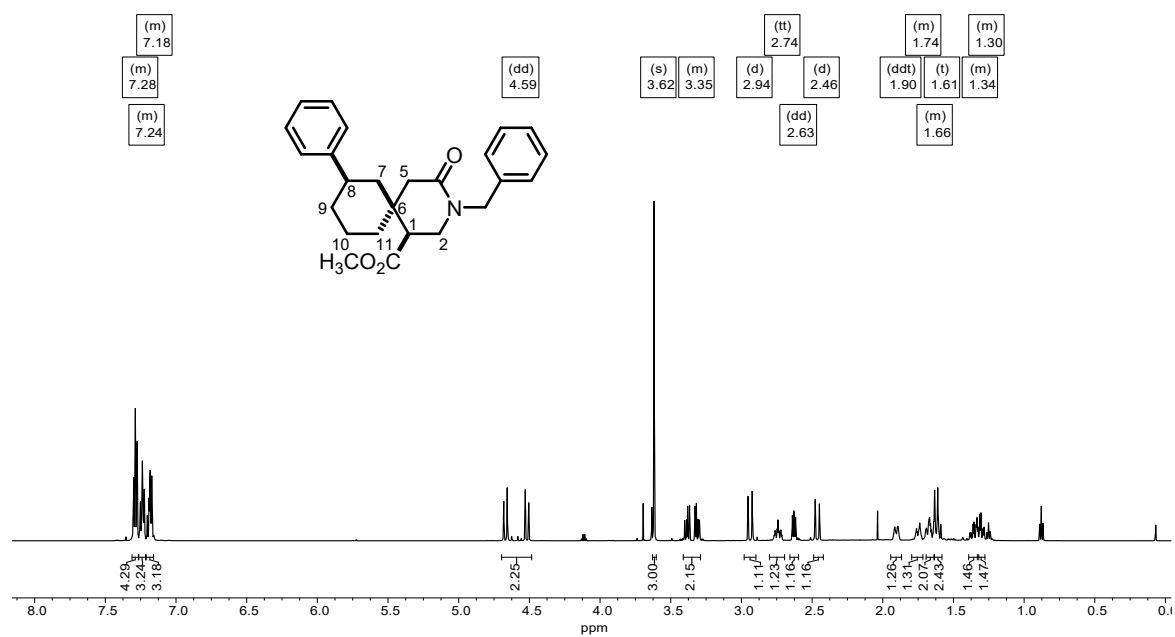

$^1\text{H}$  NMR spectrum of **8b** in  $\text{CDCl}_3$ .

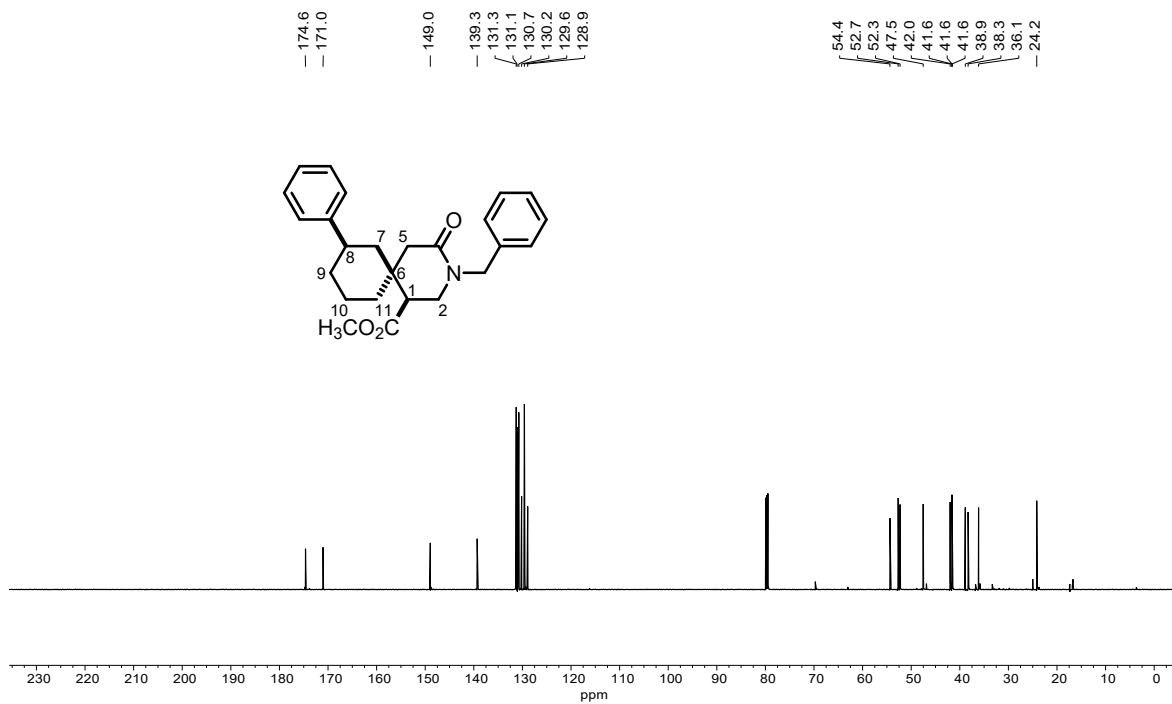

$^{13}\text{C}$  NMR spectrum of **8b** in  $\text{CDCl}_3$ .

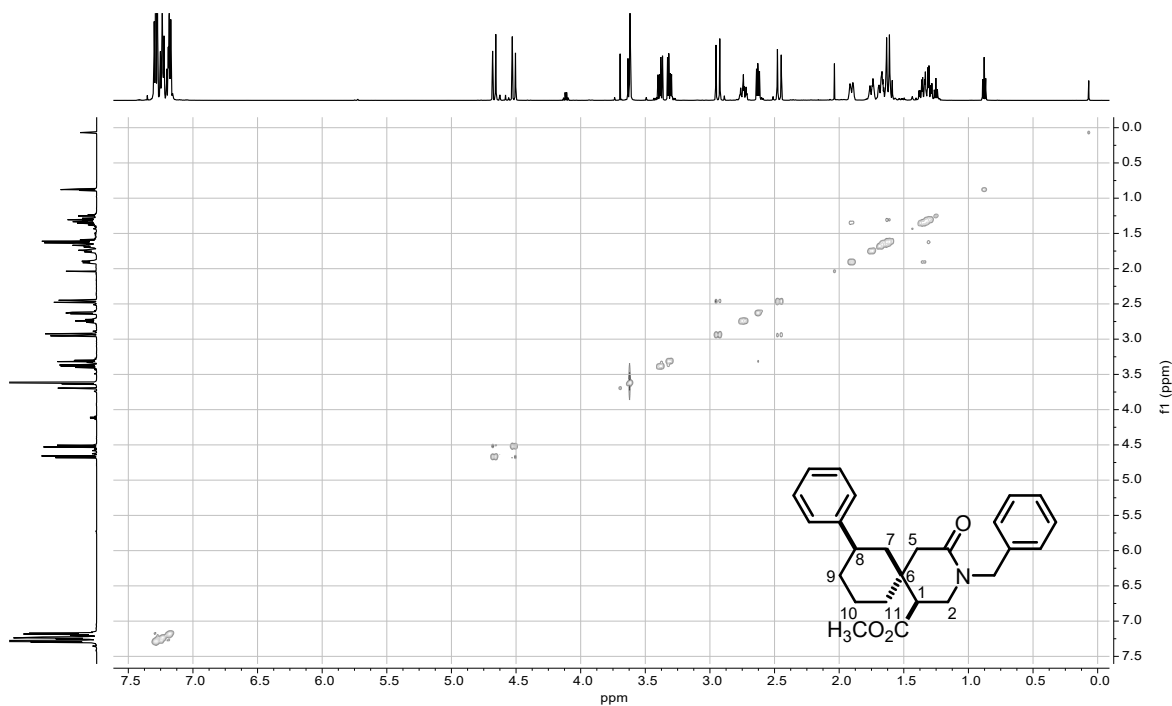

NOESY spectrum of **8b** in  $\text{CDCl}_3$ .

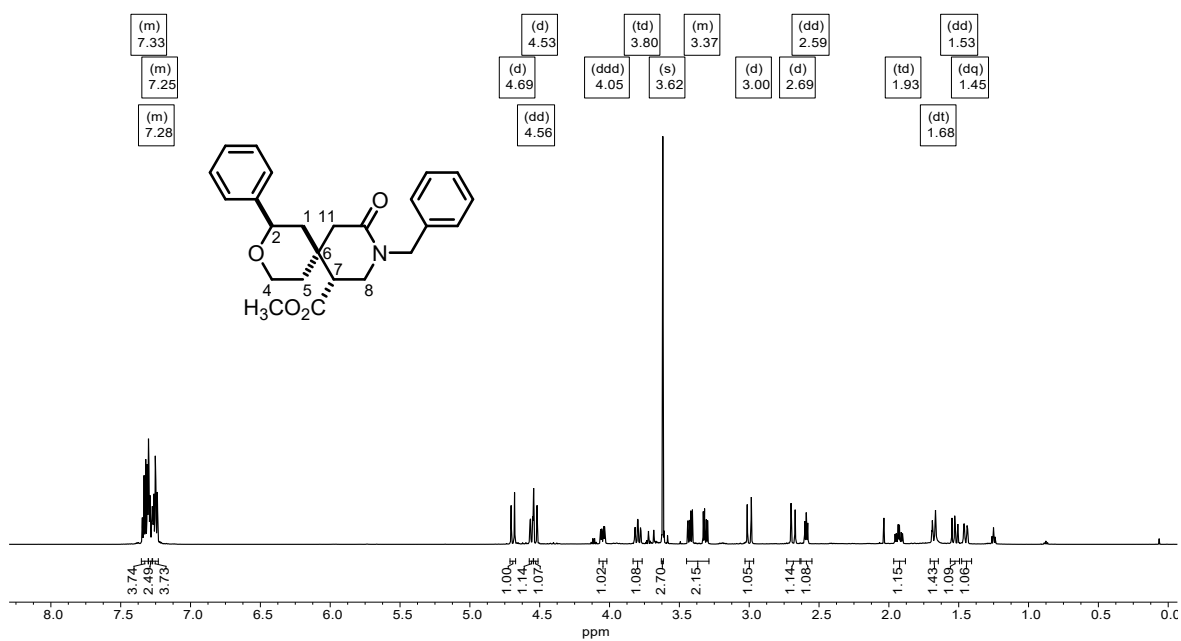

<sup>1</sup>H NMR spectrum of 17a in CDCl<sub>3</sub>.

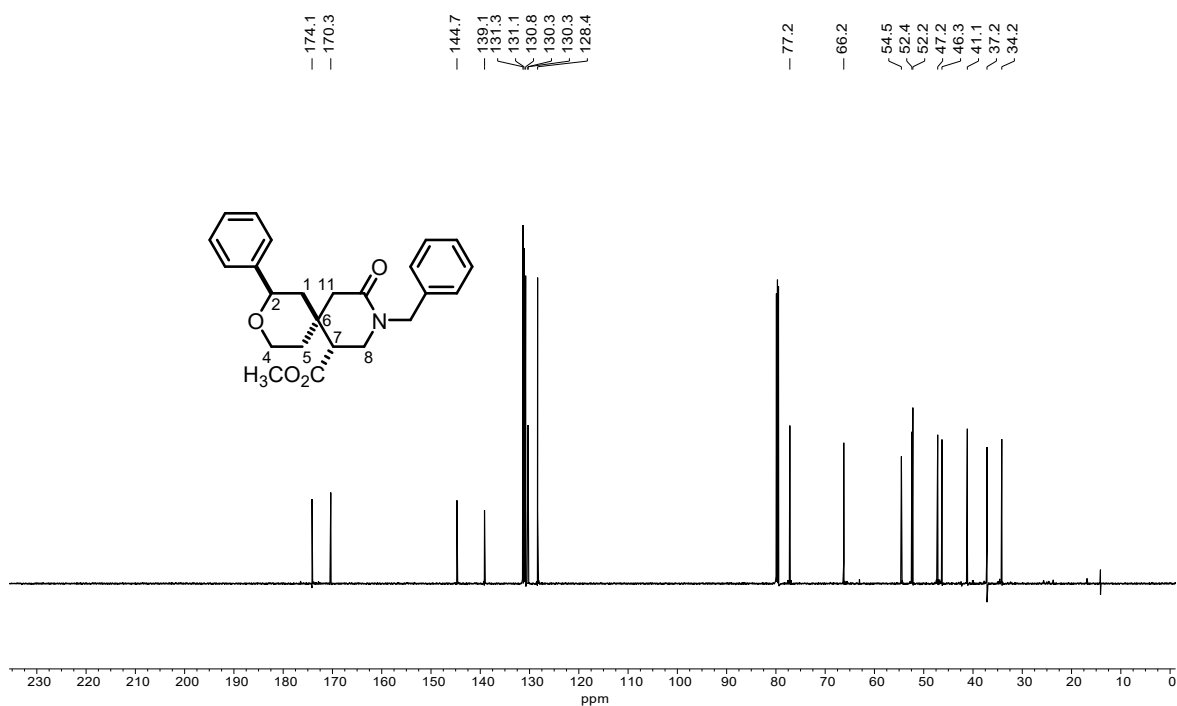

<sup>13</sup>C NMR spectrum of 17a in CDCl<sub>3</sub>.

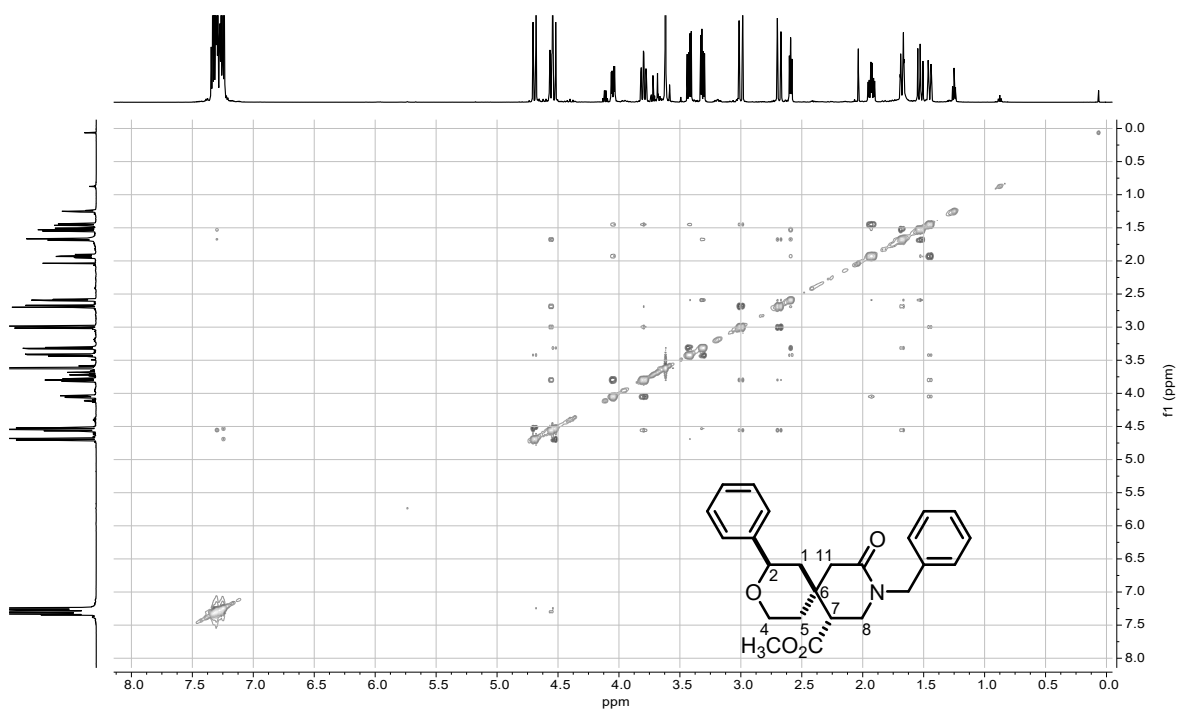

NOESY spectrum of **17a** in  $\text{CDCl}_3$ .

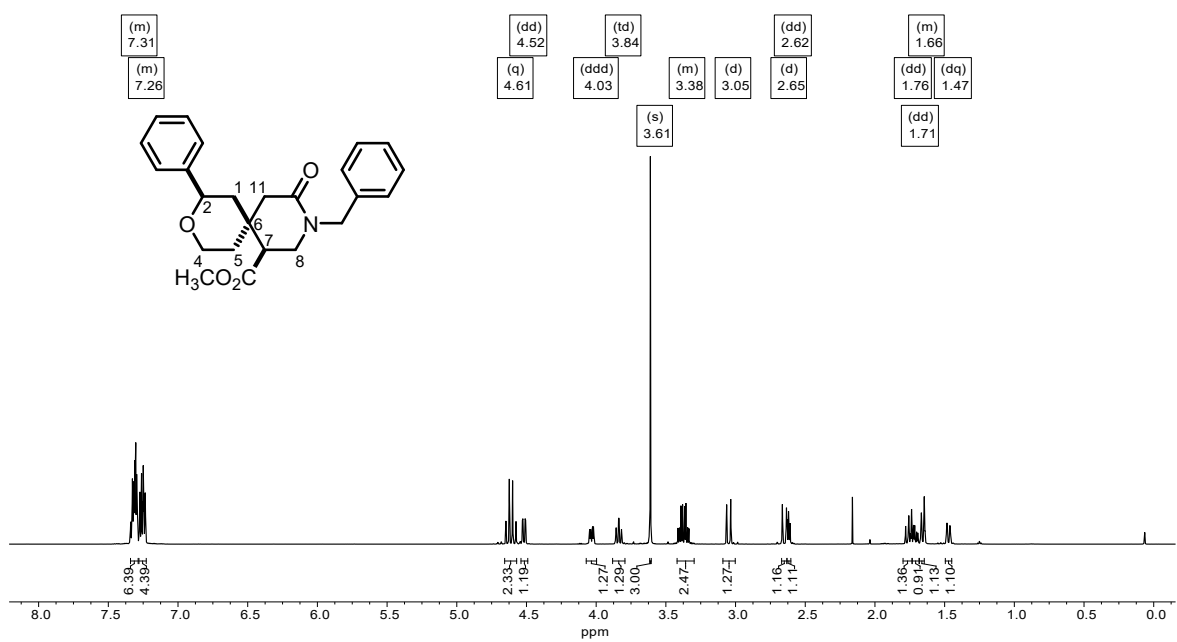

$^1\text{H}$  NMR spectrum of **17b** in  $\text{CDCl}_3$ .

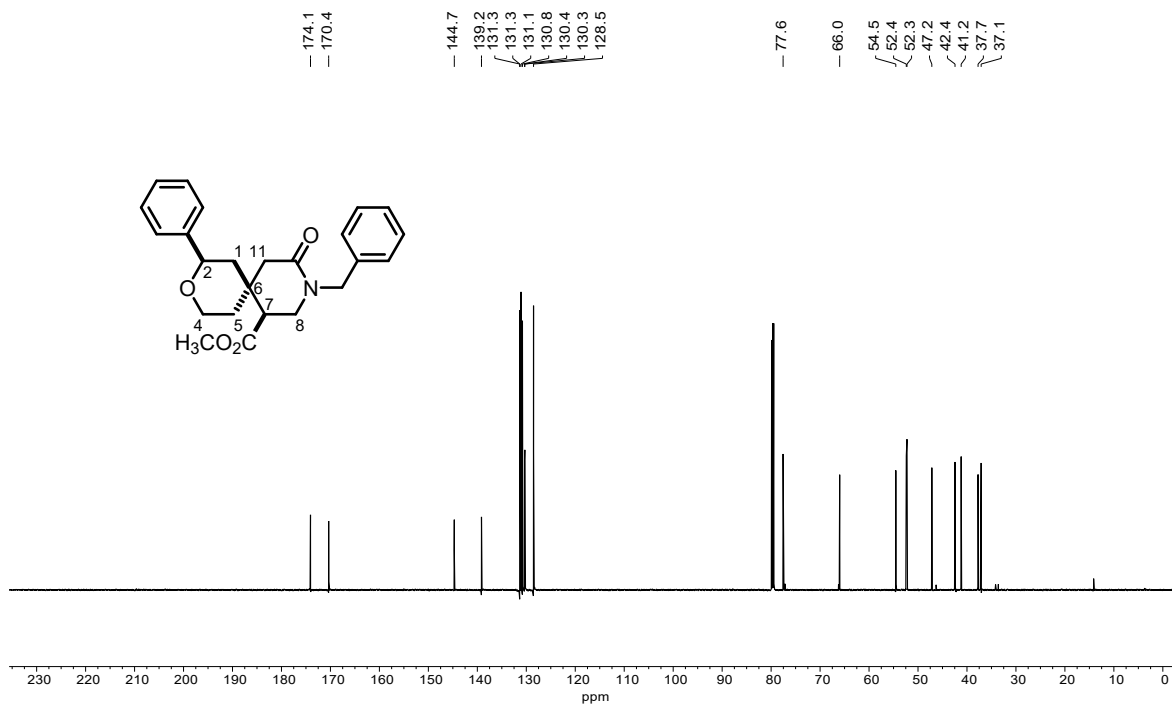

<sup>13</sup>C NMR spectrum of **17b** in CDCl<sub>3</sub>.

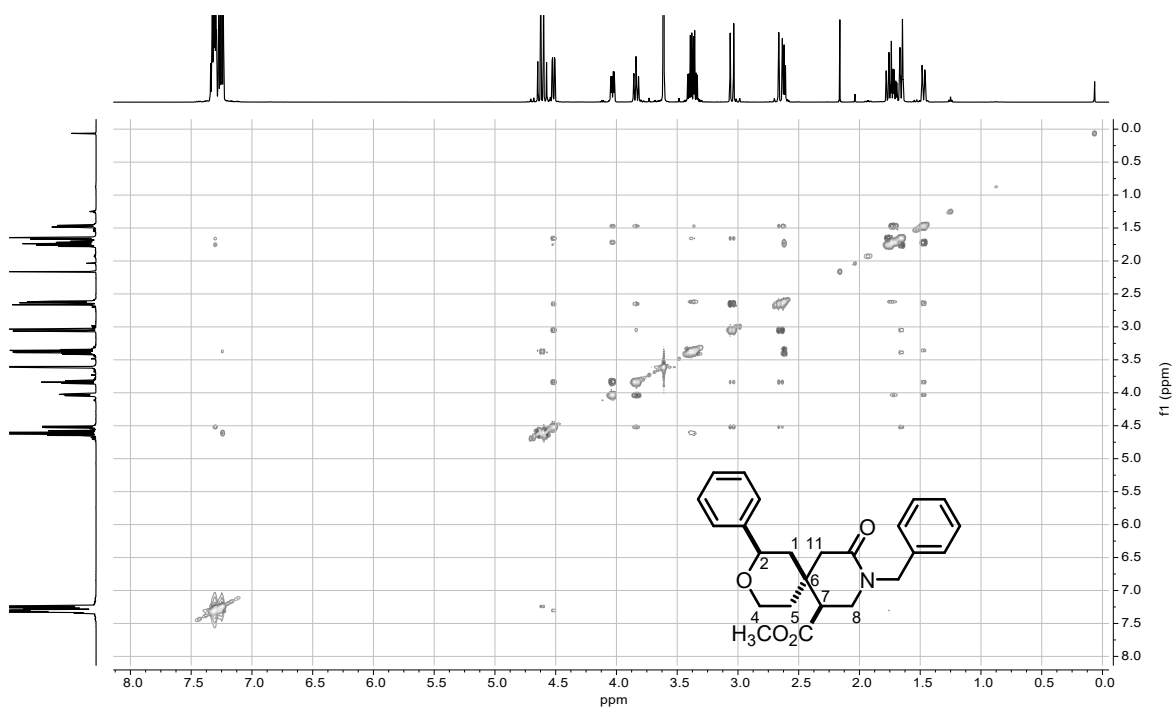

NOESY spectrum of **17b** in CDCl<sub>3</sub>.



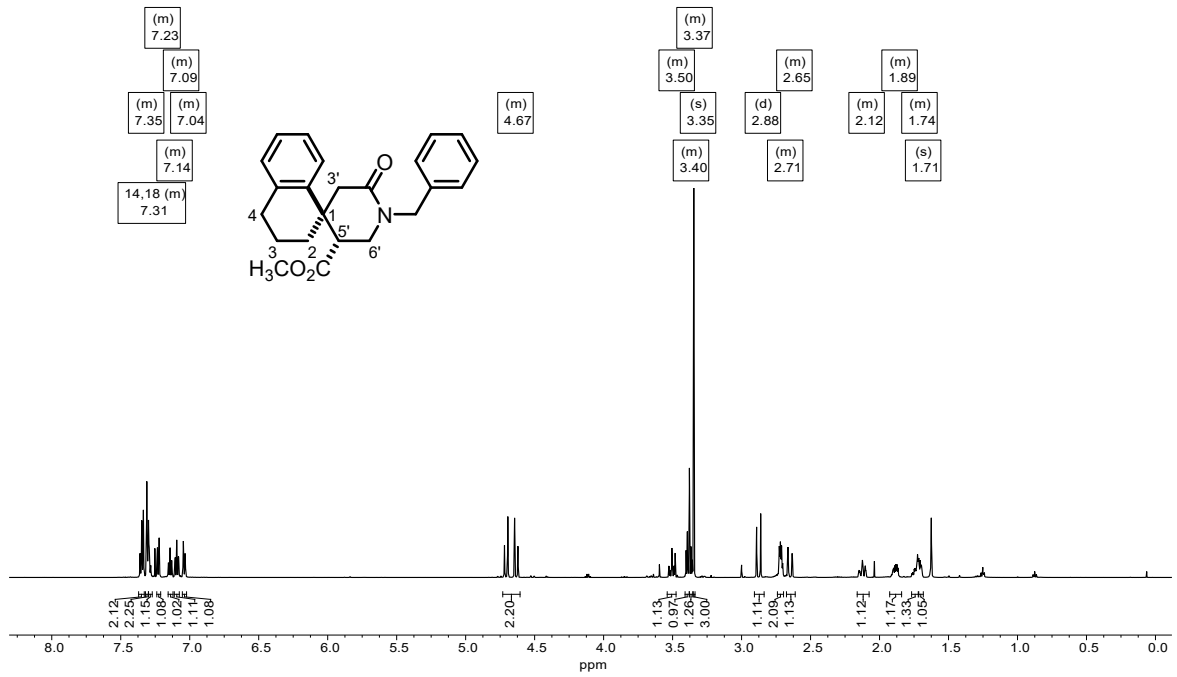

**<sup>1</sup>H NMR spectrum of **19a** in CDCl<sub>3</sub>.**

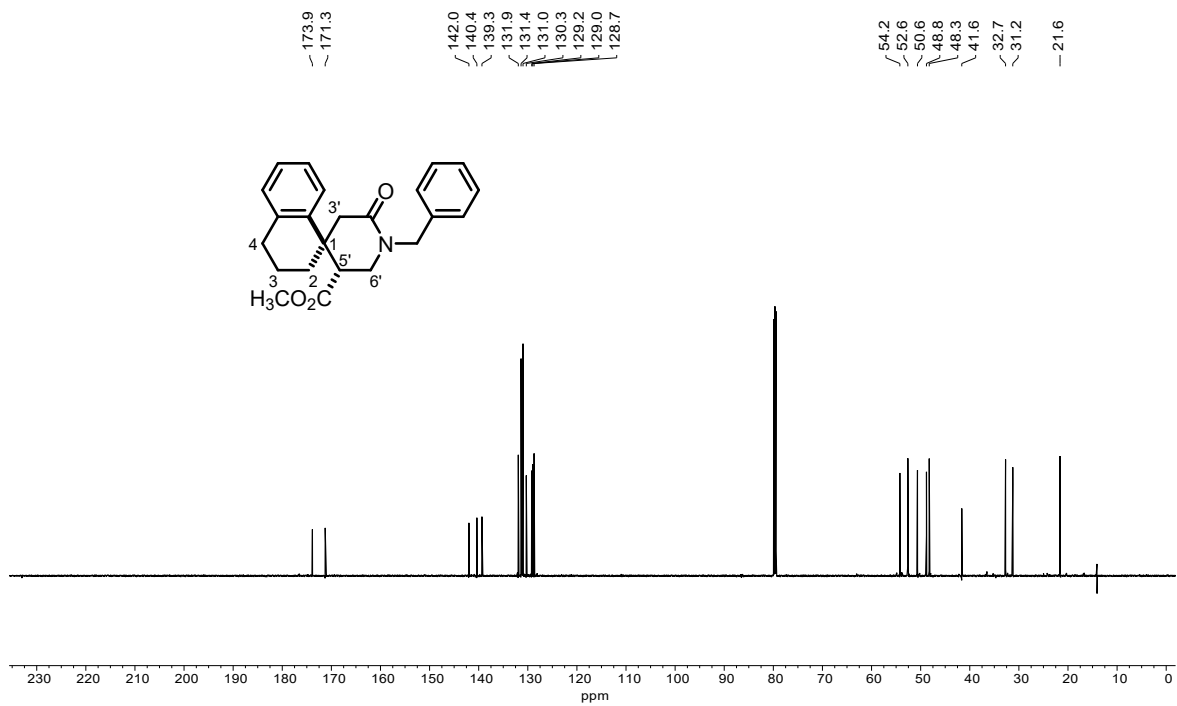

**<sup>13</sup>C NMR spectrum of **19a** in CDCl<sub>3</sub>.**

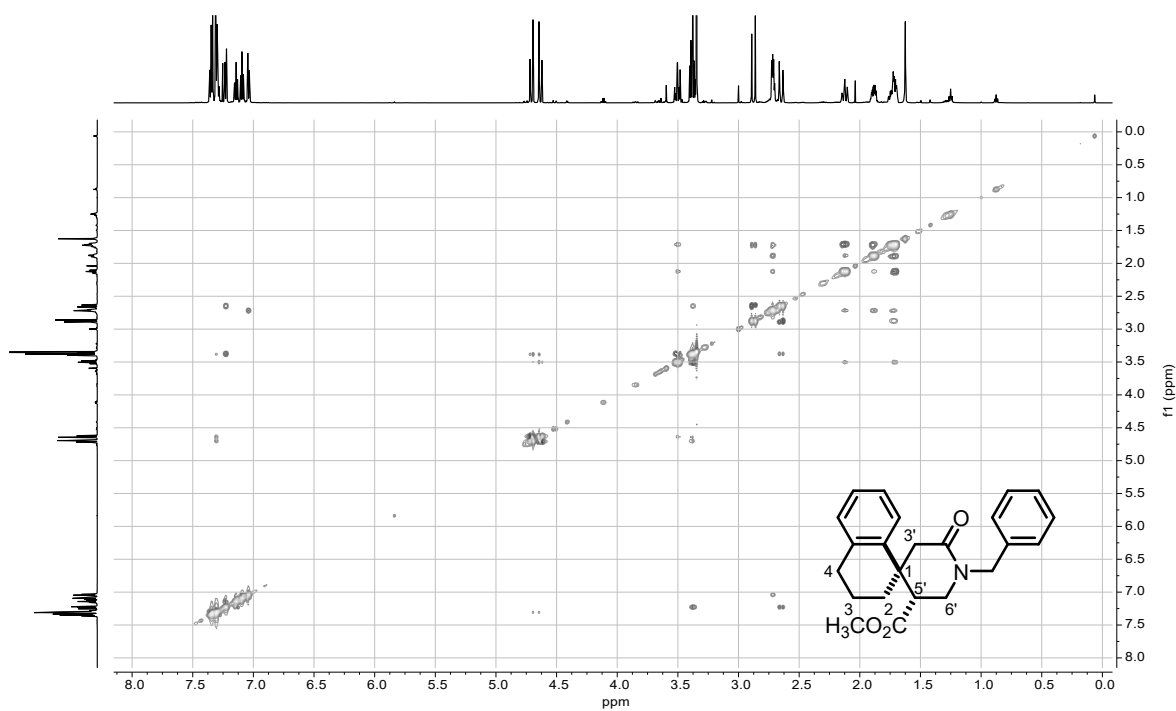

NOESY spectrum of **19a** in  $\text{CDCl}_3$ .

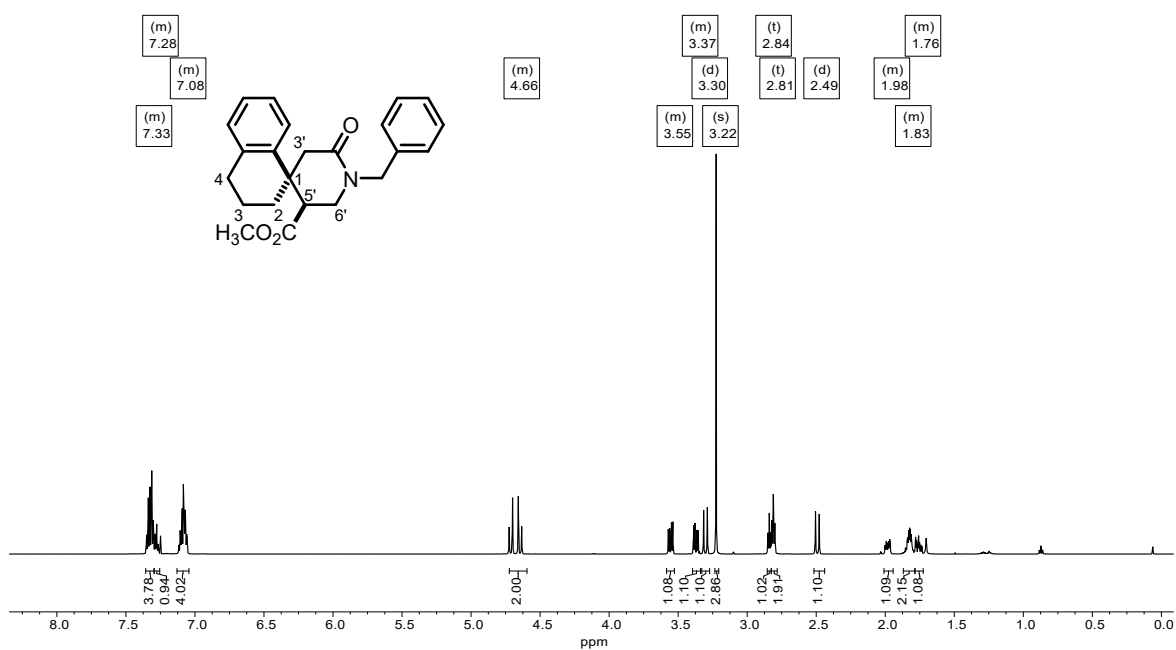

$^1\text{H}$  NMR spectrum of **19b** in  $\text{CDCl}_3$ .

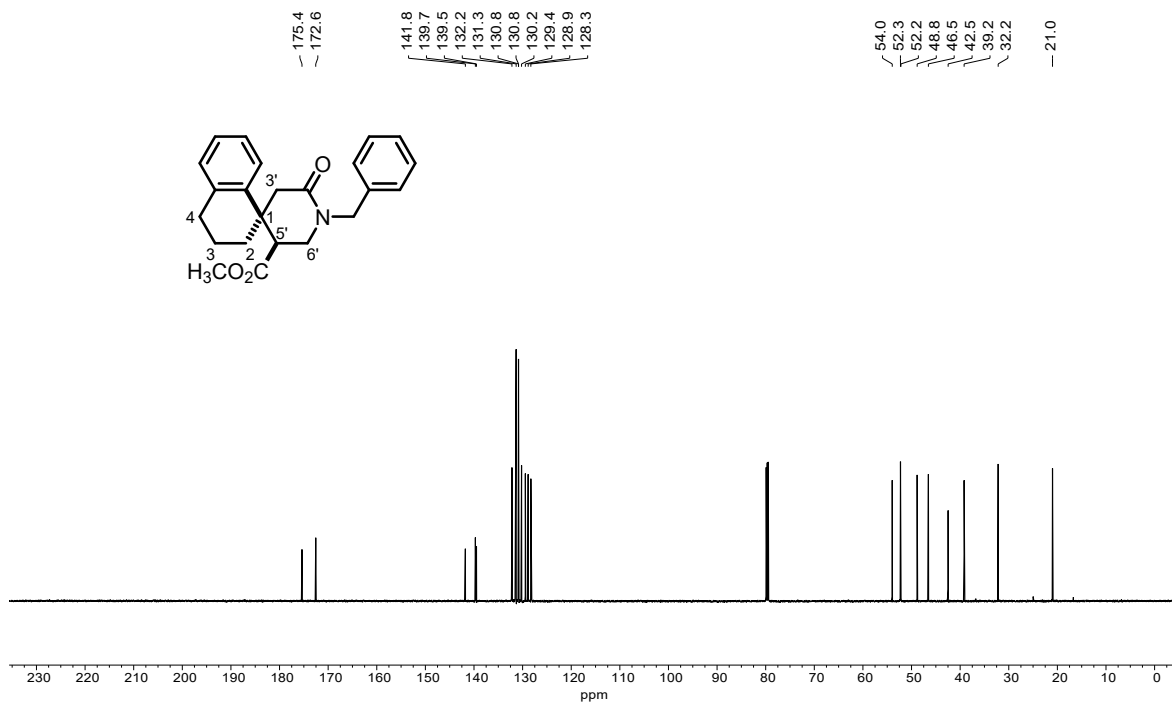

<sup>13</sup>C NMR spectrum of **19b** in CDCl<sub>3</sub>.

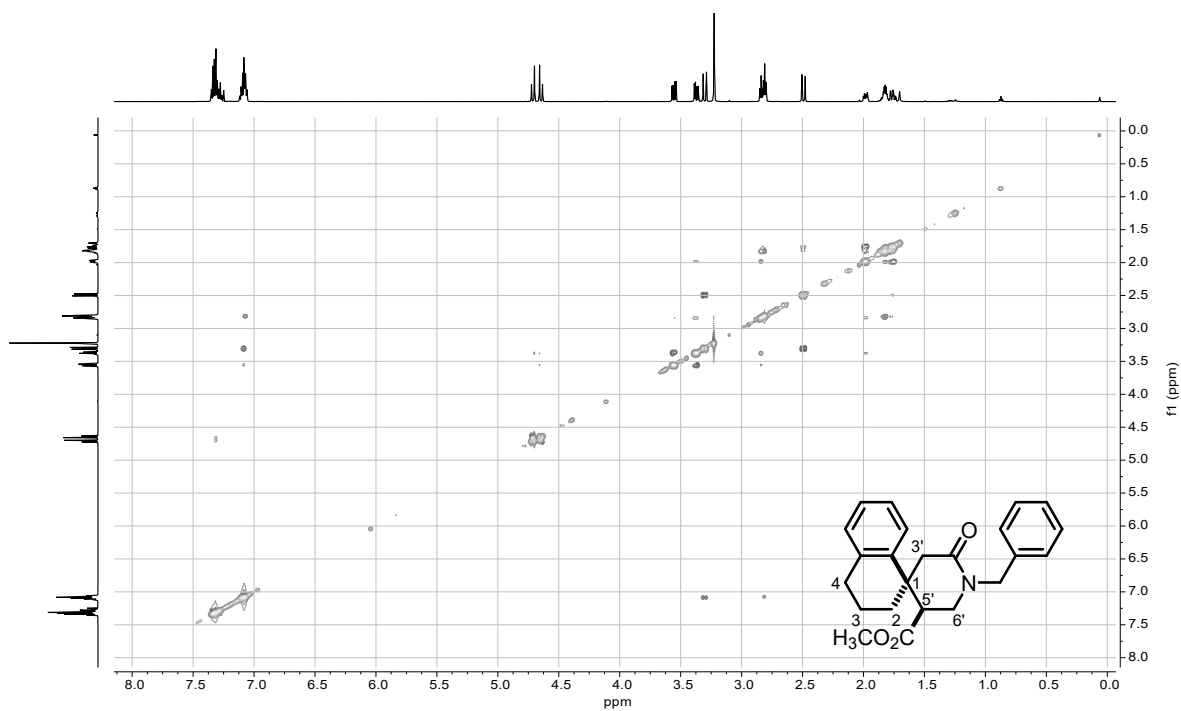

NOESY spectrum of **19b** in CDCl<sub>3</sub>.

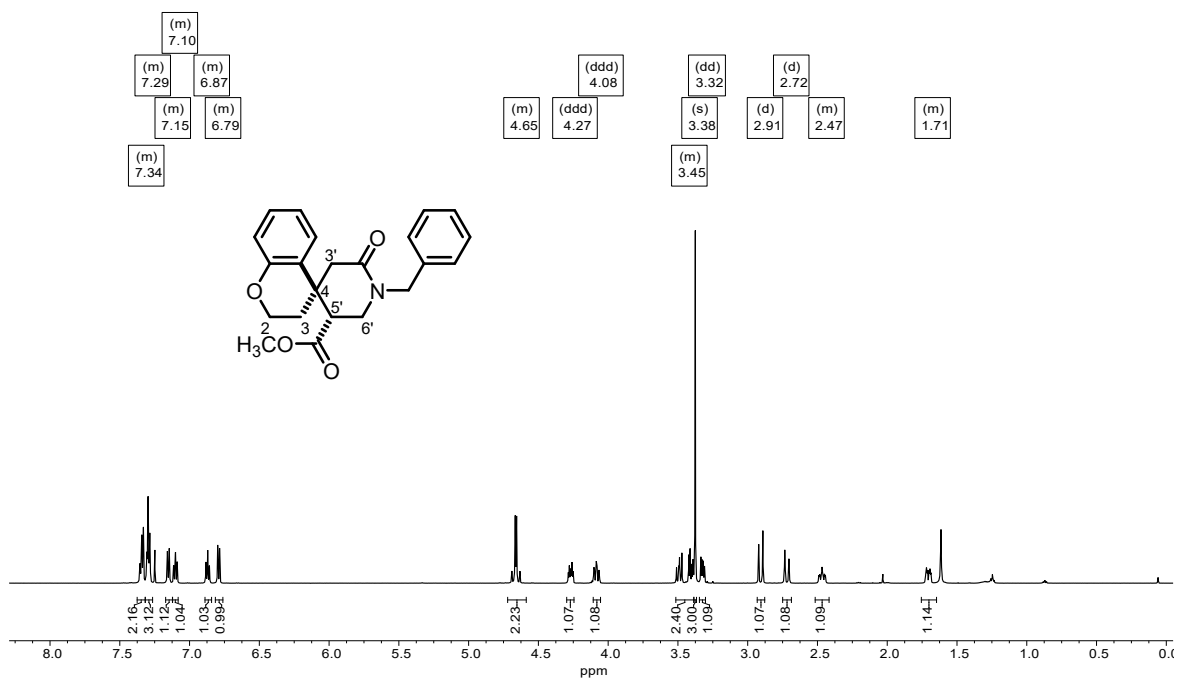

**<sup>1</sup>H NMR spectrum of 20a in CDCl<sub>3</sub>.**

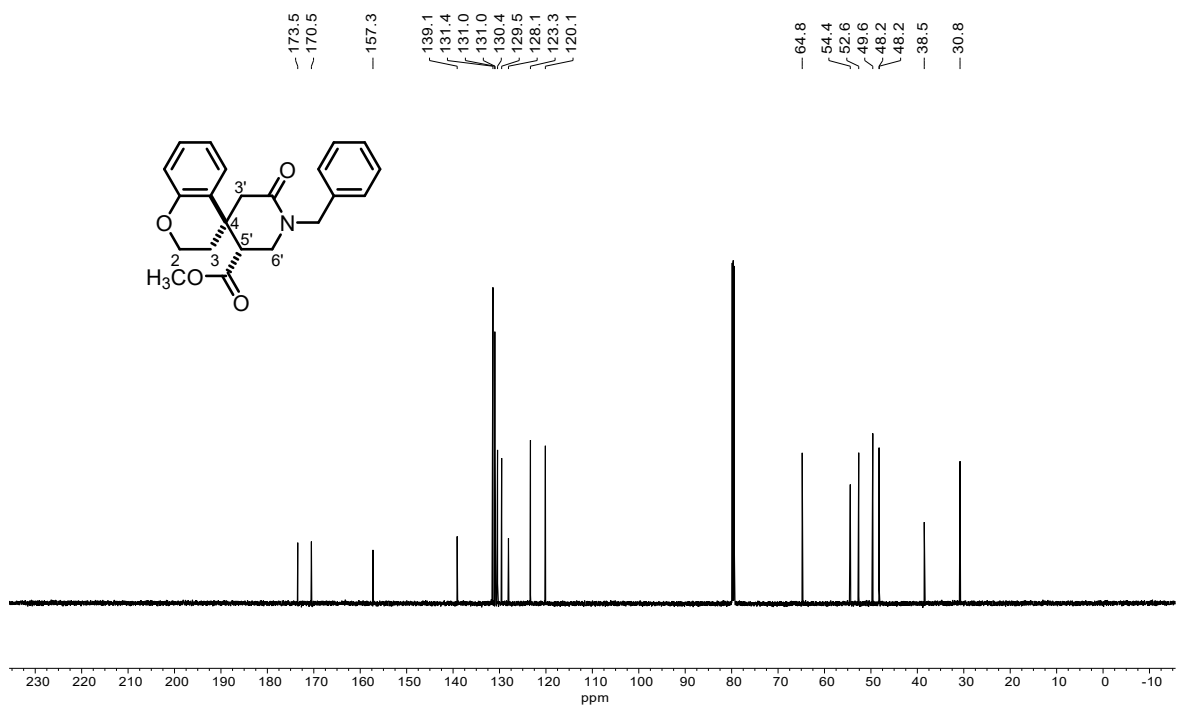

**<sup>13</sup>C NMR spectrum of 20a in CDCl<sub>3</sub>.**

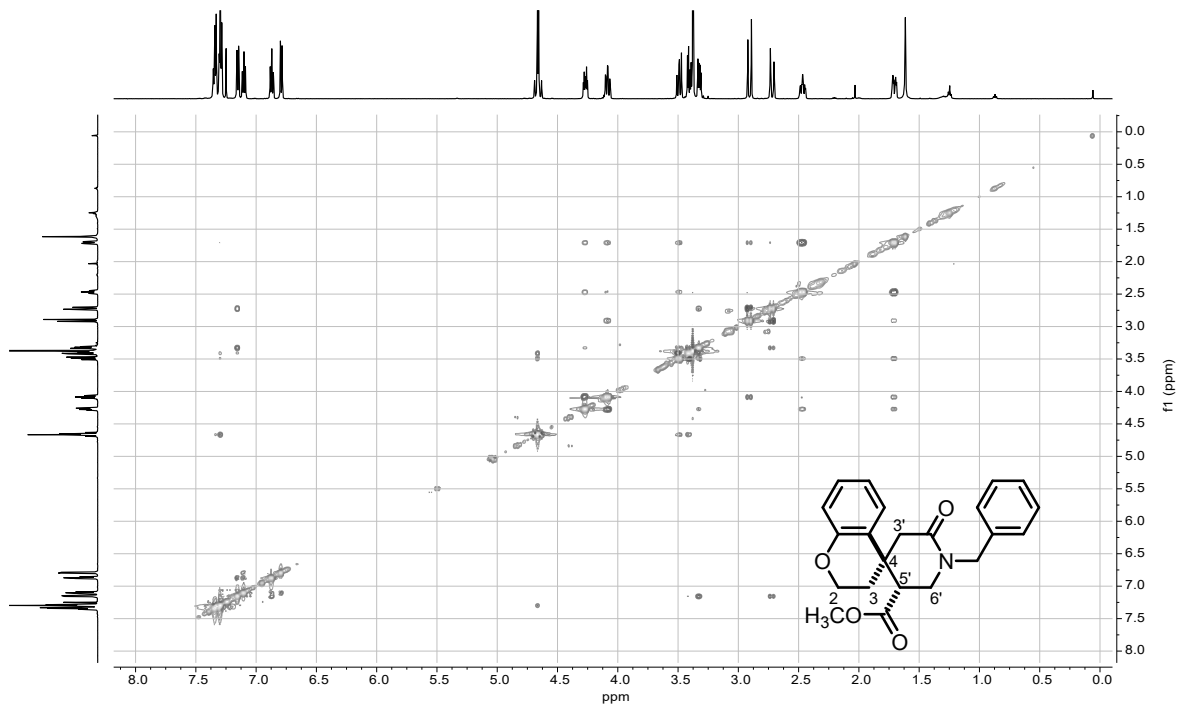

NOESY spectrum of **20a** in  $\text{CDCl}_3$ .

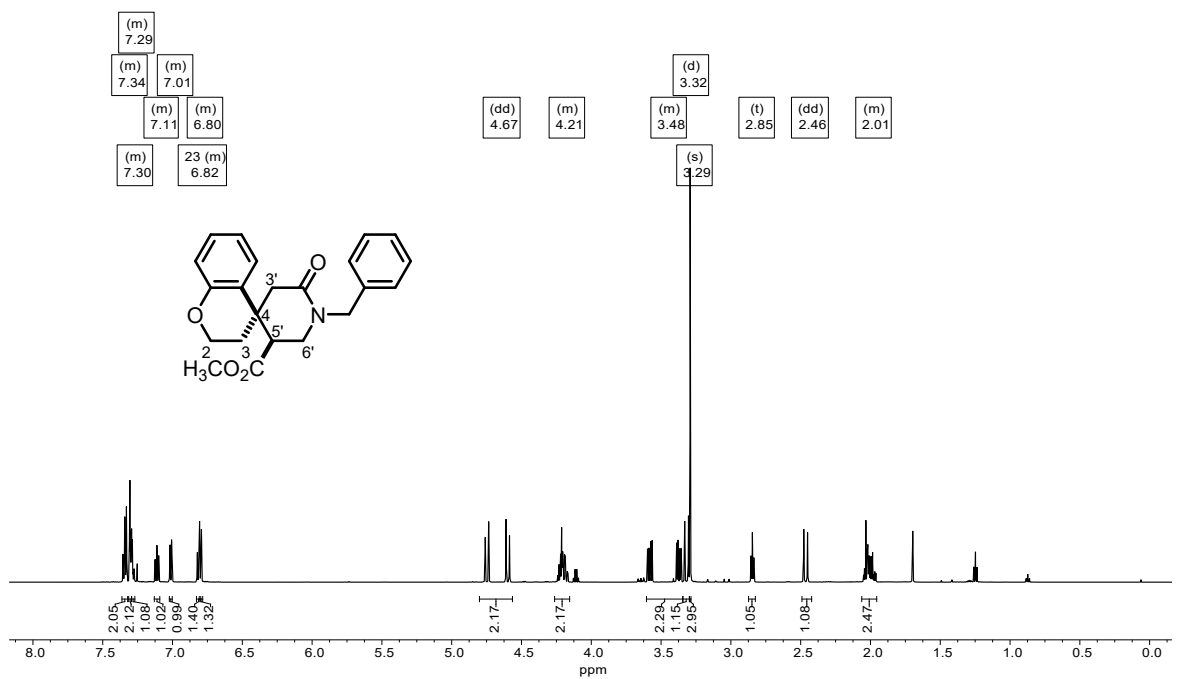

$^1\text{H}$  NMR spectrum of **20b** in  $\text{CDCl}_3$ .

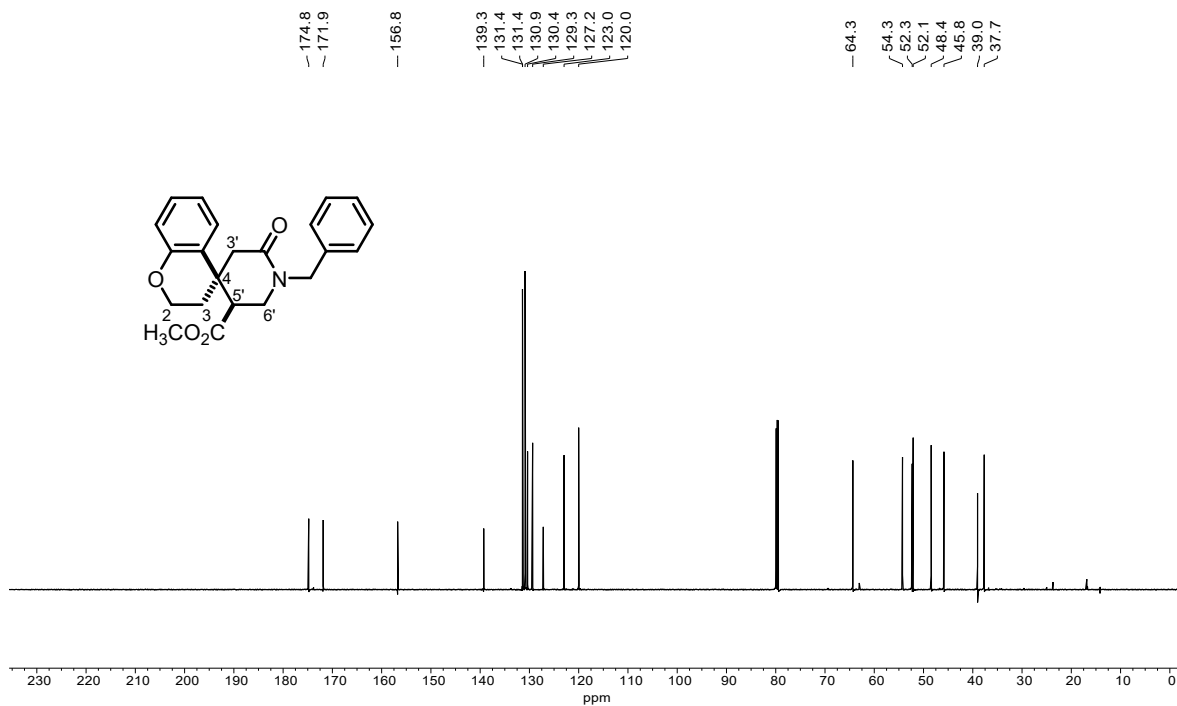

<sup>13</sup>C NMR spectrum of **20b** in CDCl<sub>3</sub>.

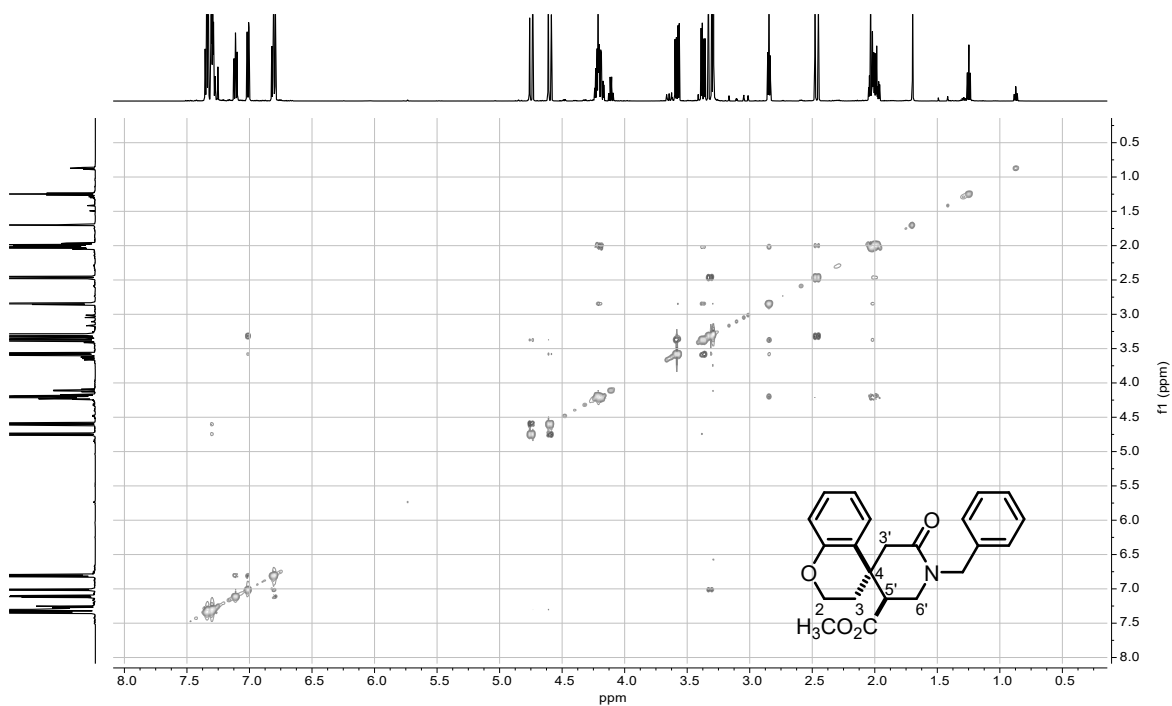

NOESY spectrum of **20b** in CDCl<sub>3</sub>.

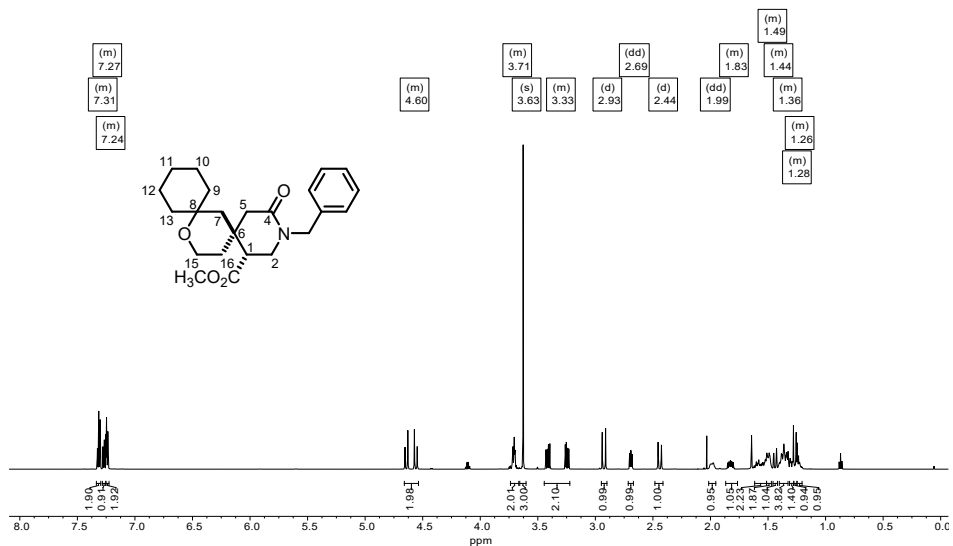

**<sup>1</sup>H NMR spectrum of 18a in CDCl<sub>3</sub>.**

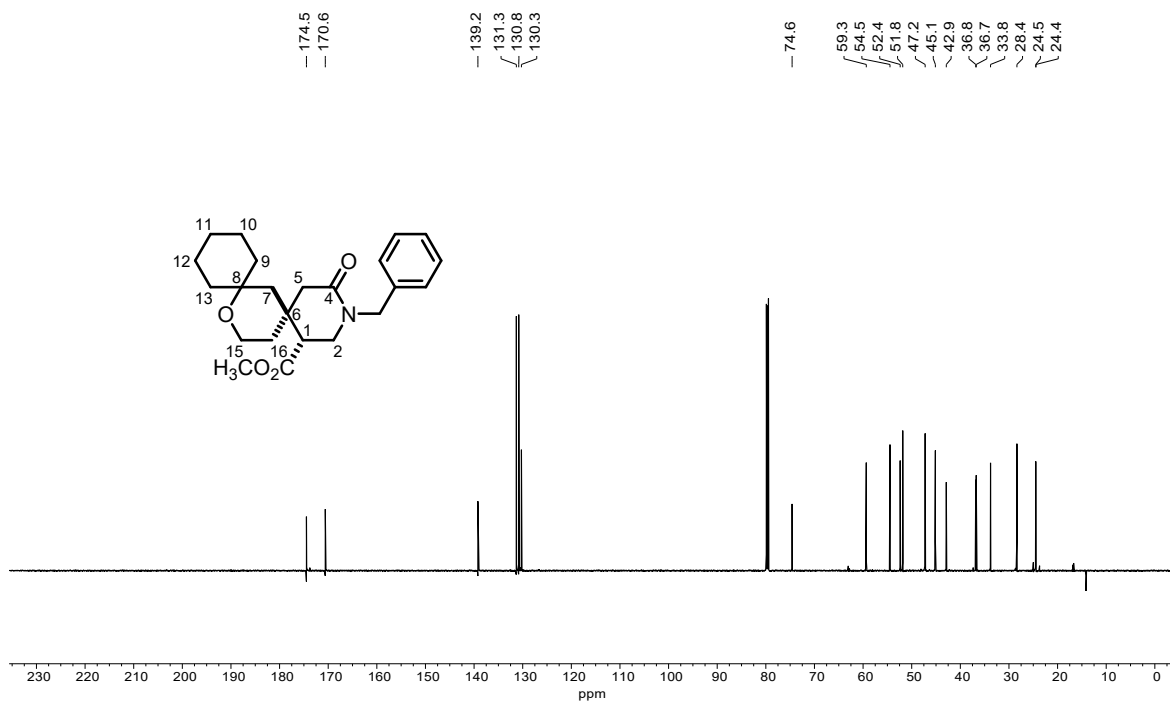

**<sup>13</sup>C NMR spectrum of 18a in CDCl<sub>3</sub>.**

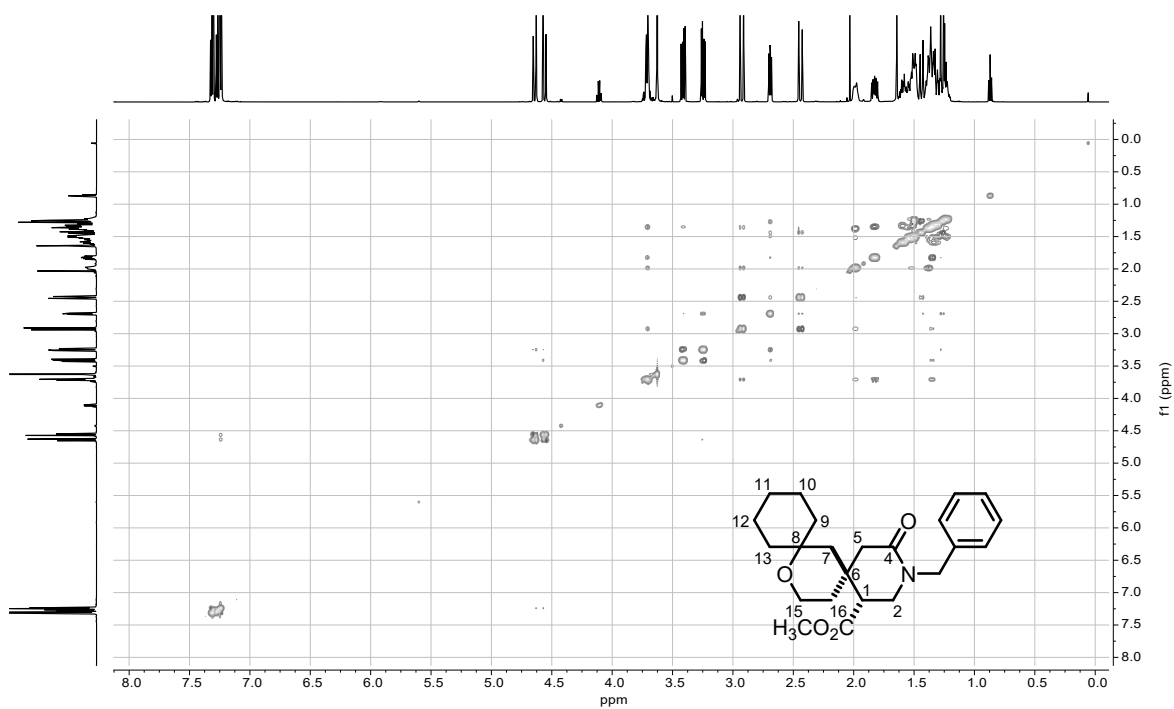

NOESY spectrum of **18a** in  $\text{CDCl}_3$ .

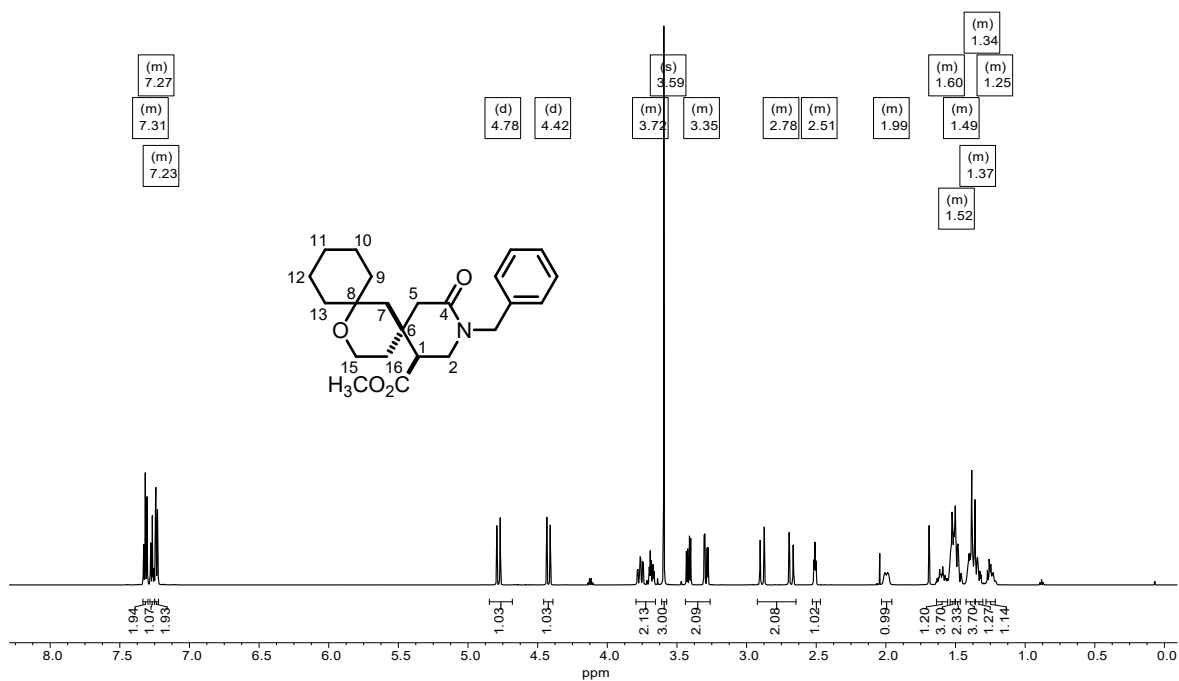

$^1\text{H}$  NMR spectrum of **18b** in  $\text{CDCl}_3$ .



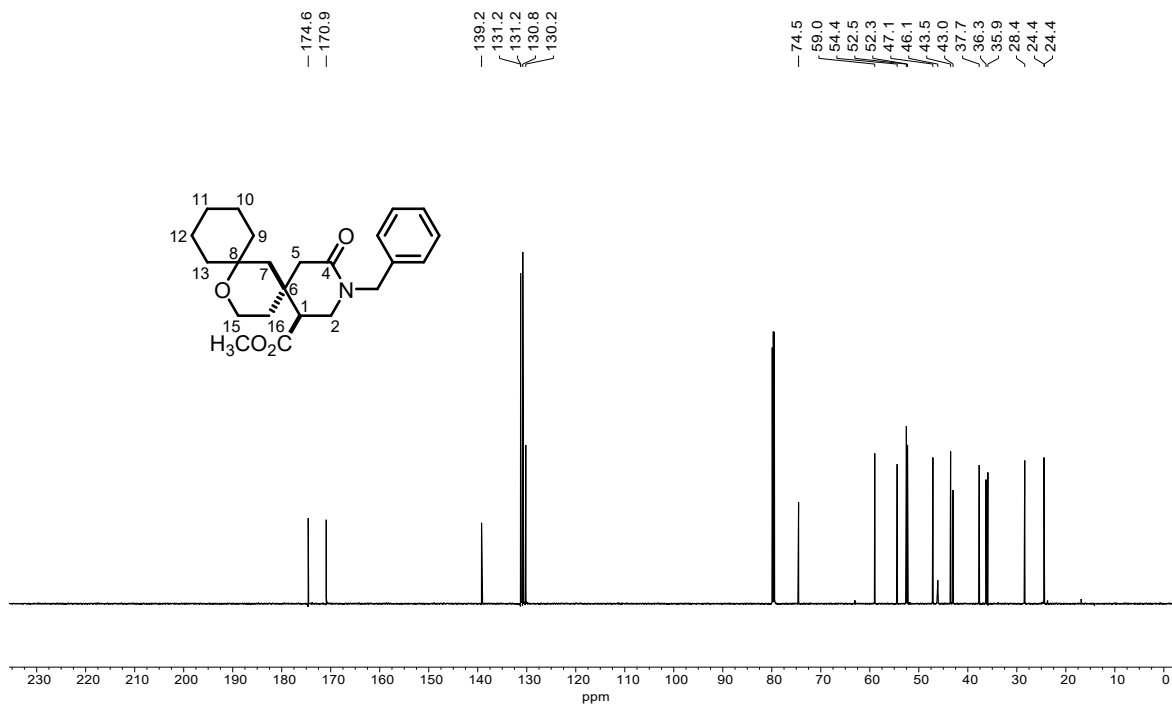

$^{13}\text{C}$  NMR spectrum of **18b** in  $\text{CDCl}_3$ .

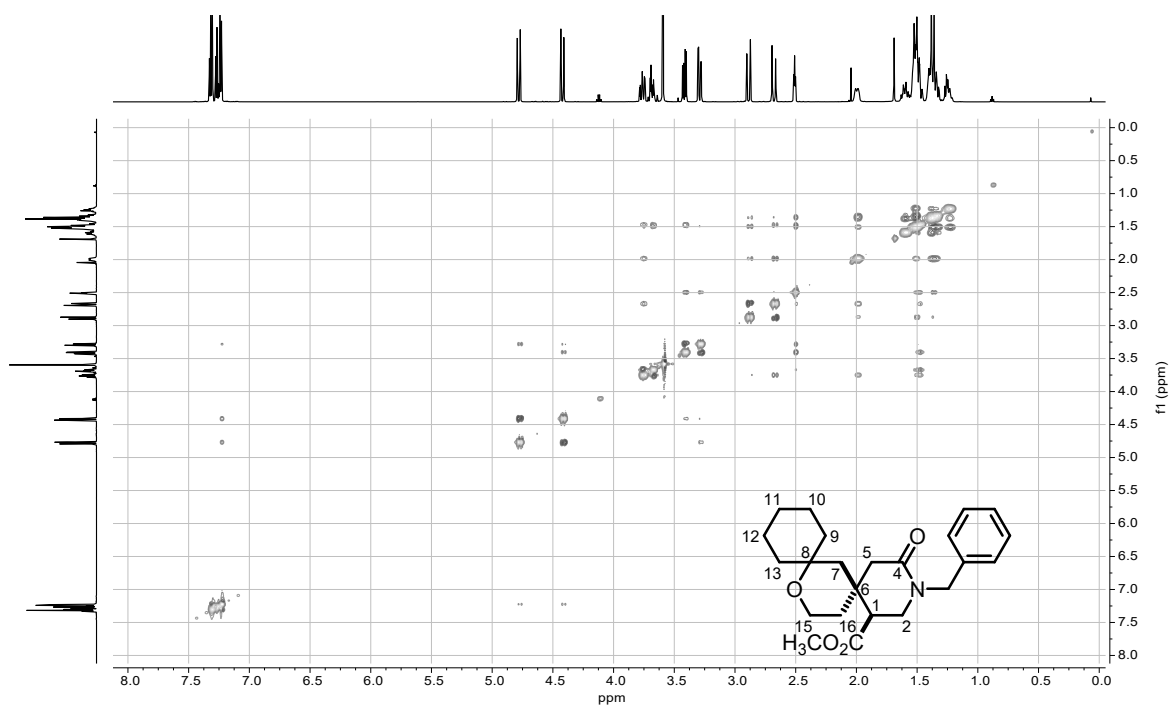

NOESY spectrum of **18b** in  $\text{CDCl}_3$ .

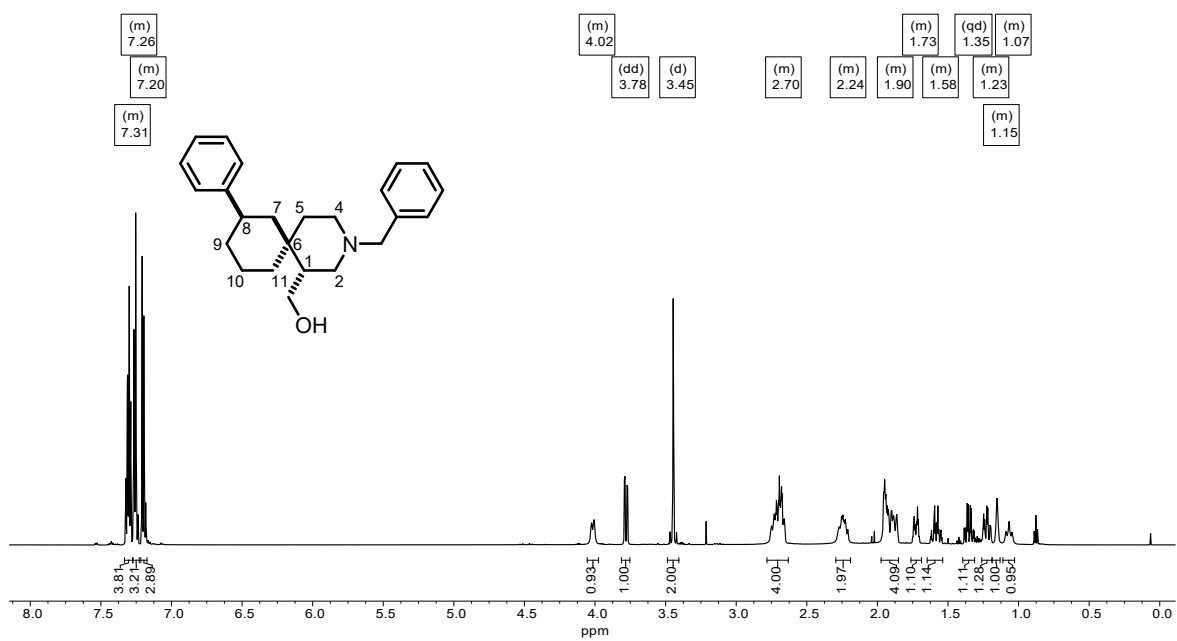

<sup>1</sup>H NMR spectrum of **21a** in CDCl<sub>3</sub>.

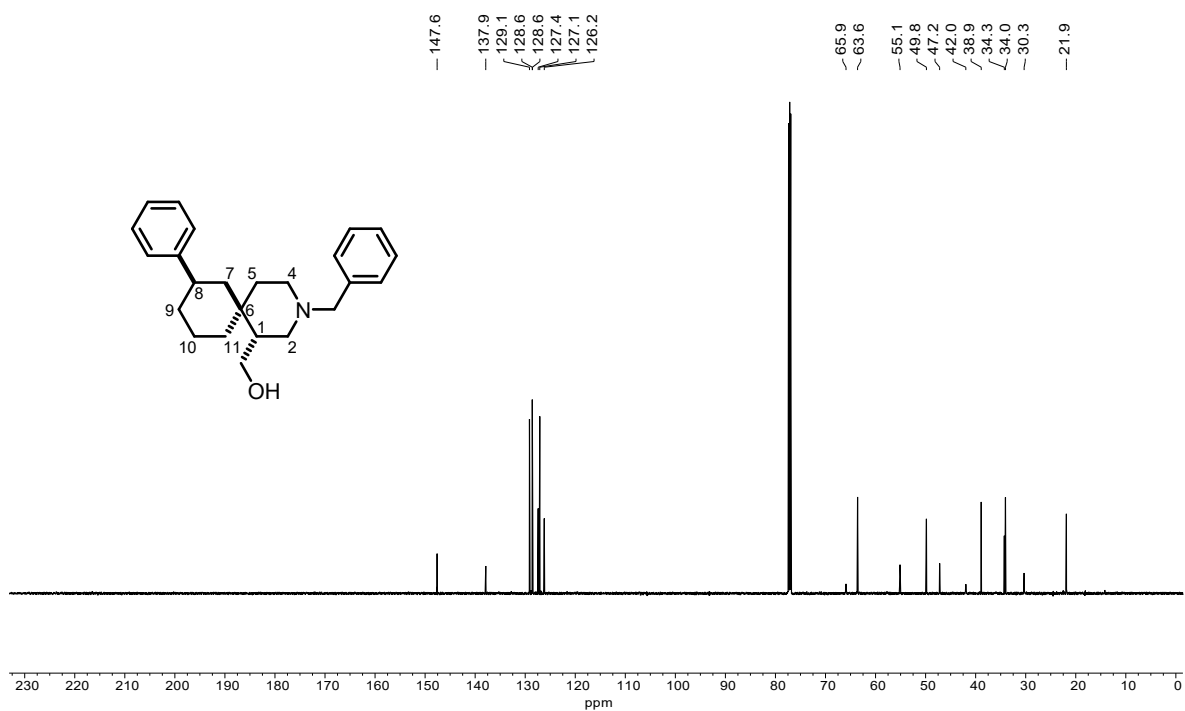

<sup>13</sup>C NMR spectrum of **21a** in CDCl<sub>3</sub>.

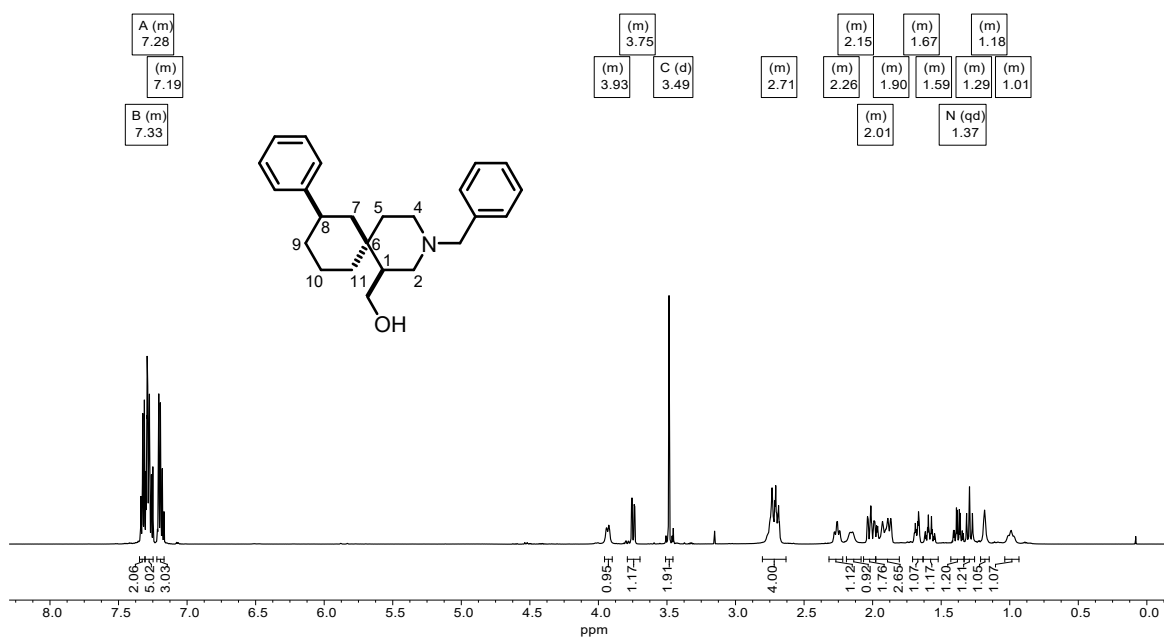

<sup>1</sup>H NMR spectrum of **21b** in CDCl<sub>3</sub>.

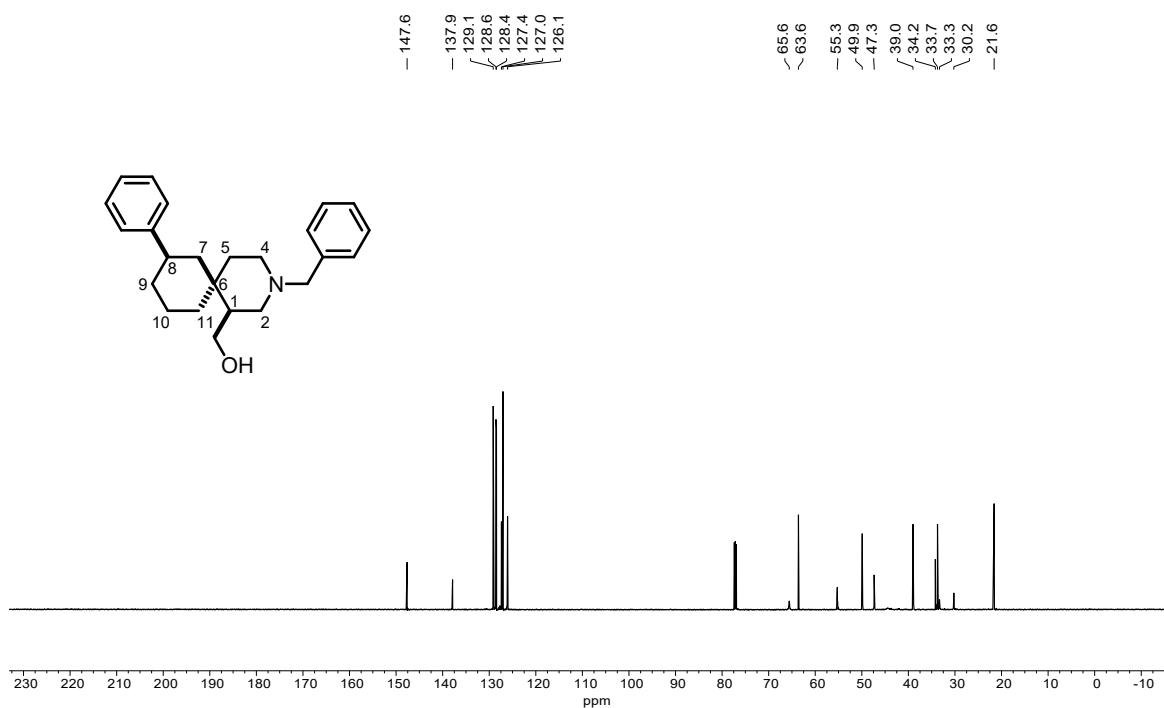

<sup>13</sup>C NMR spectrum of **21b** in CDCl<sub>3</sub>.

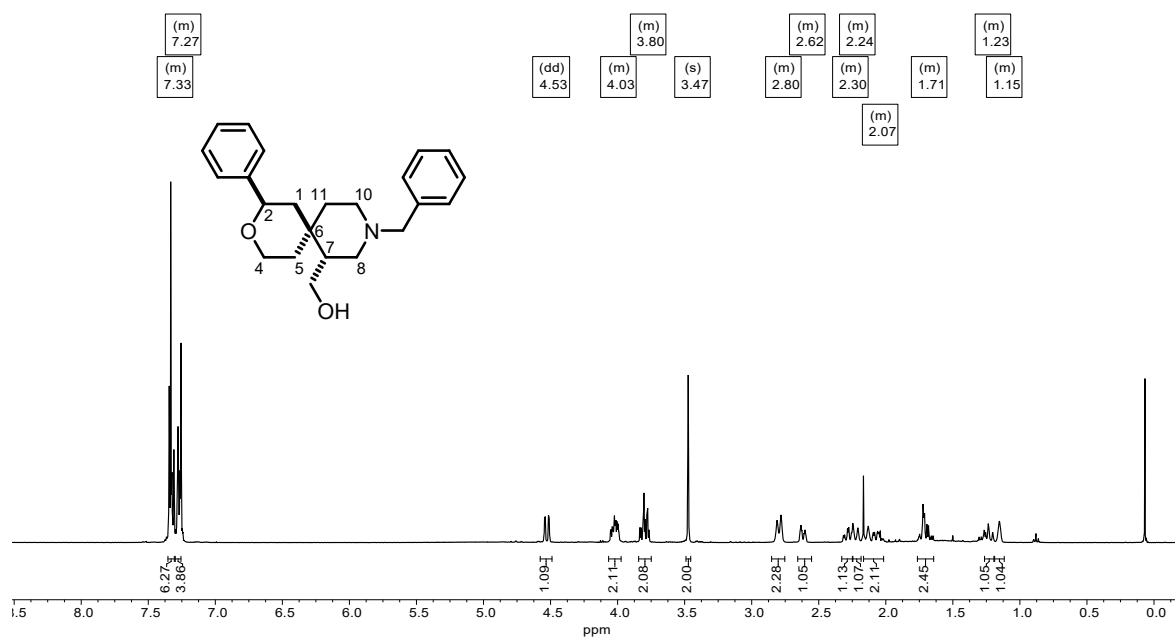

<sup>1</sup>H NMR spectrum of **22a** in CDCl<sub>3</sub>.

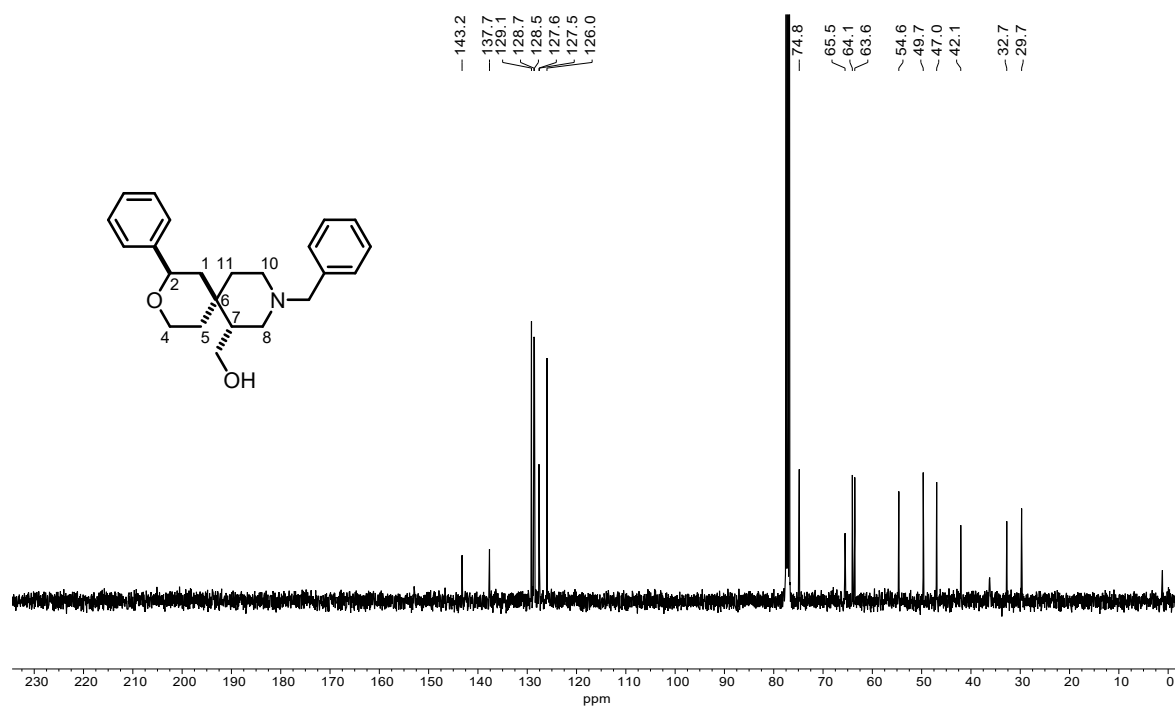

<sup>13</sup>C NMR spectrum of **22a** in CDCl<sub>3</sub>.

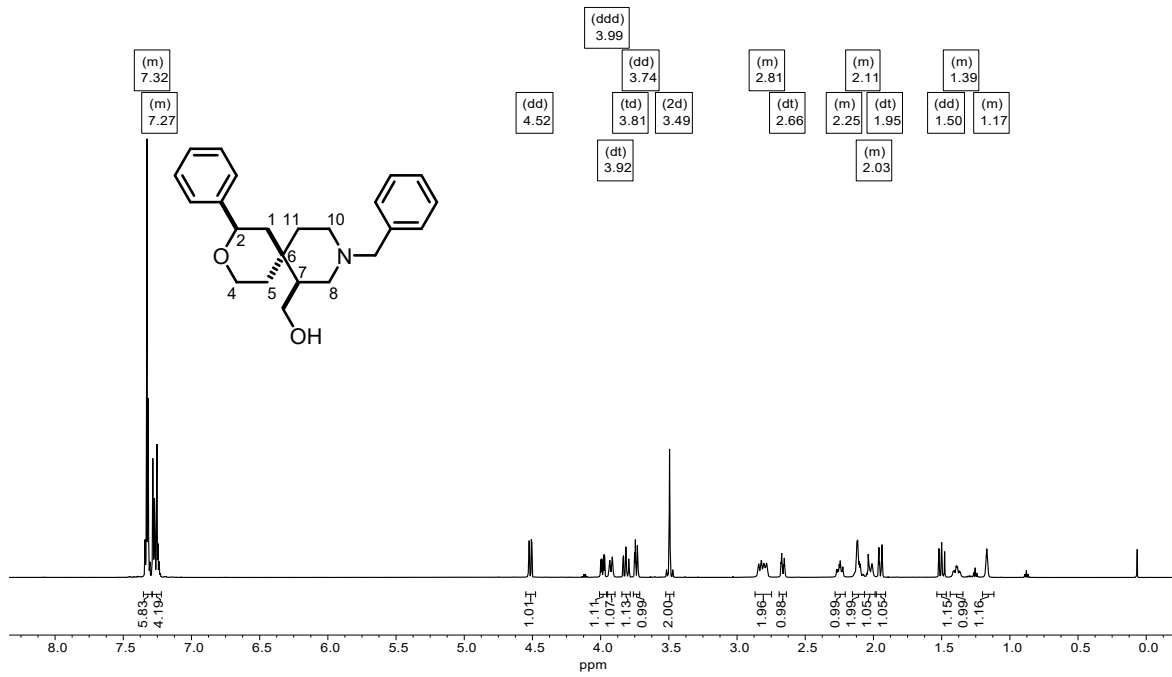

<sup>1</sup>H NMR spectrum of **22b** in CDCl<sub>3</sub>.

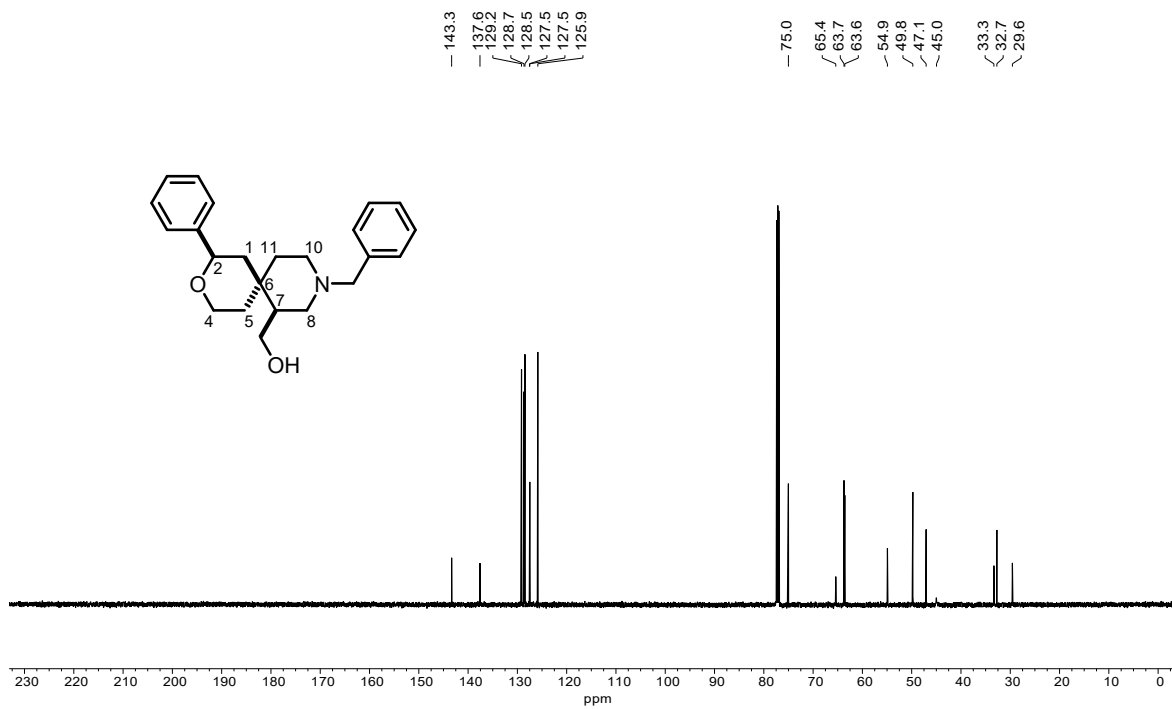

<sup>13</sup>C NMR spectrum of **22b** in CDCl<sub>3</sub>.

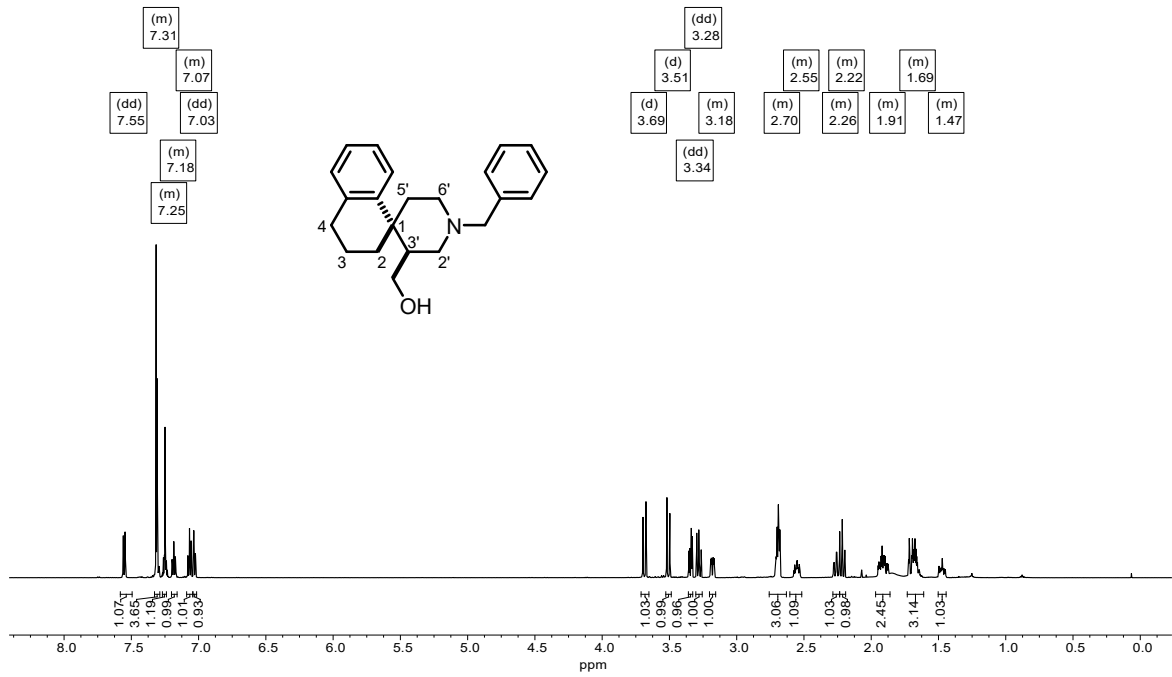

**<sup>1</sup>H NMR spectrum of **24a** in CDCl<sub>3</sub>.**

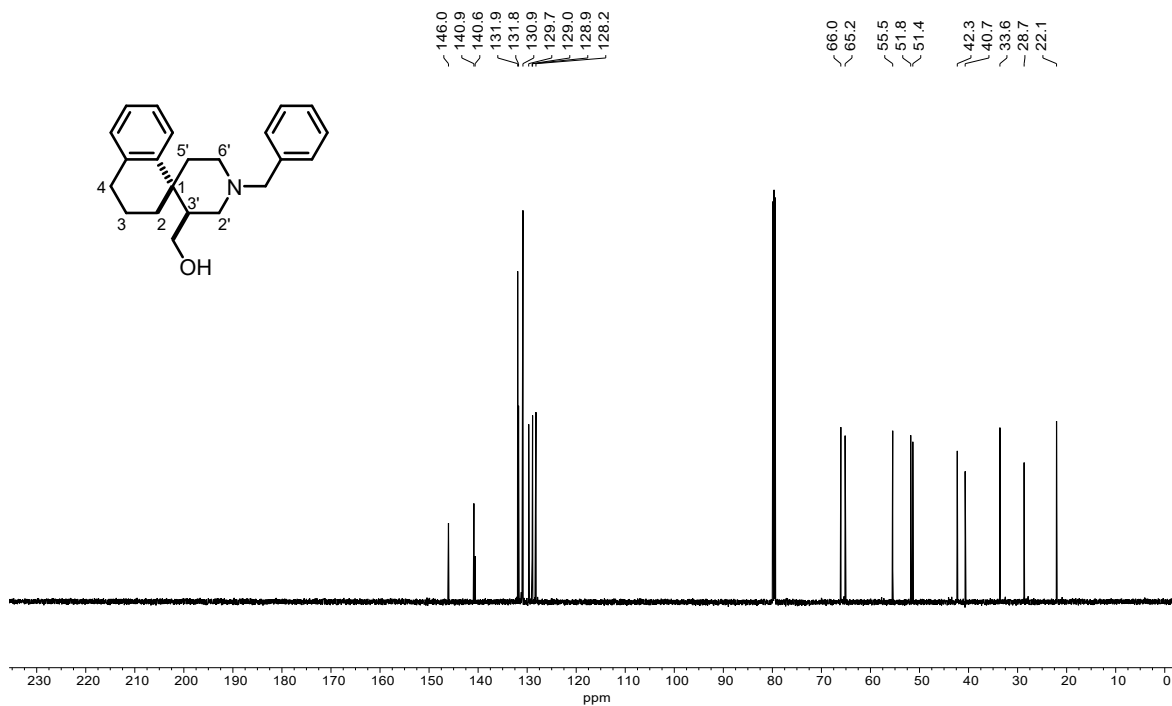

**<sup>13</sup>C NMR spectrum of **24a** in CDCl<sub>3</sub>.**

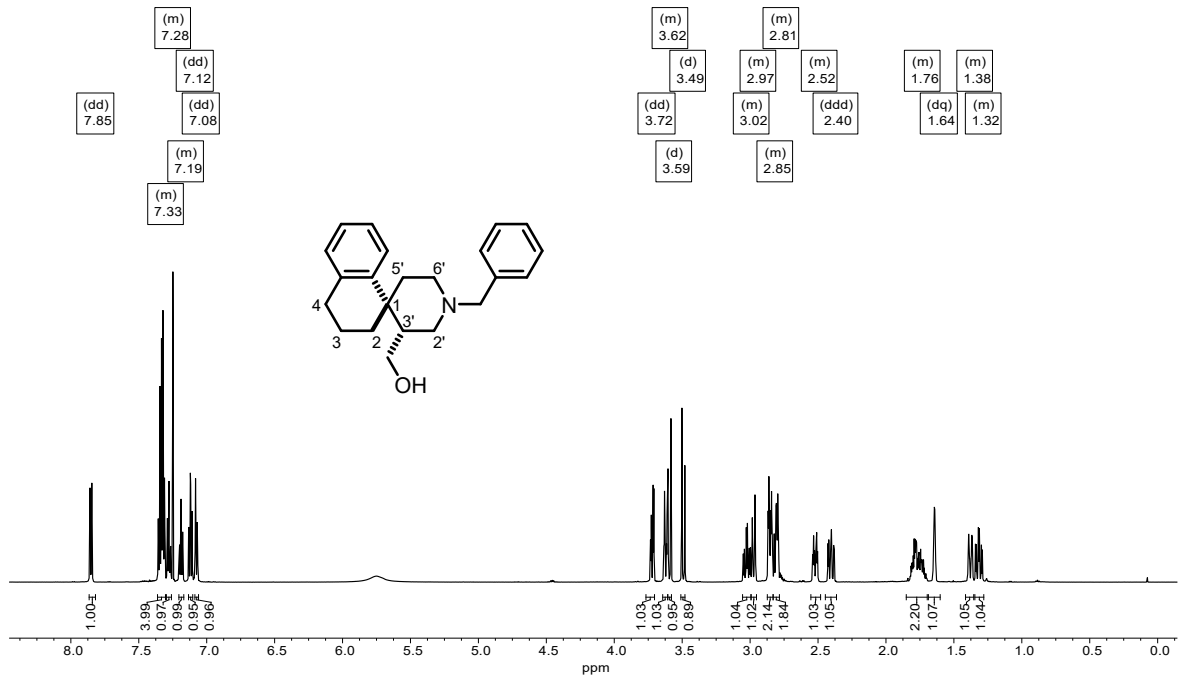

<sup>1</sup>H NMR spectrum of **24b** in CDCl<sub>3</sub>.

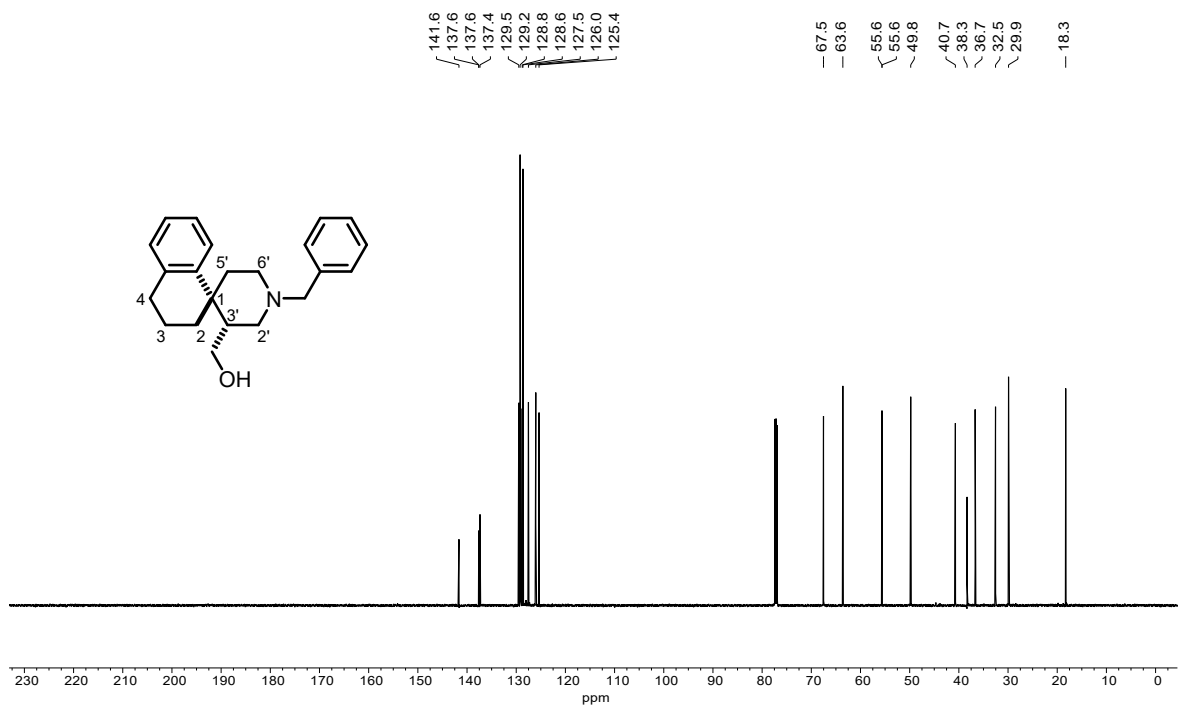

<sup>13</sup>C NMR spectrum of **24b** in CDCl<sub>3</sub>.

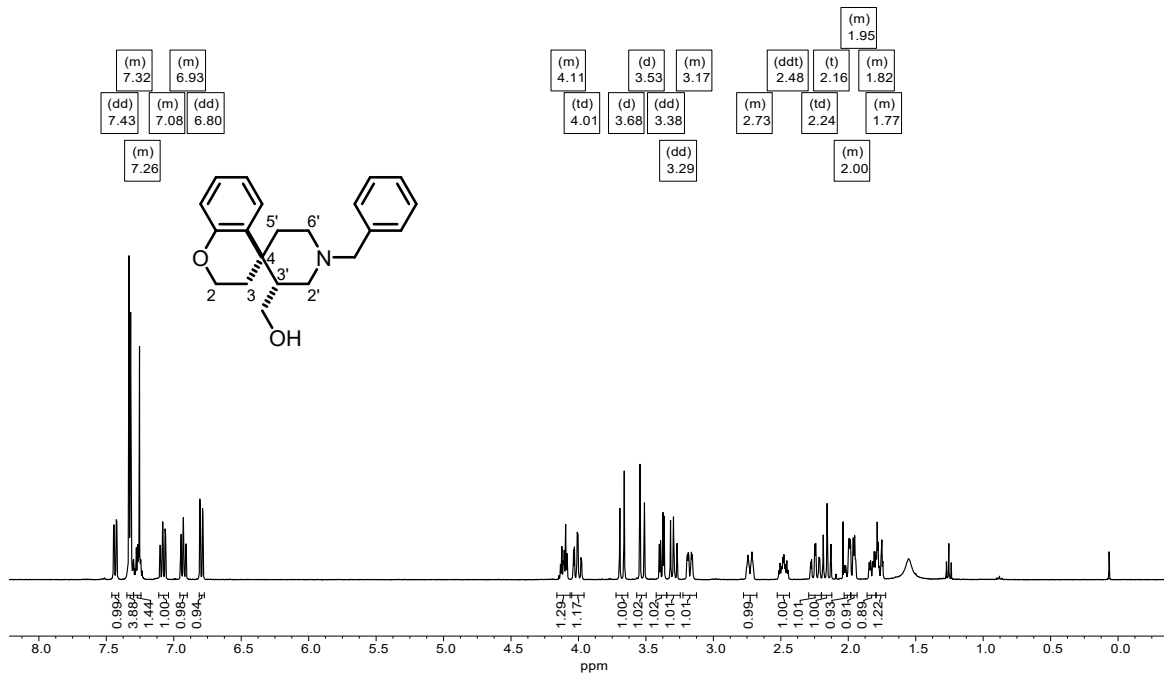

<sup>1</sup>H NMR spectrum of **25a** in CDCl<sub>3</sub>.

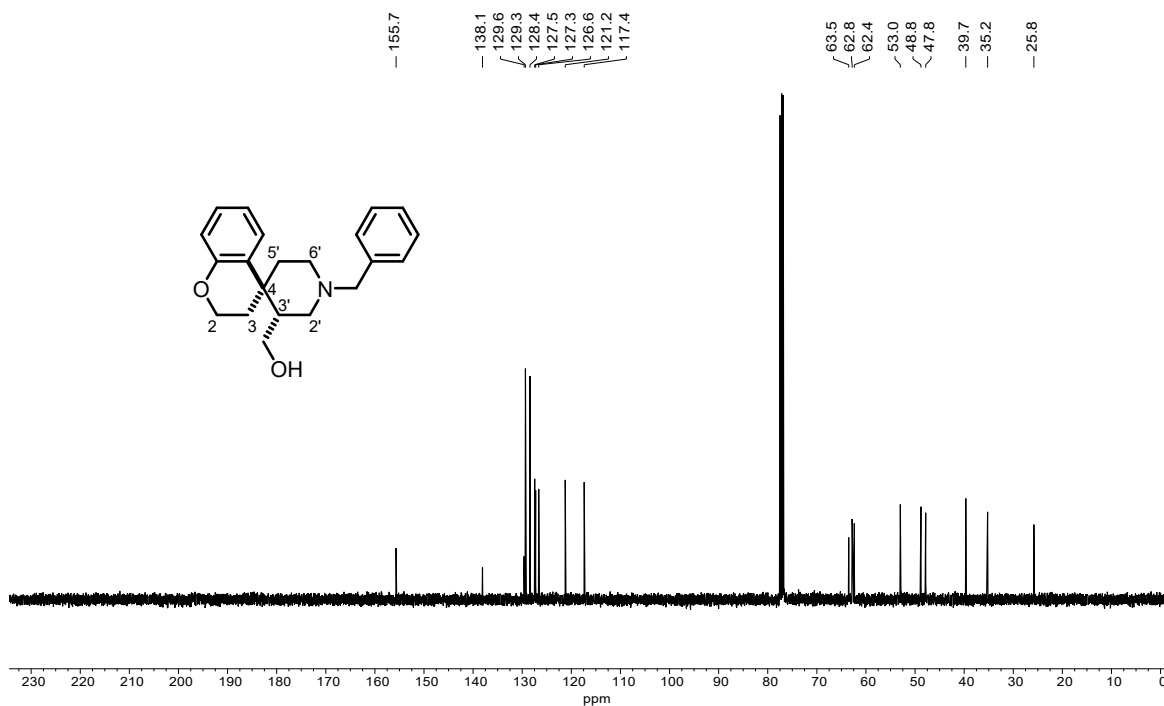

<sup>13</sup>C NMR spectrum of **25a** in CDCl<sub>3</sub>.



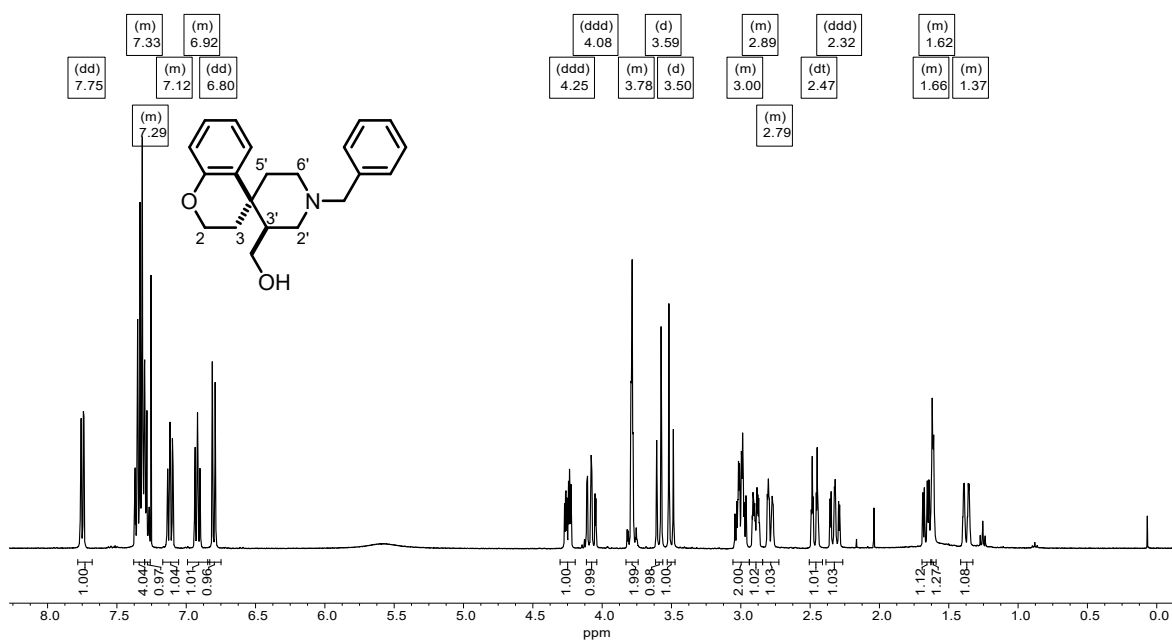

<sup>1</sup>H NMR spectrum of **25b** in CDCl<sub>3</sub>.

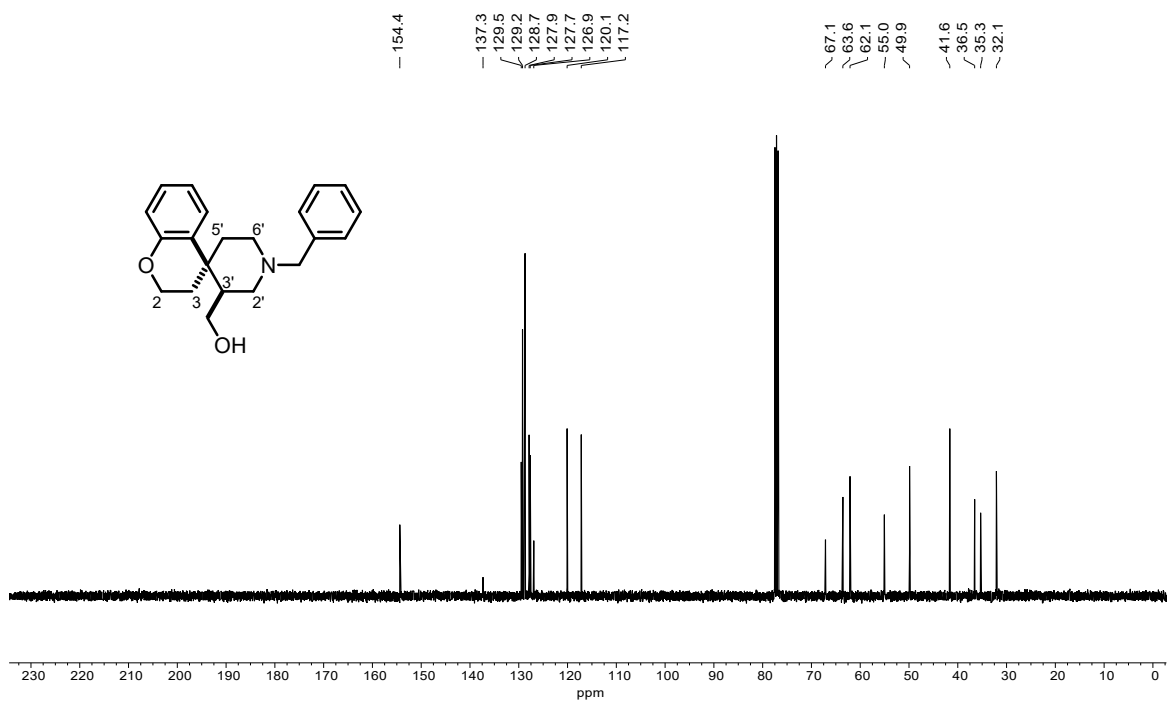

<sup>13</sup>C NMR spectrum of **25b** in CDCl<sub>3</sub>.

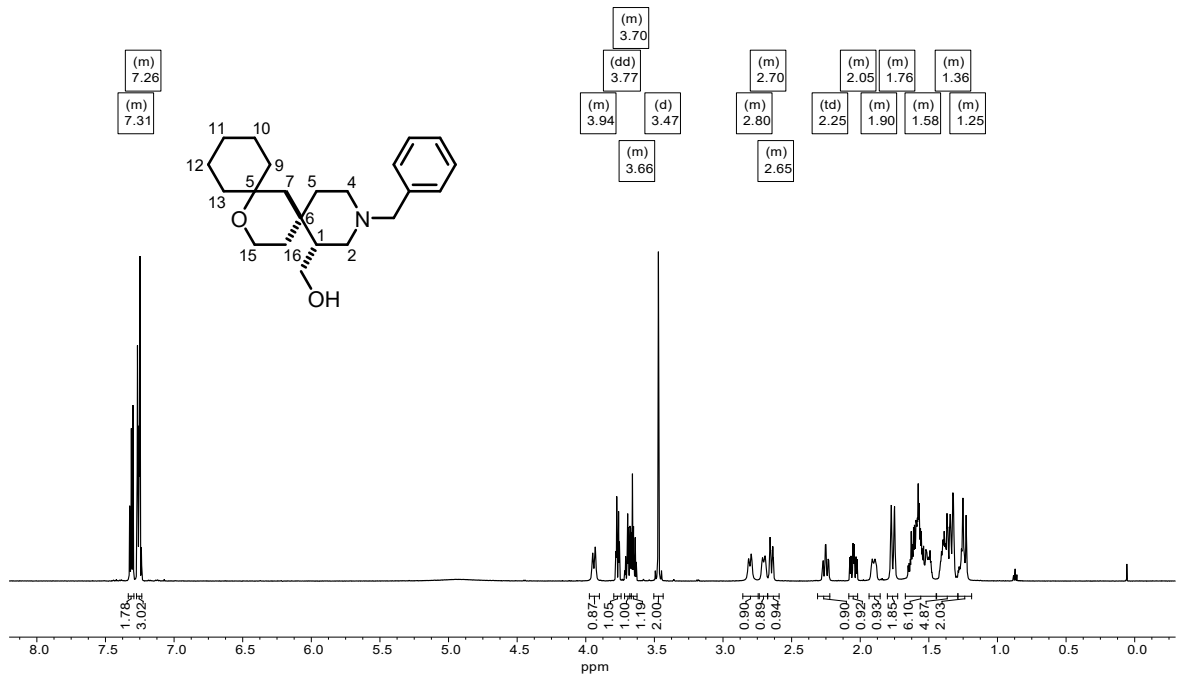

<sup>1</sup>H NMR spectrum of **23a** in CDCl<sub>3</sub>.

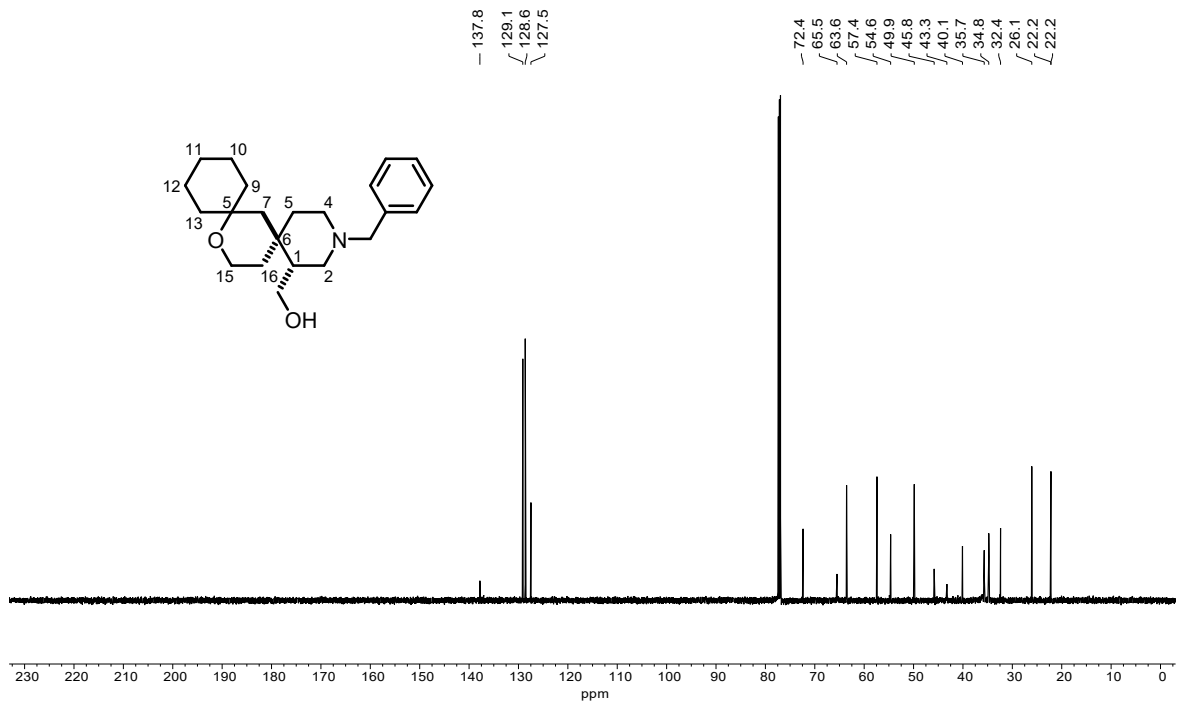

<sup>13</sup>C NMR spectrum of **23a** in CDCl<sub>3</sub>.

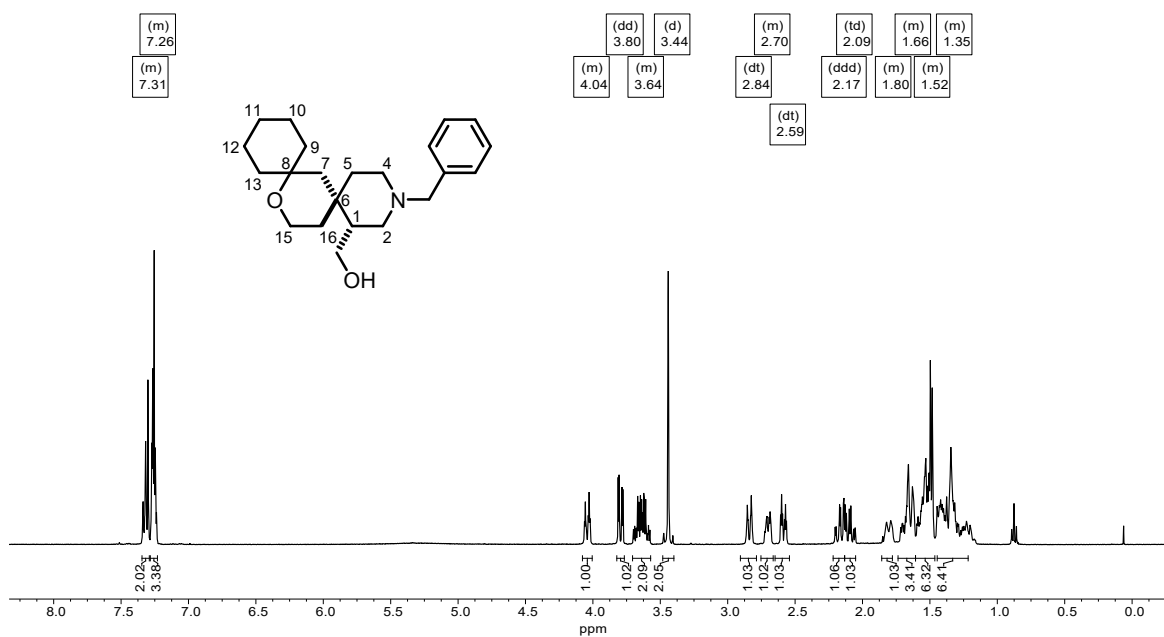

**<sup>1</sup>H NMR spectrum of 23b in CDCl<sub>3</sub>.**

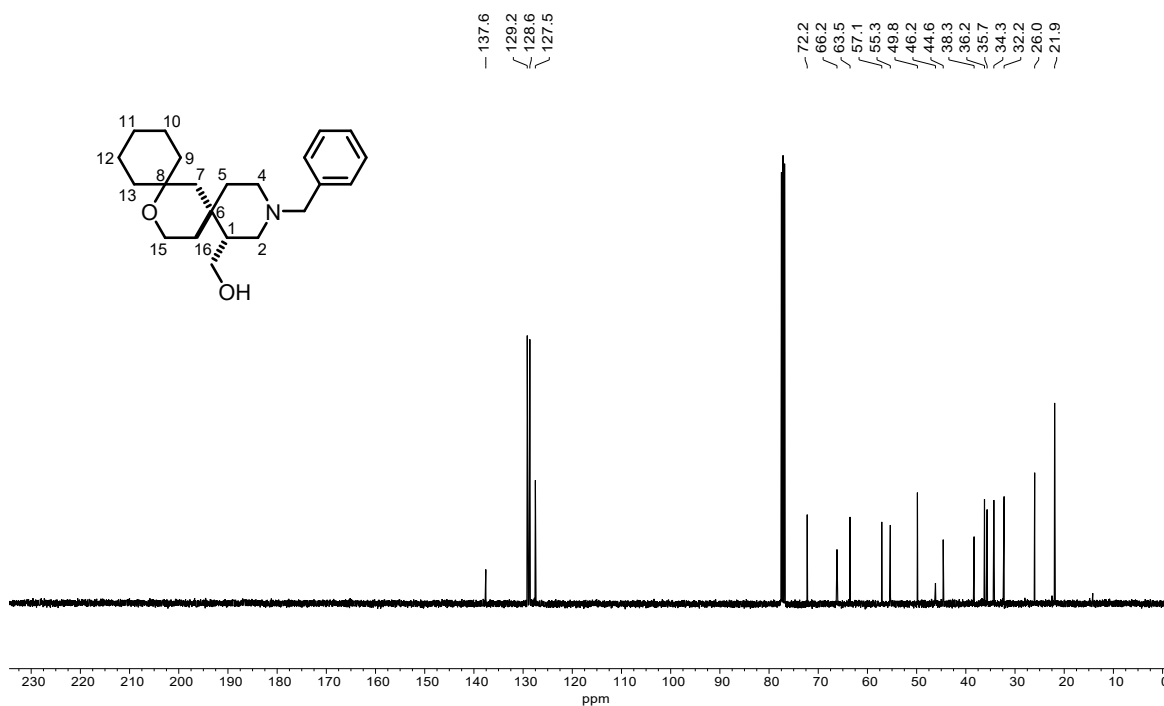

**<sup>13</sup>C NMR spectrum of 23b in CDCl<sub>3</sub>.**

# HPLC purity measurements

## cis-2-Phenyltetrahydro-2H-pyran-4-ol

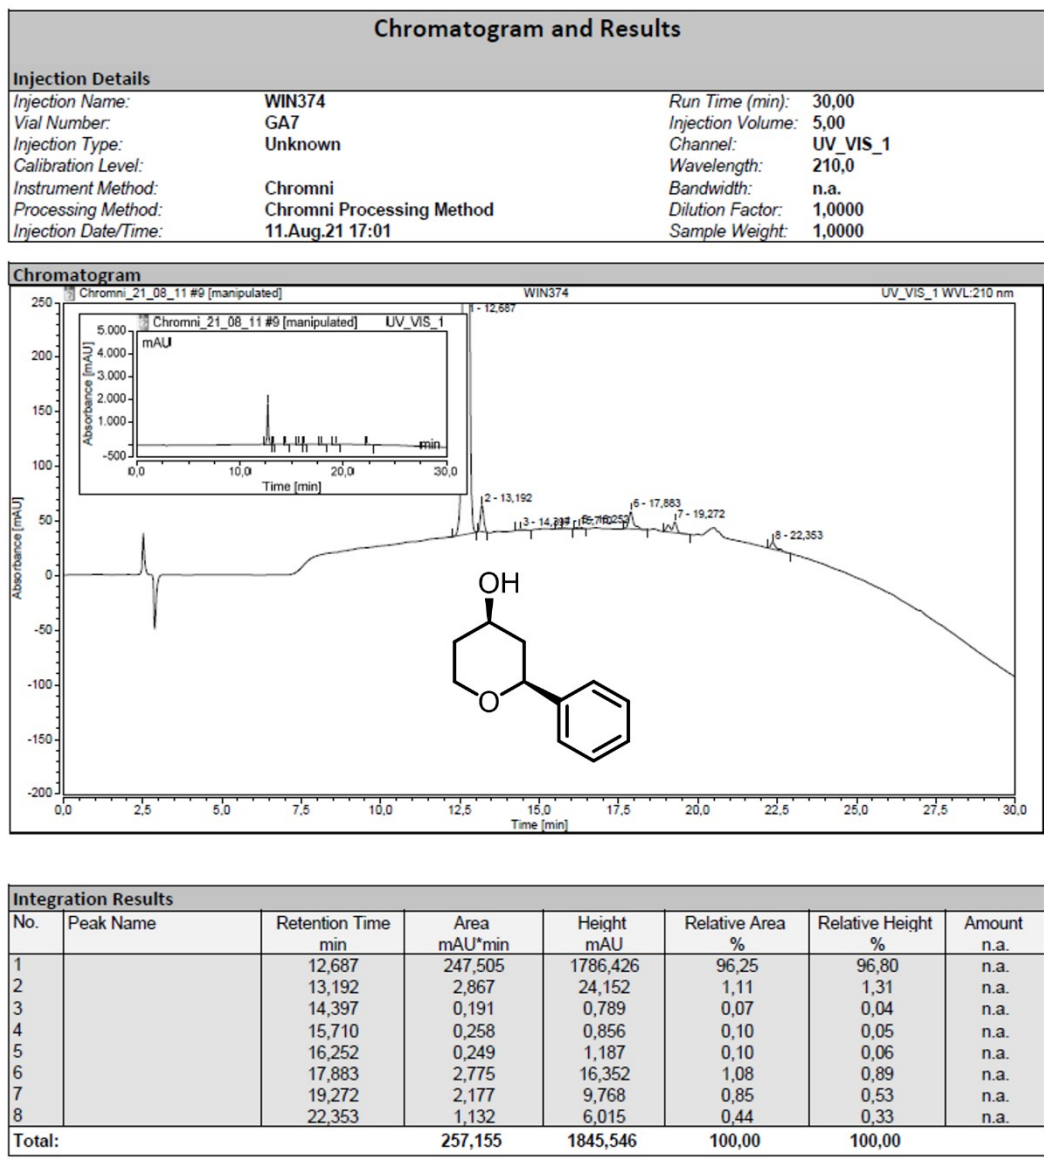

# (RS)-3-Phenylcyclohexan-1-one (3)

| Chromatogram and Results |                           |                   |          |
|--------------------------|---------------------------|-------------------|----------|
| <b>Injection Details</b> |                           |                   |          |
| Injection Name:          | WIN182                    | Run Time (min):   | 30,00    |
| Vial Number:             | GB7                       | Injection Volume: | 5,00     |
| Injection Type:          | Unknown                   | Channel:          | UV_VIS_1 |
| Calibration Level:       |                           | Wavelength:       | 210,0    |
| Instrument Method:       | Chromni                   | Bandwidth:        | n.a.     |
| Processing Method:       | Chromni Processing Method | Dilution Factor:  | 1,0000   |
| Injection Date/Time:     | 23.Sep.20 20:23           | Sample Weight:    | 1,0000   |

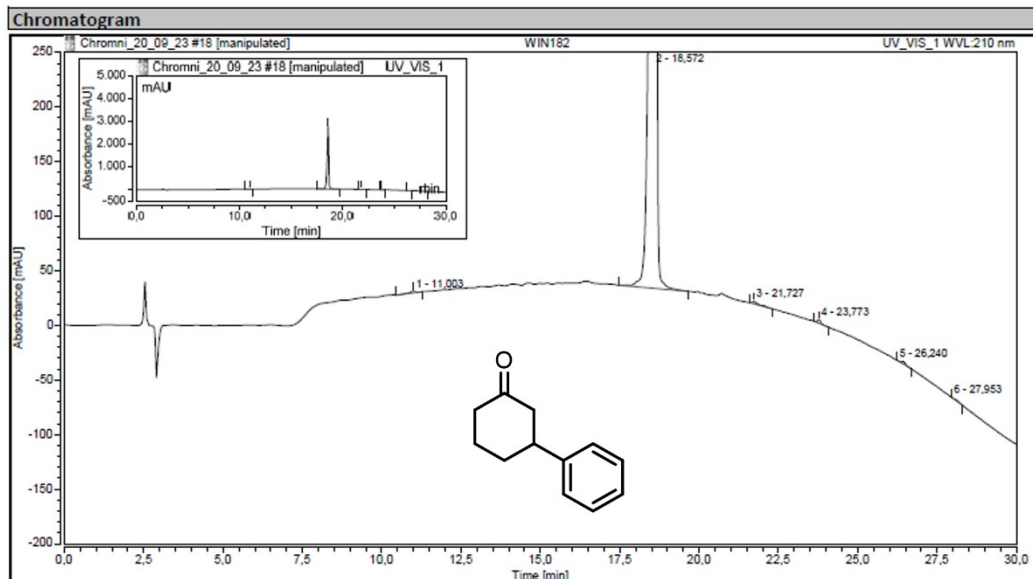

| Integration Results |           |                       |                 |                 |                    |                      |                |
|---------------------|-----------|-----------------------|-----------------|-----------------|--------------------|----------------------|----------------|
| No.                 | Peak Name | Retention Time<br>min | Area<br>mAU*min | Height<br>mAU   | Relative Area<br>% | Relative Height<br>% | Amount<br>n.a. |
| 1                   |           | 11,003                | 0,271           | 1,618           | 0,06               | 0,06                 | n.a.           |
| 2                   |           | 18,572                | 441,004         | 2740,328        | 99,62              | 99,73                | n.a.           |
| 3                   |           | 21,727                | 0,508           | 2,242           | 0,11               | 0,08                 | n.a.           |
| 4                   |           | 23,773                | 0,423           | 3,517           | 0,10               | 0,13                 | n.a.           |
| 5                   |           | 26,240                | 0,332           | 0,000           | 0,07               | 0,00                 | n.a.           |
| 6                   |           | 27,953                | 0,147           | 0,000           | 0,03               | 0,00                 | n.a.           |
| <b>Total:</b>       |           |                       | <b>442,685</b>  | <b>2747,705</b> | <b>100,00</b>      | <b>100,00</b>        |                |

## (RS)-2-Phenyltetrahydropyran-4-one (9)

| Chromatogram and Results |                           |                         |
|--------------------------|---------------------------|-------------------------|
| <b>Injection Details</b> |                           |                         |
| Injection Name:          | WIN368                    | Run Time (min): 30,00   |
| Vial Number:             | GA6                       | Injection Volume: 5,00  |
| Injection Type:          | Unknown                   | Channel: UV_VIS_1       |
| Calibration Level:       |                           | Wavelength: 210,0       |
| Instrument Method:       | Chromni                   | Bandwidth: n.a.         |
| Processing Method:       | Chromni Processing Method | Dilution Factor: 1,0000 |
| Injection Date/Time:     | 11.Aug.21 16:20           | Sample Weight: 1,0000   |

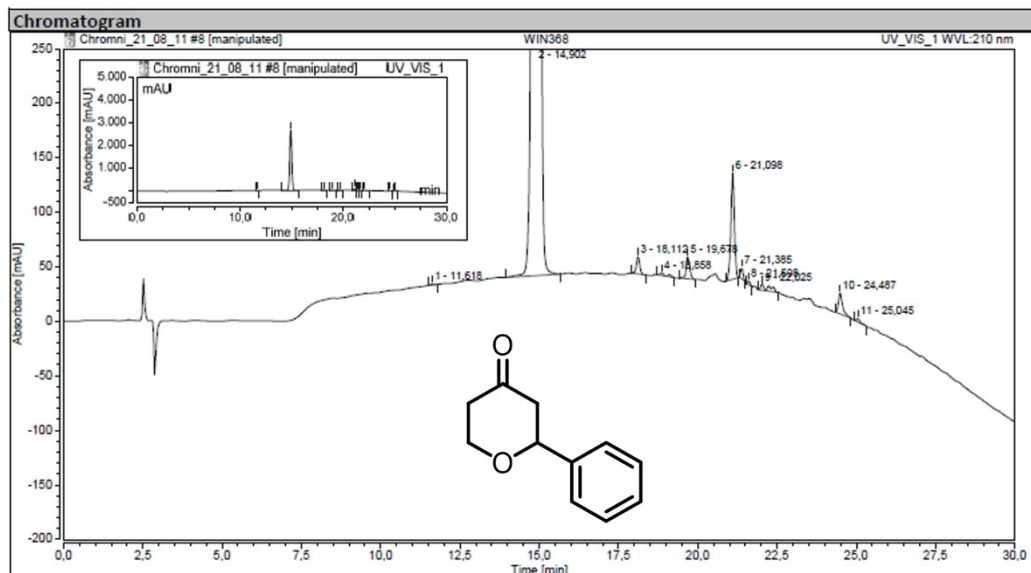

| Integration Results |           |                       |                 |                 |                    |                      |                |
|---------------------|-----------|-----------------------|-----------------|-----------------|--------------------|----------------------|----------------|
| No.                 | Peak Name | Retention Time<br>min | Area<br>mAU*min | Height<br>mAU   | Relative Area<br>% | Relative Height<br>% | Amount<br>n.a. |
| 1                   |           | 11,618                | 0,115           | 1,006           | 0,02               | 0,04                 | n.a.           |
| 2                   |           | 14,902                | 577,110         | 2644,677        | 96,04              | 93,65                | n.a.           |
| 3                   |           | 18,112                | 1,965           | 16,148          | 0,33               | 0,57                 | n.a.           |
| 4                   |           | 18,858                | 0,539           | 2,519           | 0,09               | 0,09                 | n.a.           |
| 5                   |           | 19,678                | 2,745           | 20,413          | 0,46               | 0,72                 | n.a.           |
| 6                   |           | 21,098                | 12,340          | 97,800          | 2,05               | 3,46                 | n.a.           |
| 7                   |           | 21,385                | 0,914           | 9,859           | 0,15               | 0,35                 | n.a.           |
| 8                   |           | 21,598                | 0,332           | 3,365           | 0,06               | 0,12                 | n.a.           |
| 9                   |           | 22,025                | 1,582           | 5,714           | 0,26               | 0,20                 | n.a.           |
| 10                  |           | 24,487                | 2,859           | 19,341          | 0,48               | 0,68                 | n.a.           |
| 11                  |           | 25,045                | 0,432           | 3,021           | 0,07               | 0,11                 | n.a.           |
| <b>Total:</b>       |           |                       | <b>600,932</b>  | <b>2823,865</b> | <b>100,00</b>      | <b>100,00</b>        |                |

Ethyl (*RS,E*)-2-(3-phenylcyclohexylidene)acetate ((*E*)-4) and ethyl (*RS,Z*)-2-(3-phenylcyclohexylidene)acetate ((*Z*)-4)

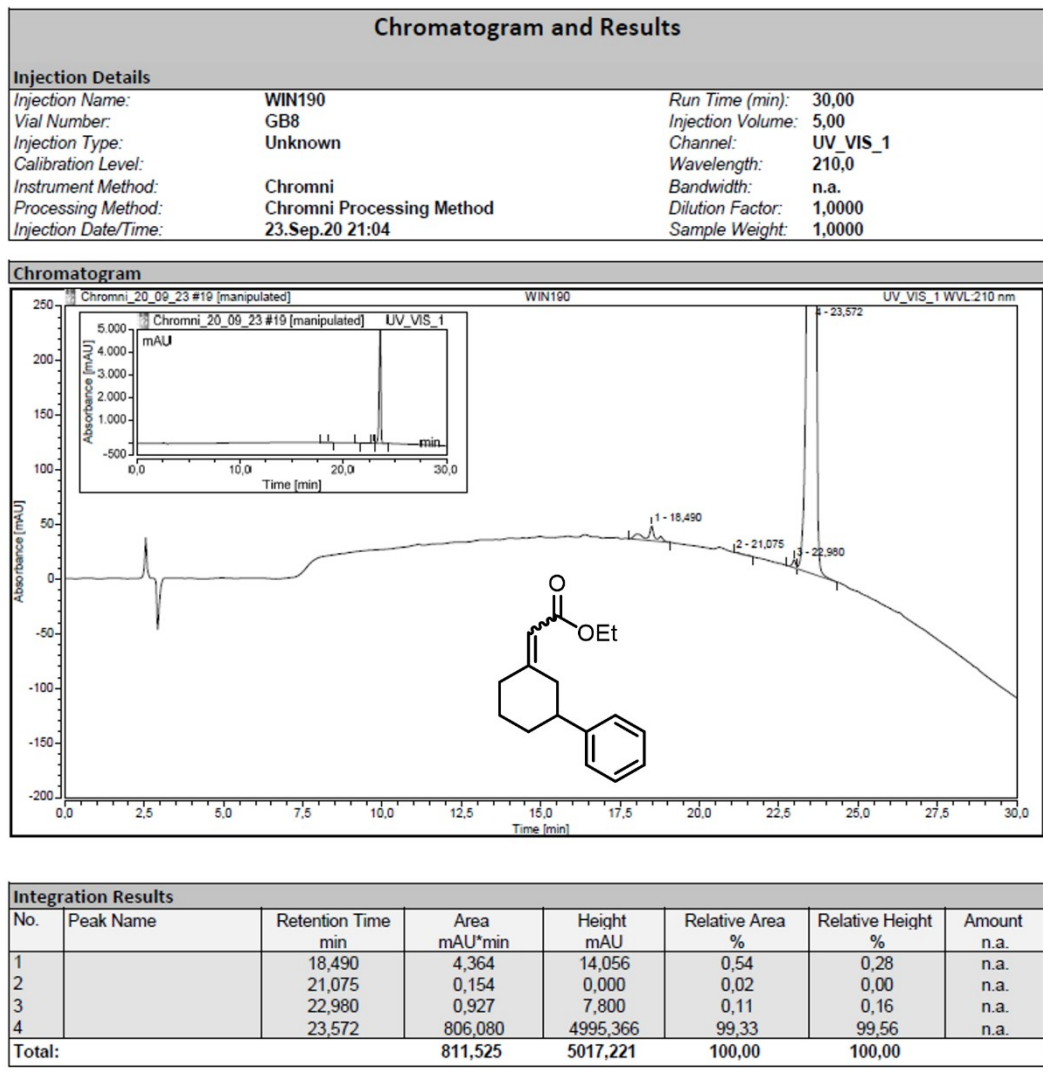

**(*RS,E*)-*N*-Benzyl-2-(3-phenylcyclohexylidene)acetamide ((*E*)-6) and (*RS,Z*)-*N*-benzyl-2-(3-phenylcyclohexylidene)acetamide ((*Z*)-6)**

| Chromatogram and Results |                           |                         |
|--------------------------|---------------------------|-------------------------|
| <b>Injection Details</b> |                           |                         |
| Injection Name:          | WIN331                    | Run Time (min): 30,00   |
| Vial Number:             | GC5                       | Injection Volume: 5,00  |
| Injection Type:          | Unknown                   | Channel: UV_VIS_1       |
| Calibration Level:       |                           | Wavelength: 210,0       |
| Instrument Method:       | Chromni                   | Bandwidth: n.a.         |
| Processing Method:       | Chromni Processing Method | Dilution Factor: 1,0000 |
| Injection Date/Time:     | 20.Mai.21 03:03           | Sample Weight: 1,0000   |

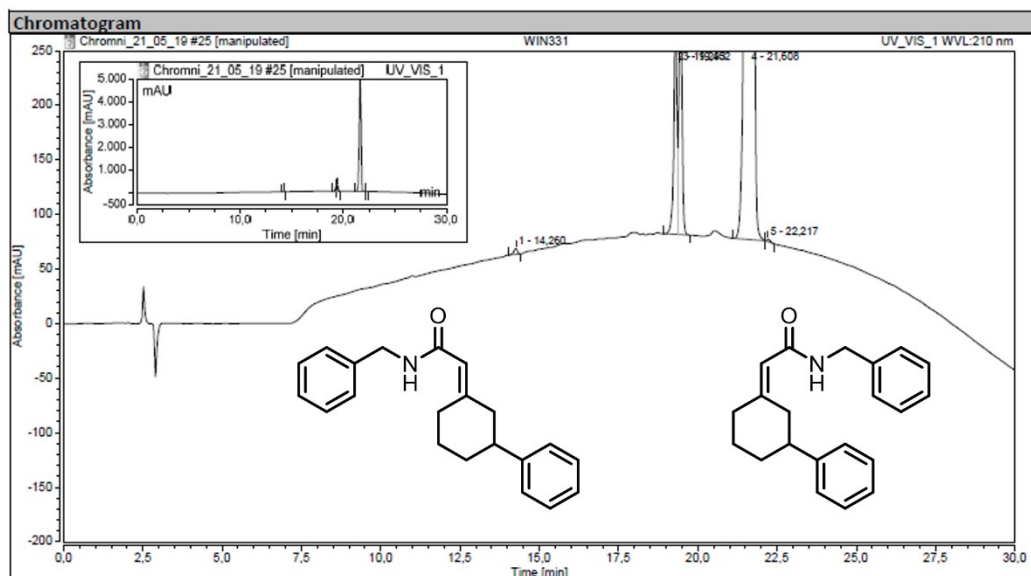

| Integration Results |           |                       |                 |                 |                    |                      |                |
|---------------------|-----------|-----------------------|-----------------|-----------------|--------------------|----------------------|----------------|
| No.                 | Peak Name | Retention Time<br>min | Area<br>mAU*min | Height<br>mAU   | Relative Area<br>% | Relative Height<br>% | Amount<br>n.a. |
| 1                   |           | 14,260                | 0,710           | 5,425           | 0,06               | 0,10                 | n.a.           |
| 2                   |           | 19,293                | 22,319          | 200,355         | 1,94               | 3,71                 | n.a.           |
| 3                   |           | 19,452                | 28,063          | 268,893         | 2,44               | 4,98                 | n.a.           |
| 4                   |           | 21,608                | 1098,168        | 4922,996        | 95,53              | 91,16                | n.a.           |
| 5                   |           | 22,217                | 0,292           | 2,448           | 0,03               | 0,05                 | n.a.           |
| <b>Total:</b>       |           |                       | <b>1149,553</b> | <b>5400,117</b> | <b>100,00</b>      | <b>100,00</b>        |                |



**(*RS,E*)-*N*-Benzyl-2-(2-phenyltetrahydro-4*H*-pyran-4-ylidene)acetamide (*(E)*-13)**  
**and (*RS,Z*)-*N*-benzyl-2-(2-phenyltetrahydro-4*H*-pyran-4-ylidene)acetamide (*(Z)*-13)**

| Chromatogram and Results |                           |                         |
|--------------------------|---------------------------|-------------------------|
| <b>Injection Details</b> |                           |                         |
| Injection Name:          | WIN400                    | Run Time (min): 30,00   |
| Vial Number:             | GA2                       | Injection Volume: 5,00  |
| Injection Type:          | Unknown                   | Channel: UV_VIS_1       |
| Calibration Level:       |                           | Wavelength: 210,0       |
| Instrument Method:       | Chromni                   | Bandwidth: n.a.         |
| Processing Method:       | Chromni Processing Method | Dilution Factor: 1,0000 |
| Injection Date/Time:     | 11.Mai.22 18:06           | Sample Weight: 1,0000   |

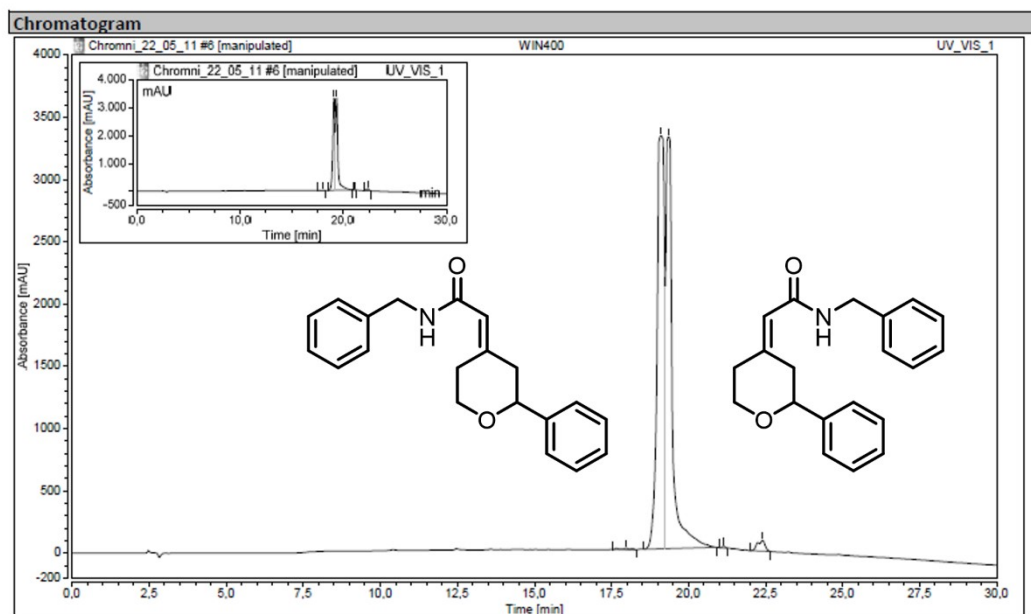

| Integration Results |           |                       |                 |                 |                    |                      |                |
|---------------------|-----------|-----------------------|-----------------|-----------------|--------------------|----------------------|----------------|
| No.                 | Peak Name | Retention Time<br>min | Area<br>mAU*min | Height<br>mAU   | Relative Area<br>% | Relative Height<br>% | Amount<br>n.a. |
| 1                   |           | 17,982                | 4,108           | 12,356          | 0,23               | 0,18                 | n.a.           |
| 2                   |           | 19,102                | 901,219         | 3316,019        | 51,14              | 49,25                | n.a.           |
| 3                   |           | 19,357                | 831,063         | 3304,252        | 47,16              | 49,08                | n.a.           |
| 4                   |           | 21,140                | 1,511           | 13,739          | 0,09               | 0,20                 | n.a.           |
| 5                   |           | 22,403                | 24,435          | 86,555          | 1,39               | 1,29                 | n.a.           |
| <b>Total:</b>       |           |                       | <b>1762,335</b> | <b>6732,921</b> | <b>100,00</b>      | <b>100,00</b>        |                |

**(E)-N-Benzyl-2-(1-oxaspiro[5.5]undecan-4-ylidene)acetamide ((E)-14) and (Z)-N-benzyl-2-(1-oxaspiro[5.5]undecan-4-ylidene)acetamide ((Z)-14)**

| Chromatogram and Results |                           |                         |
|--------------------------|---------------------------|-------------------------|
| <b>Injection Details</b> |                           |                         |
| Injection Name:          | WIN410                    | Run Time (min): 30,00   |
| Vial Number:             | GB4                       | Injection Volume: 5,00  |
| Injection Type:          | Unknown                   | Channel: UV_VIS_1       |
| Calibration Level:       |                           | Wavelength: 210,0       |
| Instrument Method:       | Chromni                   | Bandwidth: n.a.         |
| Processing Method:       | Chromni Processing Method | Dilution Factor: 1,0000 |
| Injection Date/Time:     | 21.Apr.22 00:52           | Sample Weight: 1,0000   |

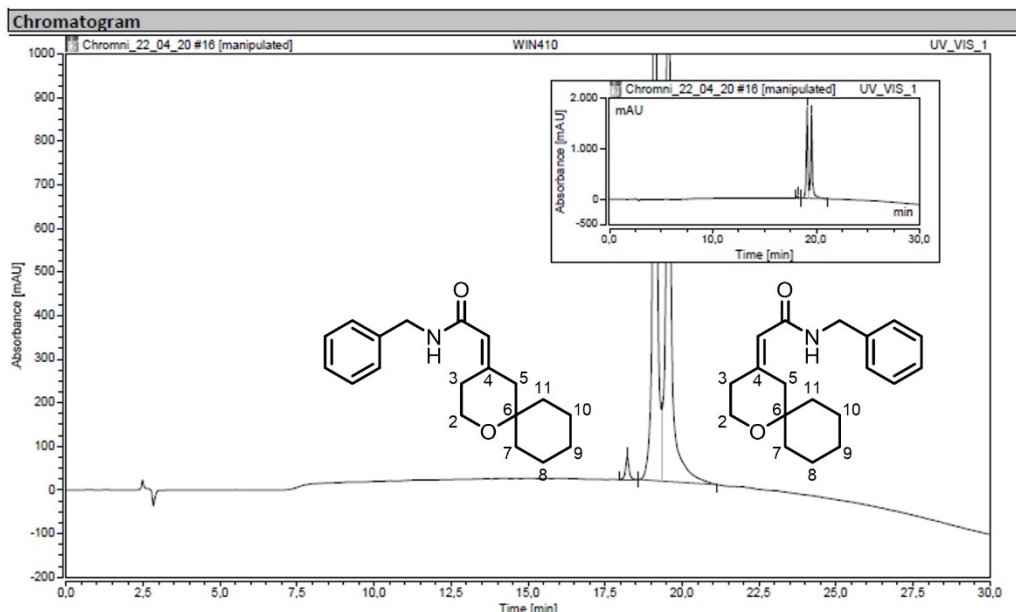

| Integration Results |           |                    |                |                 |                 |                   |             |
|---------------------|-----------|--------------------|----------------|-----------------|-----------------|-------------------|-------------|
| No.                 | Peak Name | Retention Time min | Area mAU*min   | Height mAU      | Relative Area % | Relative Height % | Amount n.a. |
| 1                   |           | 18,220             | 6,938          | 53,841          | 1,22            | 1,52              | n.a.        |
| 2                   |           | 19,112             | 274,713        | 1823,383        | 48,16           | 51,39             | n.a.        |
| 3                   |           | 19,550             | 288,774        | 1670,617        | 50,62           | 47,09             | n.a.        |
| <b>Total:</b>       |           |                    | <b>570,425</b> | <b>3547,841</b> | <b>100,00</b>   | <b>100,00</b>     |             |

# (E)-N-Benzyl-2-(3,4-dihydronaphthalen-1[2H]-yliden)acetamide (15)

| Chromatogram and Results |                           |                         |
|--------------------------|---------------------------|-------------------------|
| <b>Injection Details</b> |                           |                         |
| Injection Name:          | WIN406-1                  | Run Time (min): 30,00   |
| Vial Number:             | GA3                       | Injection Volume: 5,00  |
| Injection Type:          | Unknown                   | Channel: UV_VIS_1       |
| Calibration Level:       |                           | Wavelength: 210,0       |
| Instrument Method:       | Chromni                   | Bandwidth: n.a.         |
| Processing Method:       | Chromni Processing Method | Dilution Factor: 1,0000 |
| Injection Date/Time:     | 11.Mai.22 18:47           | Sample Weight: 1,0000   |

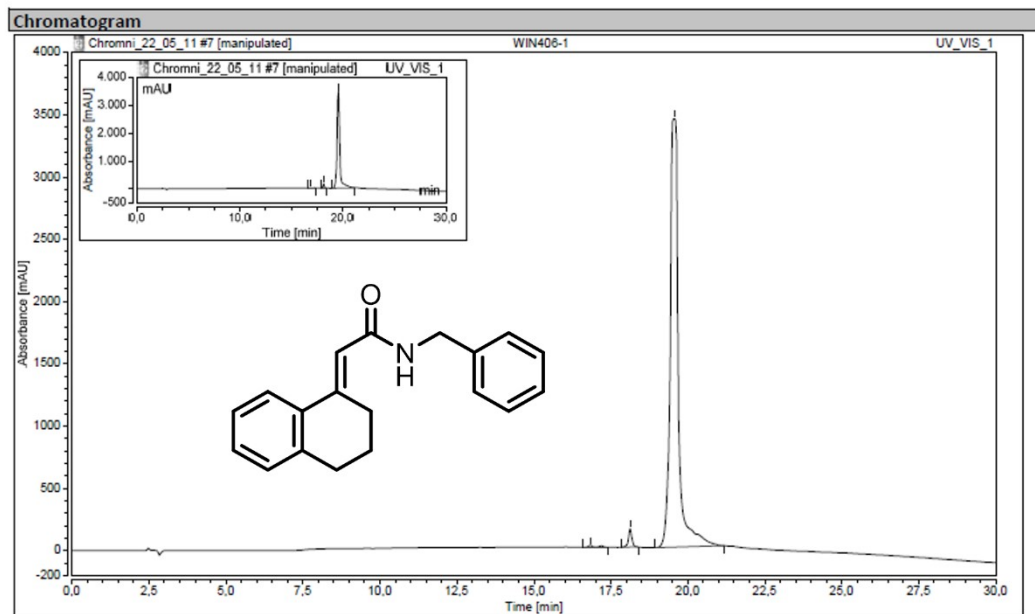

| Integration Results |           |                       |                 |                 |                    |                      |        |
|---------------------|-----------|-----------------------|-----------------|-----------------|--------------------|----------------------|--------|
| No.                 | Peak Name | Retention Time<br>min | Area<br>mAU*min | Height<br>mAU   | Relative Area<br>% | Relative Height<br>% | Amount |
| 1                   |           | 16,832                | 3,509           | 14,700          | 0,32               | 0,41                 | n.a.   |
| 2                   |           | 18,123                | 19,105          | 148,955         | 1,74               | 4,13                 | n.a.   |
| 3                   |           | 19,557                | 1077,956        | 3443,196        | 97,95              | 95,46                | n.a.   |
| <b>Total:</b>       |           |                       | <b>1100,570</b> | <b>3606,851</b> | <b>100,00</b>      | <b>100,00</b>        |        |

## (E)-N-Benzyl-2-(2,3-dihydro-1-benzopyran-4-ylidene)acetamide (16)

| Chromatogram and Results |                           |                         |
|--------------------------|---------------------------|-------------------------|
| <b>Injection Details</b> |                           |                         |
| Injection Name:          | WIN405                    | Run Time (min): 30,00   |
| Vial Number:             | GA3                       | Injection Volume: 5,00  |
| Injection Type:          | Unknown                   | Channel: UV_VIS_1       |
| Calibration Level:       |                           | Wavelength: 210,0       |
| Instrument Method:       | Chromni                   | Bandwidth: n.a.         |
| Processing Method:       | Chromni Processing Method | Dilution Factor: 1,0000 |
| Injection Date/Time:     | 12.Okt.22 18:14           | Sample Weight: 1,0000   |

### Chromatogram

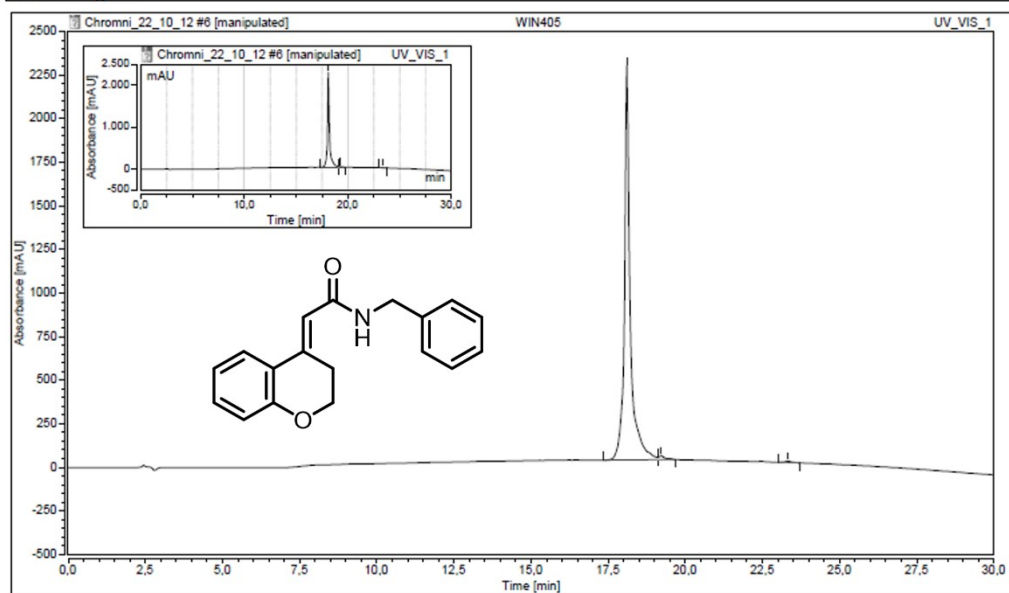

| Integration Results |           |                       |                 |                 |                    |                      |                |
|---------------------|-----------|-----------------------|-----------------|-----------------|--------------------|----------------------|----------------|
| No.                 | Peak Name | Retention Time<br>min | Area<br>mAU*min | Height<br>mAU   | Relative Area<br>% | Relative Height<br>% | Amount<br>n.a. |
| 1                   |           | 18,103                | 492,276         | 2258,700        | 98,54              | 98,58                | n.a.           |
| 2                   |           | 19,215                | 5,523           | 24,029          | 1,11               | 1,05                 | n.a.           |
| 3                   |           | 23,320                | 1,792           | 8,581           | 0,36               | 0,37                 | n.a.           |
| <b>Total:</b>       |           |                       | <b>499,592</b>  | <b>2291,310</b> | <b>100,00</b>      | <b>100,00</b>        |                |

**Methyl (1*RS*,6*SR*,8*RS*)-3-benzyl-4-oxo-8-phenyl-3-azaspiro[5.5]undecane-1-carboxylate (8a)**

| Chromatogram and Results |                           |                         |
|--------------------------|---------------------------|-------------------------|
| <b>Injection Details</b> |                           |                         |
| Injection Name:          | WIN340-1                  | Run Time (min): 30,00   |
| Vial Number:             | GA4                       | Injection Volume: 5,00  |
| Injection Type:          | Unknown                   | Channel: UV_VIS_1       |
| Calibration Level:       |                           | Wavelength: 210,0       |
| Instrument Method:       | Chromni                   | Bandwidth: n.a.         |
| Processing Method:       | Chromni Processing Method | Dilution Factor: 1,0000 |
| Injection Date/Time:     | 23.Feb.22 18:57           | Sample Weight: 1,0000   |

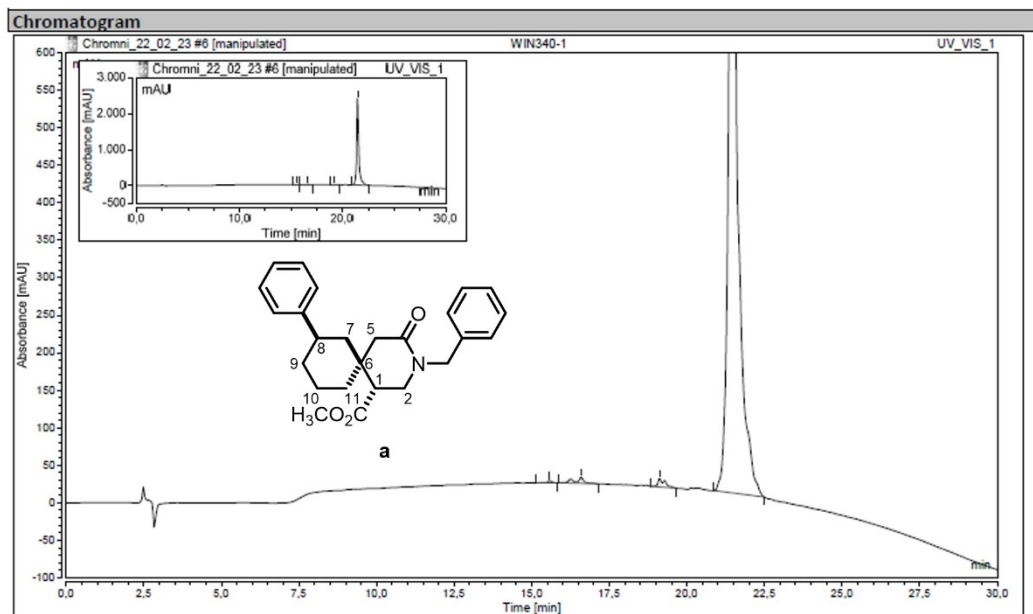

| Integration Results |           |                       |                 |                 |                    |                      |                |
|---------------------|-----------|-----------------------|-----------------|-----------------|--------------------|----------------------|----------------|
| No.                 | Peak Name | Retention Time<br>min | Area<br>mAU*min | Height<br>mAU   | Relative Area<br>% | Relative Height<br>% | Amount<br>n.a. |
| 1                   |           | 15,573                | 0,537           | 3,186           | 0,10               | 0,13                 | n.a.           |
| 2                   |           | 16,590                | 2,686           | 8,615           | 0,49               | 0,35                 | n.a.           |
| 3                   |           | 19,118                | 2,870           | 11,519          | 0,52               | 0,47                 | n.a.           |
| 4                   |           | 21,448                | 543,416         | 2411,539        | 98,89              | 99,04                | n.a.           |
| <b>Total:</b>       |           |                       | <b>549,510</b>  | <b>2434,860</b> | <b>100,00</b>      | <b>100,00</b>        |                |

**Methyl (1*SR*,6*SR*,8*RS*)-3-benzyl-4-oxo-8-phenyl-3-azaspiro[5.5]undecane-1-carboxylate (8b)**

| Chromatogram and Results |                           |                         |
|--------------------------|---------------------------|-------------------------|
| <b>Injection Details</b> |                           |                         |
| Injection Name:          | WIN340-2                  | Run Time (min): 30,00   |
| Vial Number:             | GA5                       | Injection Volume: 5,00  |
| Injection Type:          | Unknown                   | Channel: UV_VIS_1       |
| Calibration Level:       |                           | Wavelength: 210,0       |
| Instrument Method:       | Chromni                   | Bandwidth: n.a.         |
| Processing Method:       | Chromni Processing Method | Dilution Factor: 1,0000 |
| Injection Date/Time:     | 23.Feb.22 19:38           | Sample Weight: 1,0000   |

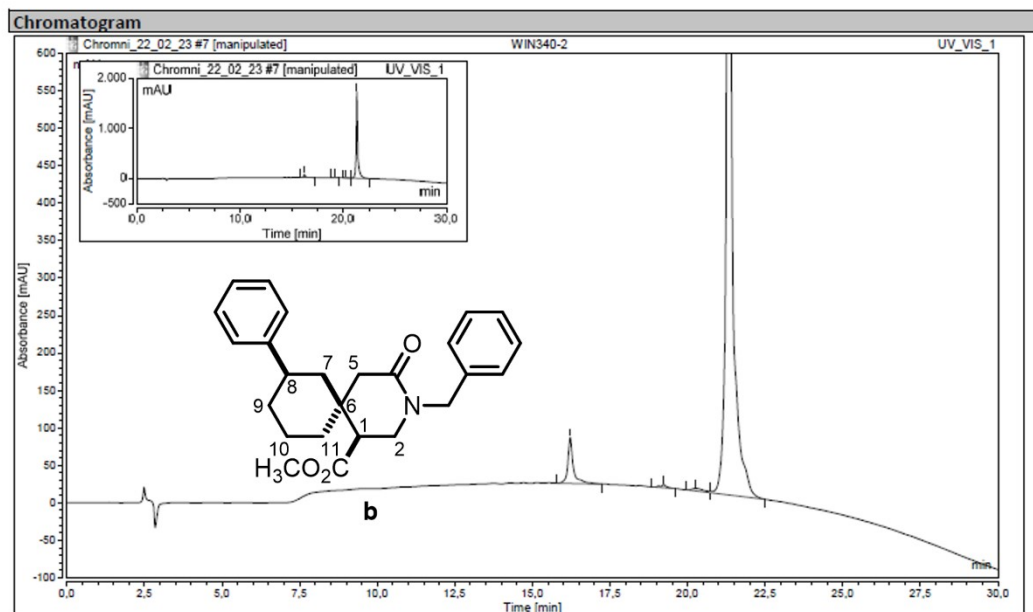

| Integration Results |           |                       |                 |                 |                    |                      |                |
|---------------------|-----------|-----------------------|-----------------|-----------------|--------------------|----------------------|----------------|
| No.                 | Peak Name | Retention Time<br>min | Area<br>mAU*min | Height<br>mAU   | Relative Area<br>% | Relative Height<br>% | Amount<br>n.a. |
| 1                   |           | 16,218                | 12,496          | 61,365          | 4,00               | 3,43                 | n.a.           |
| 2                   |           | 19,228                | 0,910           | 4,593           | 0,29               | 0,26                 | n.a.           |
| 3                   |           | 20,257                | 1,513           | 3,252           | 0,48               | 0,18                 | n.a.           |
| 4                   |           | 21,320                | 297,411         | 1720,787        | 95,22              | 96,13                | n.a.           |
| <b>Total:</b>       |           |                       | <b>312,329</b>  | <b>1789,996</b> | <b>100,00</b>      | <b>100,00</b>        |                |

**Methyl (2*RS*,6*SR*,7*RS*)-9-benzyl-10-oxo-2-phenyl-3-oxa-9-azaspiro[5.5]undecane-7-carboxylate (17a)**

| Chromatogram and Results |                           |                         |
|--------------------------|---------------------------|-------------------------|
| <b>Injection Details</b> |                           |                         |
| Injection Name:          | WIN401-1                  | Run Time (min): 30,00   |
| Vial Number:             | GB2                       | Injection Volume: 5,00  |
| Injection Type:          | Unknown                   | Channel: UV_VIS_1       |
| Calibration Level:       |                           | Wavelength: 210,0       |
| Instrument Method:       | Chromni                   | Bandwidth: n.a.         |
| Processing Method:       | Chromni Processing Method | Dilution Factor: 1,0000 |
| Injection Date/Time:     | 01.Jun.22 23:42           | Sample Weight: 1,0000   |

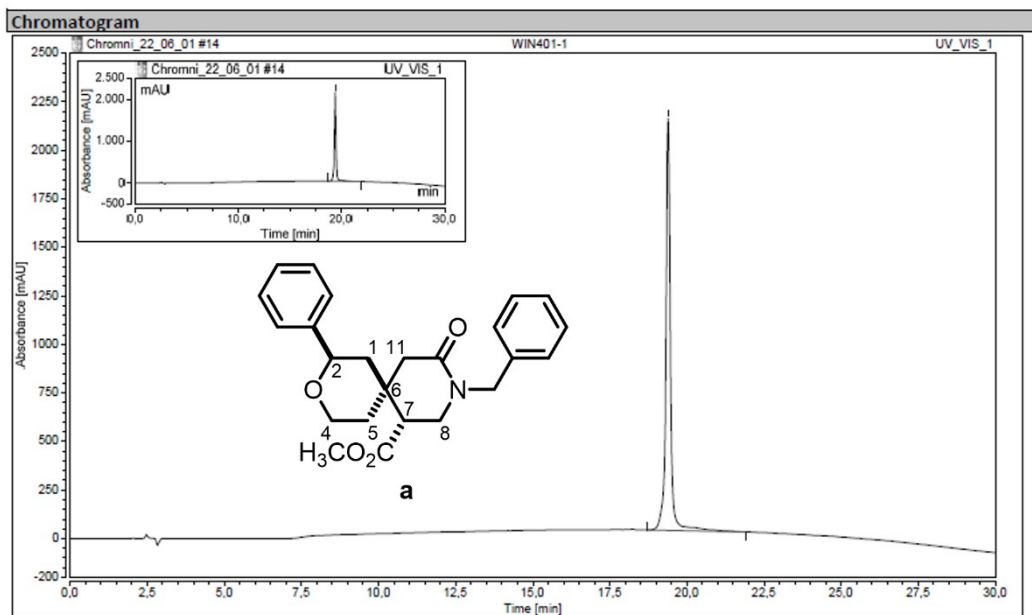

| Integration Results |           |                    |                |                 |                 |                   |             |
|---------------------|-----------|--------------------|----------------|-----------------|-----------------|-------------------|-------------|
| No.                 | Peak Name | Retention Time min | Area mAU*min   | Height mAU      | Relative Area % | Relative Height % | Amount n.a. |
| 1                   |           | 19,388             | 366,780        | 2123,775        | 100,00          | 100,00            | n.a.        |
| <b>Total:</b>       |           |                    | <b>366,780</b> | <b>2123,775</b> | <b>100,00</b>   | <b>100,00</b>     |             |

**Methyl (2R,6SR,7SR)-9-benzyl-10-oxo-2-phenyl-3-oxa-9-azaspiro[5.5]undecane-7-carboxylate (17b)**

| Chromatogram and Results |                           |                         |
|--------------------------|---------------------------|-------------------------|
| <b>Injection Details</b> |                           |                         |
| Injection Name:          | WIN-401-2                 | Run Time (min): 30,00   |
| Vial Number:             | GA5                       | Injection Volume: 5,00  |
| Injection Type:          | Unknown                   | Channel: UV_VIS_1       |
| Calibration Level:       |                           | Wavelength: 210,0       |
| Instrument Method:       | Chromni                   | Bandwidth: n.a.         |
| Processing Method:       | Chromni Processing Method | Dilution Factor: 1,0000 |
| Injection Date/Time:     | 17.Nov.21 16:40           | Sample Weight: 1,0000   |

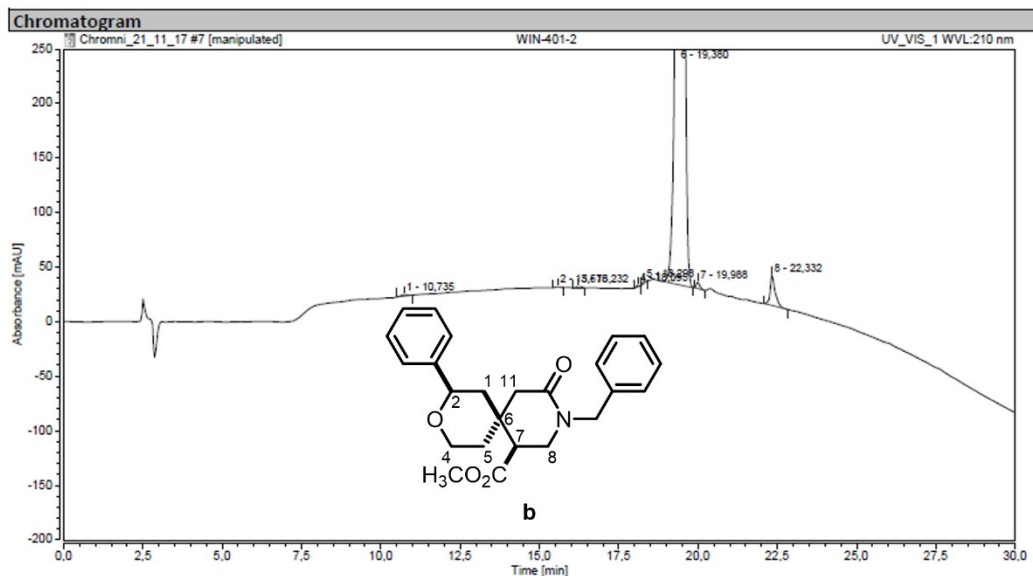

| Integration Results |           |                    |                |                 |                 |                   |             |
|---------------------|-----------|--------------------|----------------|-----------------|-----------------|-------------------|-------------|
| No.                 | Peak Name | Retention Time min | Area mAU*min   | Height mAU      | Relative Area % | Relative Height % | Amount n.a. |
| 1                   |           | 10,735             | 0,271          | 1,200           | 0,06            | 0,06              | n.a.        |
| 2                   |           | 15,573             | 0,107          | 0,702           | 0,03            | 0,03              | n.a.        |
| 3                   |           | 16,232             | 0,236          | 1,113           | 0,06            | 0,05              | n.a.        |
| 4                   |           | 18,095             | 0,140          | 1,630           | 0,03            | 0,07              | n.a.        |
| 5                   |           | 18,298             | 0,248          | 2,237           | 0,06            | 0,10              | n.a.        |
| 6                   |           | 19,380             | 411,565        | 2138,073        | 98,37           | 98,13             | n.a.        |
| 7                   |           | 19,988             | 0,751          | 5,925           | 0,18            | 0,27              | n.a.        |
| 8                   |           | 22,332             | 5,046          | 27,890          | 1,21            | 1,28              | n.a.        |
| <b>Total:</b>       |           |                    | <b>418,364</b> | <b>2178,770</b> | <b>100,00</b>   | <b>100,00</b>     |             |



**Methyl (1*RS*,6*SR*)-3-benzyl-4-oxo-14-oxa-3-azadispiro[5.1.5<sup>8</sup>.3<sup>6</sup>]hexadecane-1-carboxylate (18a)**

| Chromatogram and Results |                           |                         |
|--------------------------|---------------------------|-------------------------|
| <b>Injection Details</b> |                           |                         |
| Injection Name:          | WIN491                    | Run Time (min): 30,00   |
| Vial Number:             | GB8                       | Injection Volume: 5,00  |
| Injection Type:          | Unknown                   | Channel: UV_VIS_1       |
| Calibration Level:       |                           | Wavelength: 210,0       |
| Instrument Method:       | Chromni                   | Bandwidth: n.a.         |
| Processing Method:       | Chromni Processing Method | Dilution Factor: 1,0000 |
| Injection Date/Time:     | 21.Apr.22 03:35           | Sample Weight: 1,0000   |

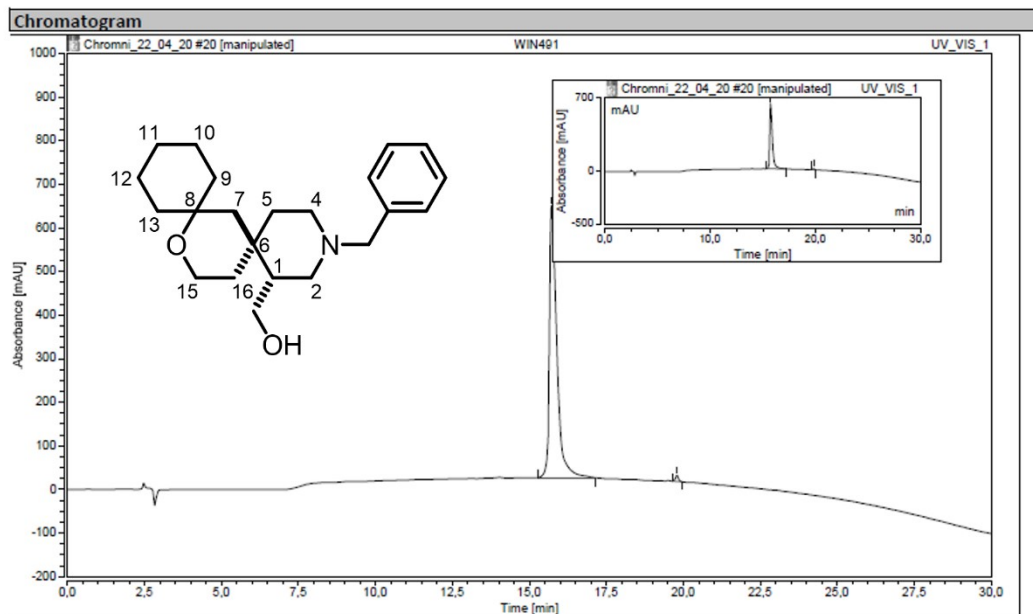

| Integration Results |           |                       |                 |                |                    |                      |                |
|---------------------|-----------|-----------------------|-----------------|----------------|--------------------|----------------------|----------------|
| No.                 | Peak Name | Retention Time<br>min | Area<br>mAU*min | Height<br>mAU  | Relative Area<br>% | Relative Height<br>% | Amount<br>n.a. |
| 1                   |           | 15,717                | 177,304         | 623,903        | 99,09              | 97,73                | n.a.           |
| 2                   |           | 19,787                | 1,634           | 14,515         | 0,91               | 2,27                 | n.a.           |
| <b>Total:</b>       |           |                       | <b>178,938</b>  | <b>638,418</b> | <b>100,00</b>      | <b>100,00</b>        |                |

**Methyl (1*RS*,6*RS*)-3-benzyl-4-oxo-14-oxa-3-azadispiro[5.1.5<sup>8</sup>.3<sup>6</sup>]hexadecane-1-carboxylate (18b)**

| Chromatogram and Results |                           |                   |          |
|--------------------------|---------------------------|-------------------|----------|
| <b>Injection Details</b> |                           |                   |          |
| Injection Name:          | WIN492                    | Run Time (min):   | 30,00    |
| Vial Number:             | GC1                       | Injection Volume: | 5,00     |
| Injection Type:          | Unknown                   | Channel:          | UV_VIS_1 |
| Calibration Level:       |                           | Wavelength:       | 210,0    |
| Instrument Method:       | Chromni                   | Bandwidth:        | n.a.     |
| Processing Method:       | Chromni Processing Method | Dilution Factor:  | 1,0000   |
| Injection Date/Time:     | 21.Apr.22 04:57           | Sample Weight:    | 1,0000   |

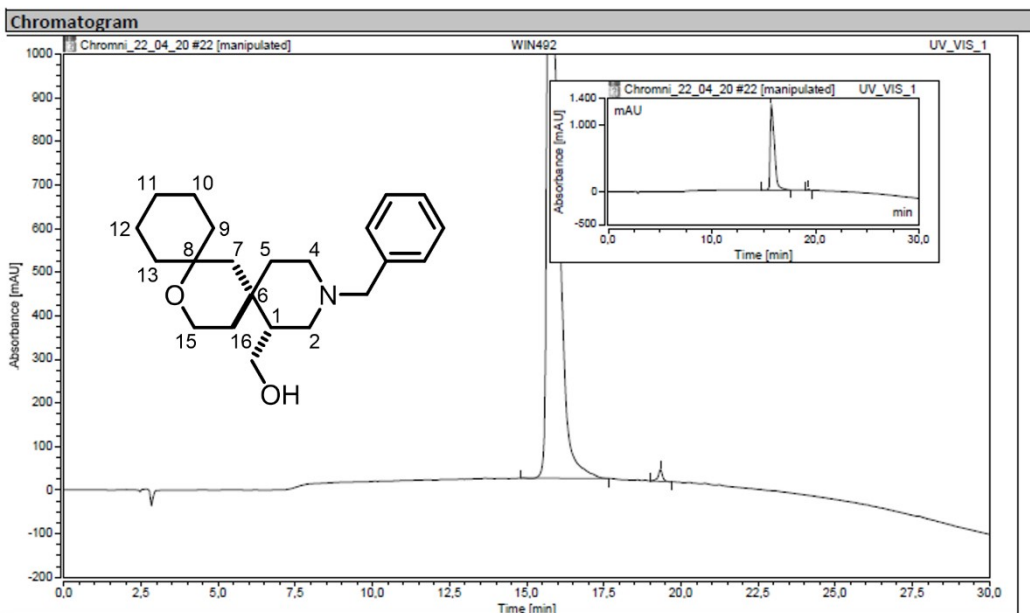

| Integration Results |           |                       |                 |                 |                    |                      |                |
|---------------------|-----------|-----------------------|-----------------|-----------------|--------------------|----------------------|----------------|
| No.                 | Peak Name | Retention Time<br>min | Area<br>mAU*min | Height<br>mAU   | Relative Area<br>% | Relative Height<br>% | Amount<br>n.a. |
| 1                   |           | 15,738                | 587,874         | 1293,695        | 99,27              | 97,94                | n.a.           |
| 2                   |           | 19,330                | 4,340           | 27,223          | 0,73               | 2,06                 | n.a.           |
| <b>Total:</b>       |           |                       | <b>592,214</b>  | <b>1320,918</b> | <b>100,00</b>      | <b>100,00</b>        |                |

**Methyl (1*SR*,5'*RS*)-1'-benzyl-2'-oxo-3,4-dihydro-2H-spiro(naphthalene-1,4'-piperidine)-5'-carboxylate (19a)**

| Chromatogram and Results |                           |                         |
|--------------------------|---------------------------|-------------------------|
| <b>Injection Details</b> |                           |                         |
| Injection Name:          | WIN-414-1                 | Run Time (min): 30,00   |
| Vial Number:             | GA8                       | Injection Volume: 5,00  |
| Injection Type:          | Unknown                   | Channel: UV_VIS_1       |
| Calibration Level:       |                           | Wavelength: 210,0       |
| Instrument Method:       | Chromni                   | Bandwidth: n.a.         |
| Processing Method:       | Chromni Processing Method | Dilution Factor: 1,0000 |
| Injection Date/Time:     | 17.Nov.21 18:42           | Sample Weight: 1,0000   |

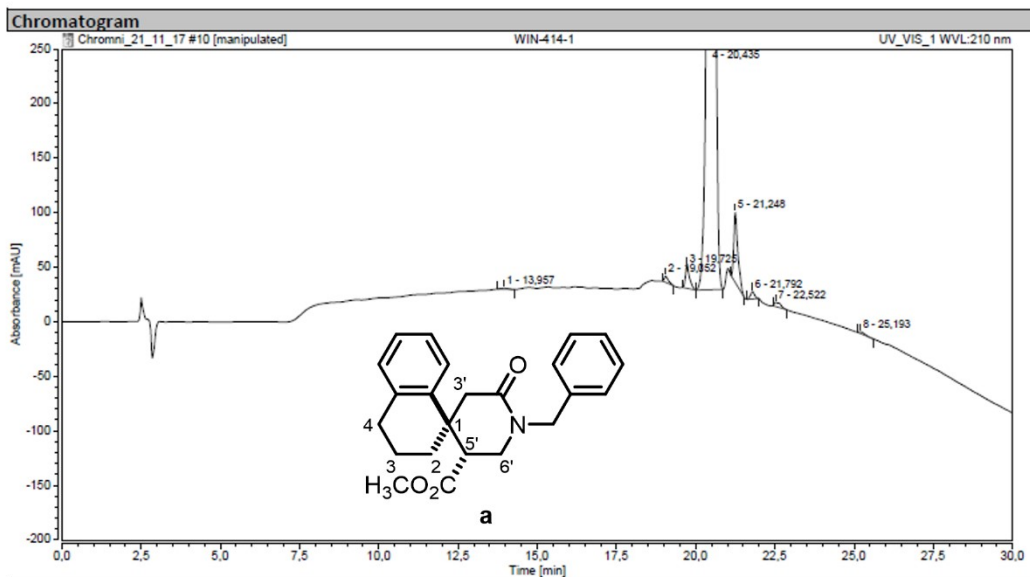

| Integration Results |           |                    |                |                 |                 |                   |             |
|---------------------|-----------|--------------------|----------------|-----------------|-----------------|-------------------|-------------|
| No.                 | Peak Name | Retention Time min | Area mAU*min   | Height mAU      | Relative Area % | Relative Height % | Amount n.a. |
| 1                   |           | 13,957             | 0,223          | 0,888           | 0,05            | 0,04              | n.a.        |
| 2                   |           | 19,052             | 0,869          | 5,879           | 0,21            | 0,26              | n.a.        |
| 3                   |           | 19,725             | 3,104          | 20,767          | 0,74            | 0,91              | n.a.        |
| 4                   |           | 20,435             | 406,019        | 2167,551        | 96,17           | 95,39             | n.a.        |
| 5                   |           | 21,248             | 9,518          | 64,468          | 2,25            | 2,84              | n.a.        |
| 6                   |           | 21,792             | 1,056          | 7,015           | 0,25            | 0,31              | n.a.        |
| 7                   |           | 22,522             | 1,015          | 4,121           | 0,24            | 0,18              | n.a.        |
| 8                   |           | 25,193             | 0,386          | 1,640           | 0,09            | 0,07              | n.a.        |
| <b>Total:</b>       |           |                    | <b>422,190</b> | <b>2272,329</b> | <b>100,00</b>   | <b>100,00</b>     |             |

**Methyl (1*SR*,5'*SR*)-1'-benzyl-2'-oxo-3,4-dihydro-2*H*-spiro(naphthalene-1,4'-piperidine)-5'-carboxylate (19b)**

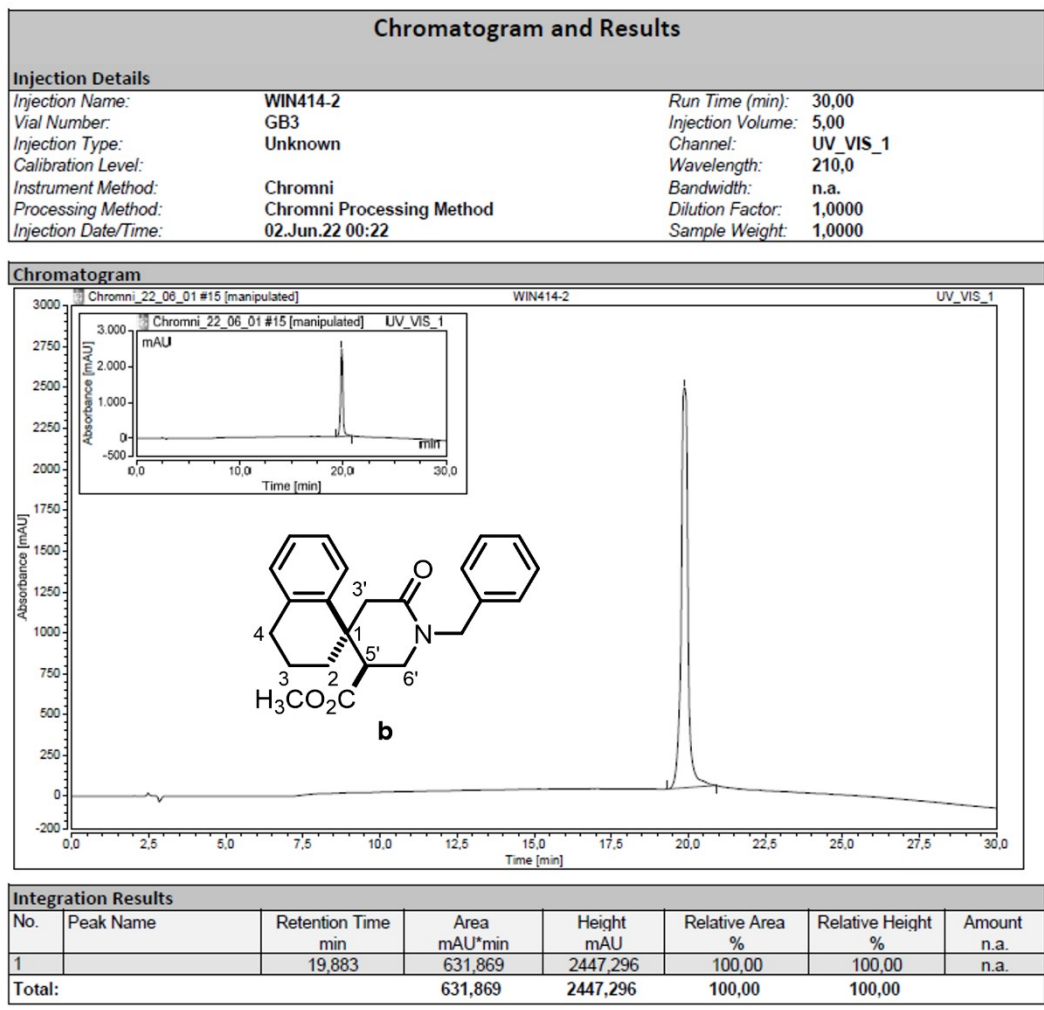

**Methyl (4*RS*,5'*SR*)-1'-benzyl-2'-oxospiro(chromane-4,4'-piperidine)-5'-carboxylate (20a)**

| Chromatogram and Results |                           |                         |
|--------------------------|---------------------------|-------------------------|
| <b>Injection Details</b> |                           |                         |
| Injection Name:          | WIN413-1                  | Run Time (min): 30,00   |
| Vial Number:             | GD2                       | Injection Volume: 5,00  |
| Injection Type:          | Unknown                   | Channel: UV_VIS_1       |
| Calibration Level:       |                           | Wavelength: 210,0       |
| Instrument Method:       | Chromni                   | Bandwidth: n.a.         |
| Processing Method:       | Chromni Processing Method | Dilution Factor: 1,0000 |
| Injection Date/Time:     | 23.Jun.22 11:38           | Sample Weight: 1,0000   |

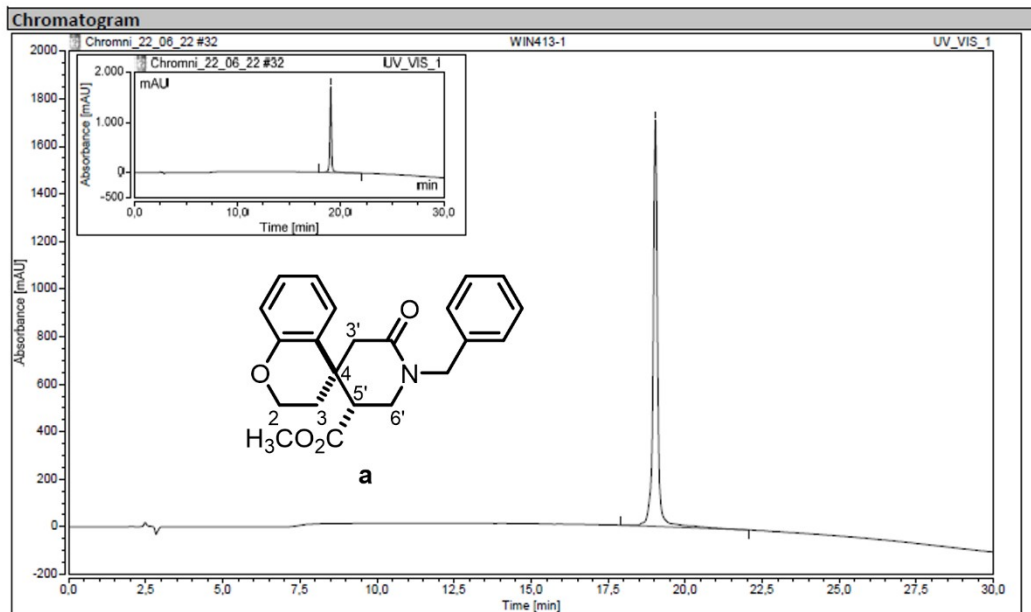

| Integration Results |           |                       |                 |                 |                    |                      |                |
|---------------------|-----------|-----------------------|-----------------|-----------------|--------------------|----------------------|----------------|
| No.                 | Peak Name | Retention Time<br>min | Area<br>mAU*min | Height<br>mAU   | Relative Area<br>% | Relative Height<br>% | Amount<br>n.a. |
| 1                   |           | 19,028                | 289,079         | 1709,917        | 100,00             | 100,00               | n.a.           |
| <b>Total:</b>       |           |                       | <b>289,079</b>  | <b>1709,917</b> | <b>100,00</b>      | <b>100,00</b>        |                |

**Methyl (4*RS*,5'*RS*)-1'-benzyl-2'-oxospiro(chromane-4,4'-piperidine)-5'-carboxylate (20b)**

| Chromatogram and Results |                           |                         |
|--------------------------|---------------------------|-------------------------|
| <b>Injection Details</b> |                           |                         |
| Injection Name:          | WIN-413-2                 | Run Time (min): 30,00   |
| Vial Number:             | GA7                       | Injection Volume: 5,00  |
| Injection Type:          | Unknown                   | Channel: UV_VIS_1       |
| Calibration Level:       |                           | Wavelength: 210,0       |
| Instrument Method:       | Chromni                   | Bandwidth: n.a.         |
| Processing Method:       | Chromni Processing Method | Dilution Factor: 1,0000 |
| Injection Date/Time:     | 17.Nov.21 18:02           | Sample Weight: 1,0000   |

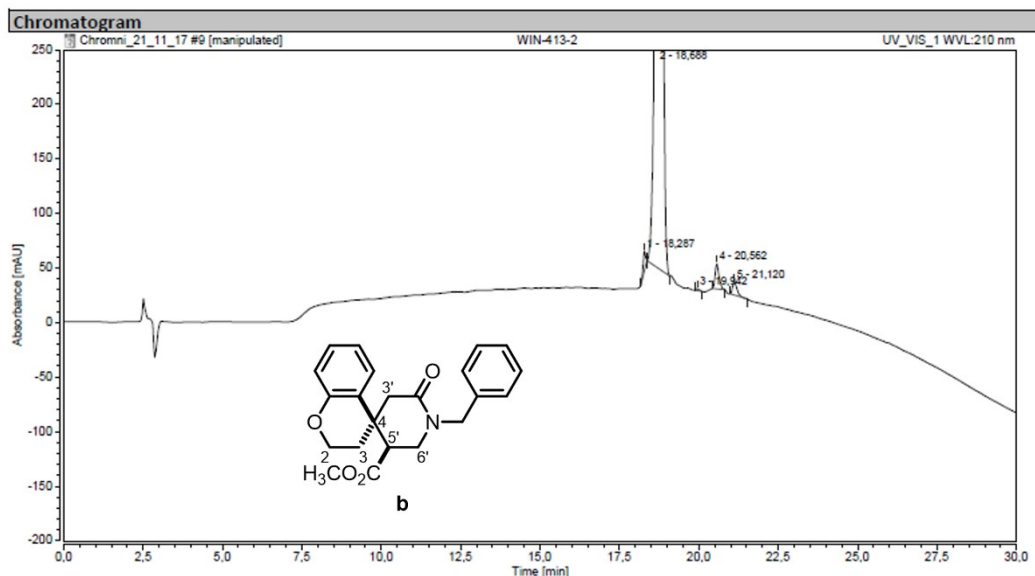

| Integration Results |           |                    |                |                 |                 |                   |             |
|---------------------|-----------|--------------------|----------------|-----------------|-----------------|-------------------|-------------|
| No.                 | Peak Name | Retention Time min | Area mAU*min   | Height mAU      | Relative Area % | Relative Height % | Amount n.a. |
| 1                   |           | 18,287             | 1,502          | 17,278          | 0,47            | 0,92              | n.a.        |
| 2                   |           | 18,688             | 309,512        | 1820,974        | 97,82           | 97,11             | n.a.        |
| 3                   |           | 19,942             | 0,213          | 1,865           | 0,07            | 0,10              | n.a.        |
| 4                   |           | 20,562             | 3,279          | 23,146          | 1,04            | 1,23              | n.a.        |
| 5                   |           | 21,120             | 1,896          | 11,923          | 0,60            | 0,64              | n.a.        |
| <b>Total:</b>       |           |                    | <b>316,402</b> | <b>1875,185</b> | <b>100,00</b>   | <b>100,00</b>     |             |

**((1*RS*,6*SR*,8*RS*)-3-Benzyl-8-phenyl-3-azaspiro[5.5]undecan-1-yl)methanol  
(21a)**

| Chromatogram and Results |                           |                         |
|--------------------------|---------------------------|-------------------------|
| <b>Injection Details</b> |                           |                         |
| Injection Name:          | WIN361F1                  | Run Time (min): 30,00   |
| Vial Number:             | GC4                       | Injection Volume: 5,00  |
| Injection Type:          | Unknown                   | Channel: UV_VIS_1       |
| Calibration Level:       |                           | Wavelength: 210,0       |
| Instrument Method:       | Chromni                   | Bandwidth: n.a.         |
| Processing Method:       | Chromni Processing Method | Dilution Factor: 1,0000 |
| Injection Date/Time:     | 29.Jul.21 02:38           | Sample Weight: 1,0000   |

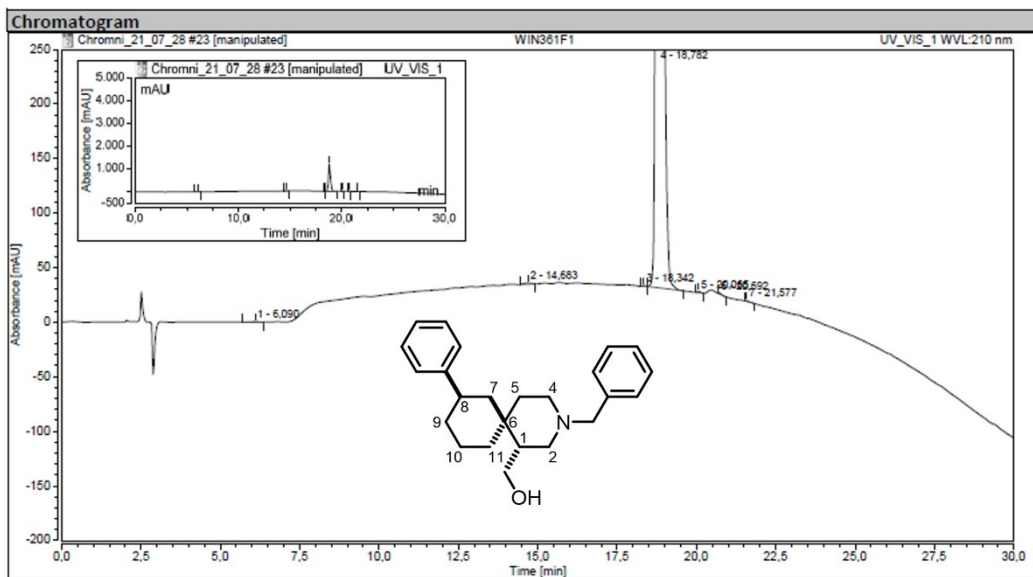

| Integration Results |           |                       |                 |                 |                    |                      |                |
|---------------------|-----------|-----------------------|-----------------|-----------------|--------------------|----------------------|----------------|
| No.                 | Peak Name | Retention Time<br>min | Area<br>mAU*min | Height<br>mAU   | Relative Area<br>% | Relative Height<br>% | Amount<br>n.a. |
| 1                   |           | 6,090                 | 0,138           | 0,394           | 0,05               | 0,03                 | n.a.           |
| 2                   |           | 14,683                | 0,281           | 1,059           | 0,10               | 0,09                 | n.a.           |
| 3                   |           | 18,342                | 0,081           | 0,848           | 0,03               | 0,07                 | n.a.           |
| 4                   |           | 18,782                | 272,161         | 1192,168        | 99,73              | 99,64                | n.a.           |
| 5                   |           | 20,065                | 0,126           | 1,027           | 0,05               | 0,09                 | n.a.           |
| 6                   |           | 20,692                | 0,058           | 0,410           | 0,02               | 0,03                 | n.a.           |
| 7                   |           | 21,577                | 0,057           | 0,524           | 0,02               | 0,04                 | n.a.           |
| <b>Total:</b>       |           |                       | <b>272,902</b>  | <b>1196,429</b> | <b>100,00</b>      | <b>100,00</b>        |                |

**((1*RS*,6*RS*,8*SR*)-3-Benzyl-8-phenyl-3-azaspiro[5.5]undecan-1-yl)methanol  
(21b)**

| Chromatogram and Results |                           |                   |          |
|--------------------------|---------------------------|-------------------|----------|
| <b>Injection Details</b> |                           |                   |          |
| Injection Name:          | WIN369                    | Run Time (min):   | 30,00    |
| Vial Number:             | GA5                       | Injection Volume: | 5,00     |
| Injection Type:          | Unknown                   | Channel:          | UV_VIS_1 |
| Calibration Level:       |                           | Wavelength:       | 210,0    |
| Instrument Method:       | Chromni                   | Bandwidth:        | n.a.     |
| Processing Method:       | Chromni Processing Method | Dilution Factor:  | 1,0000   |
| Injection Date/Time:     | 11.Aug.21 15:39           | Sample Weight:    | 1,0000   |

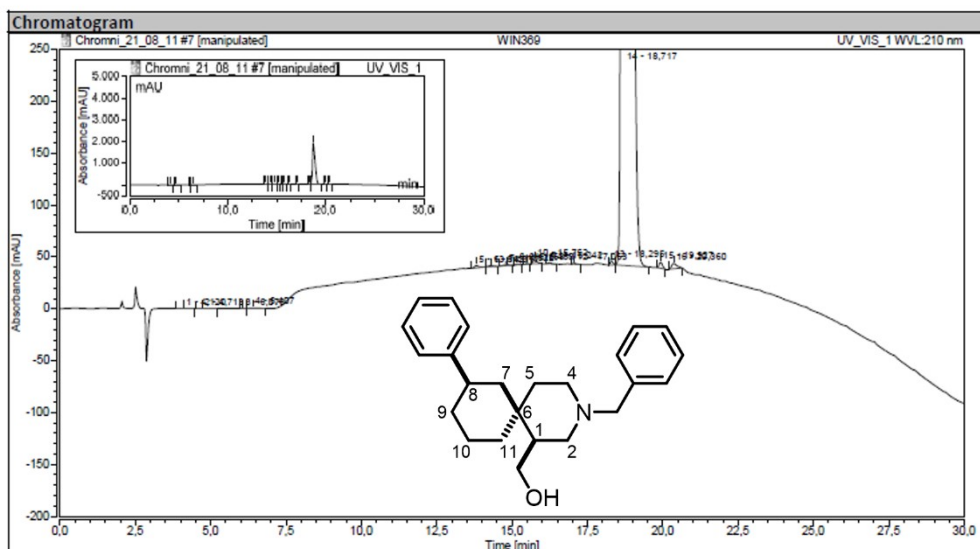

| Integration Results |           |                    |                |                 |                 |                   |             |
|---------------------|-----------|--------------------|----------------|-----------------|-----------------|-------------------|-------------|
| No.                 | Peak Name | Retention Time min | Area mAU*min   | Height mAU      | Relative Area % | Relative Height % | Amount n.a. |
| 1                   |           | 4,120              | 0,092          | 0,296           | 0,02            | 0,02              | n.a.        |
| 2                   |           | 4,713              | 0,064          | 0,193           | 0,01            | 0,01              | n.a.        |
| 3                   |           | 6,078              | 0,007          | 0,066           | 0,00            | 0,00              | n.a.        |
| 4                   |           | 6,407              | 0,126          | 0,362           | 0,02            | 0,02              | n.a.        |
| 5                   |           | 13,812             | 0,351          | 2,232           | 0,06            | 0,12              | n.a.        |
| 6                   |           | 14,317             | 0,165          | 0,783           | 0,03            | 0,04              | n.a.        |
| 7                   |           | 14,822             | 0,234          | 1,154           | 0,04            | 0,06              | n.a.        |
| 8                   |           | 15,163             | 0,099          | 0,835           | 0,02            | 0,04              | n.a.        |
| 9                   |           | 15,480             | 0,080          | 0,908           | 0,01            | 0,05              | n.a.        |
| 10                  |           | 15,752             | 0,664          | 4,227           | 0,11            | 0,22              | n.a.        |
| 11                  |           | 16,242             | 0,136          | 1,000           | 0,02            | 0,05              | n.a.        |
| 12                  |           | 17,063             | 0,133          | 0,977           | 0,02            | 0,05              | n.a.        |
| 13                  |           | 18,295             | 0,399          | 3,852           | 0,07            | 0,20              | n.a.        |
| 14                  |           | 18,717             | 598,422        | 1894,142        | 99,28           | 98,55             | n.a.        |
| 15                  |           | 19,927             | 0,707          | 5,840           | 0,12            | 0,30              | n.a.        |
| 16                  |           | 20,360             | 1,059          | 5,185           | 0,18            | 0,27              | n.a.        |
| <b>Total:</b>       |           |                    | <b>602,737</b> | <b>1922,050</b> | <b>100,00</b>   | <b>100,00</b>     |             |



**((2RS,6SR,7RS)-9-Benzyl-2-phenyl-3-oxa-9-azaspiro[5.5]undecan-7-yl)methanol (22a)**

| Chromatogram and Results |                           |                         |
|--------------------------|---------------------------|-------------------------|
| <b>Injection Details</b> |                           |                         |
| Injection Name:          | WIN472                    | Run Time (min): 30,00   |
| Vial Number:             | GA7                       | Injection Volume: 5,00  |
| Injection Type:          | Unknown                   | Channel: UV_VIS_1       |
| Calibration Level:       |                           | Wavelength: 210,0       |
| Instrument Method:       | Chromni                   | Bandwidth: n.a.         |
| Processing Method:       | Chromni Processing Method | Dilution Factor: 1,0000 |
| Injection Date/Time:     | 23.Feb.22 20:59           | Sample Weight: 1,0000   |

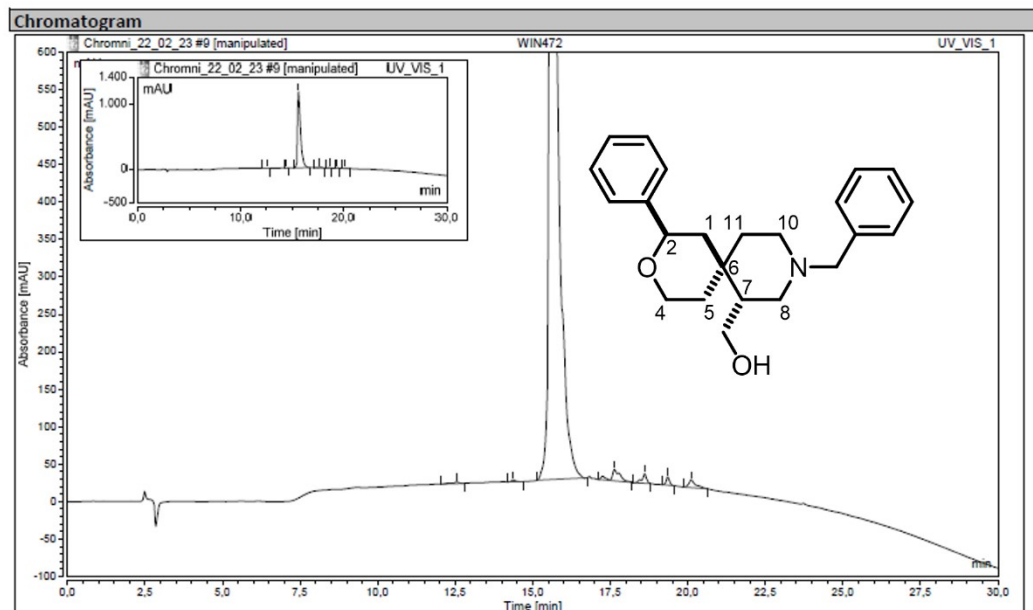

| Integration Results |           |                       |                 |                 |                    |                      |                |
|---------------------|-----------|-----------------------|-----------------|-----------------|--------------------|----------------------|----------------|
| No.                 | Peak Name | Retention Time<br>min | Area<br>mAU*min | Height<br>mAU   | Relative Area<br>% | Relative Height<br>% | Amount<br>n.a. |
| 1                   |           | 12,548                | 0,560           | 2,234           | 0,14               | 0,18                 | n.a.           |
| 2                   |           | 14,373                | 0,374           | 2,630           | 0,10               | 0,22                 | n.a.           |
| 3                   |           | 15,600                | 374,069         | 1157,727        | 96,85              | 95,40                | n.a.           |
| 4                   |           | 17,637                | 5,024           | 15,503          | 1,30               | 1,28                 | n.a.           |
| 5                   |           | 18,610                | 2,177           | 13,197          | 0,56               | 1,09                 | n.a.           |
| 6                   |           | 19,352                | 1,357           | 11,514          | 0,35               | 0,95                 | n.a.           |
| 7                   |           | 20,108                | 2,665           | 10,707          | 0,69               | 0,88                 | n.a.           |
| <b>Total:</b>       |           |                       | <b>386,226</b>  | <b>1213,512</b> | <b>100,00</b>      | <b>100,00</b>        |                |

**((2*RS*,6*SR*,7*SR*)-9-Benzyl-2-phenyl-3-oxa-9-azaspiro[5.5]undecan-7-yl)methanol (22b)**

| Chromatogram and Results |                           |                         |
|--------------------------|---------------------------|-------------------------|
| <b>Injection Details</b> |                           |                         |
| Injection Name:          | WIN-473                   | Run Time (min): 30,00   |
| Vial Number:             | GB1                       | Injection Volume: 5,00  |
| Injection Type:          | Unknown                   | Channel: UV_VIS_1       |
| Calibration Level:       |                           | Wavelength: 210,0       |
| Instrument Method:       | Chromni                   | Bandwidth: n.a.         |
| Processing Method:       | Chromni Processing Method | Dilution Factor: 1,0000 |
| Injection Date/Time:     | 16.Mrz.22 22:34           | Sample Weight: 1,0000   |

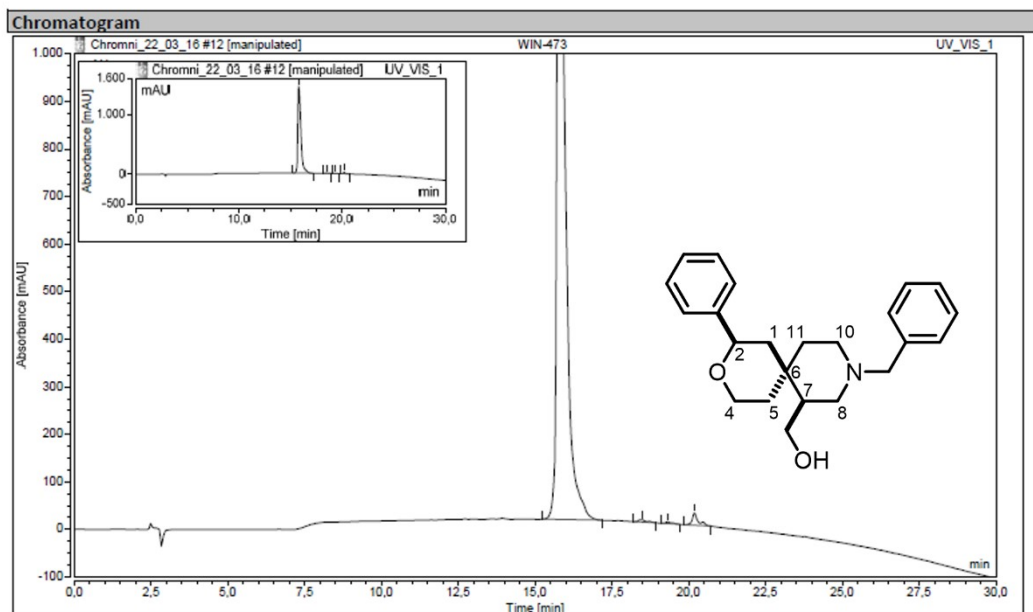

| Integration Results |           |                       |                 |                 |                    |                      |                |
|---------------------|-----------|-----------------------|-----------------|-----------------|--------------------|----------------------|----------------|
| No.                 | Peak Name | Retention Time<br>min | Area<br>mAU*min | Height<br>mAU   | Relative Area<br>% | Relative Height<br>% | Amount<br>n.a. |
| 1                   |           | 15,777                | 489,622         | 1458,521        | 98,35              | 97,63                | n.a.           |
| 2                   |           | 18,493                | 1,513           | 5,004           | 0,30               | 0,33                 | n.a.           |
| 3                   |           | 19,307                | 0,820           | 4,033           | 0,16               | 0,27                 | n.a.           |
| 4                   |           | 20,183                | 5,892           | 26,323          | 1,18               | 1,76                 | n.a.           |
| <b>Total:</b>       |           |                       | <b>497,848</b>  | <b>1493,882</b> | <b>100,00</b>      | <b>100,00</b>        |                |

**((1*RS*,6*SR*)-3-Benzyl-14-oxa-3-azadispiro[5.1.5<sup>8</sup>.3<sup>6</sup>]hexadecan-1-yl)methanol  
(23a)**

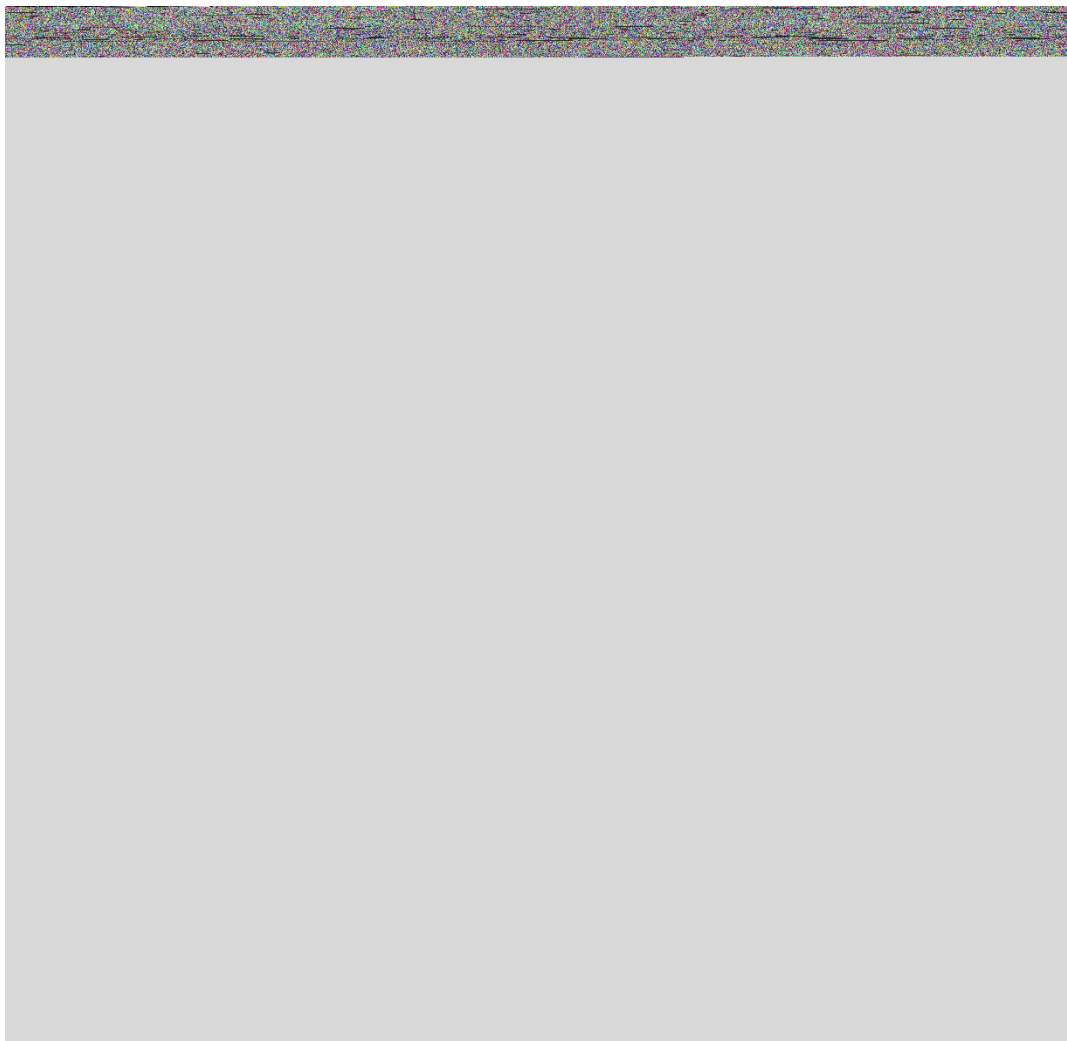

**((1*RS*,6*RS*)-3-Benzyl-14-oxa-3-azadispiro[5.1.5<sup>8</sup>.3<sup>6</sup>]hexadecan-1-yl)methanol  
(23b)**

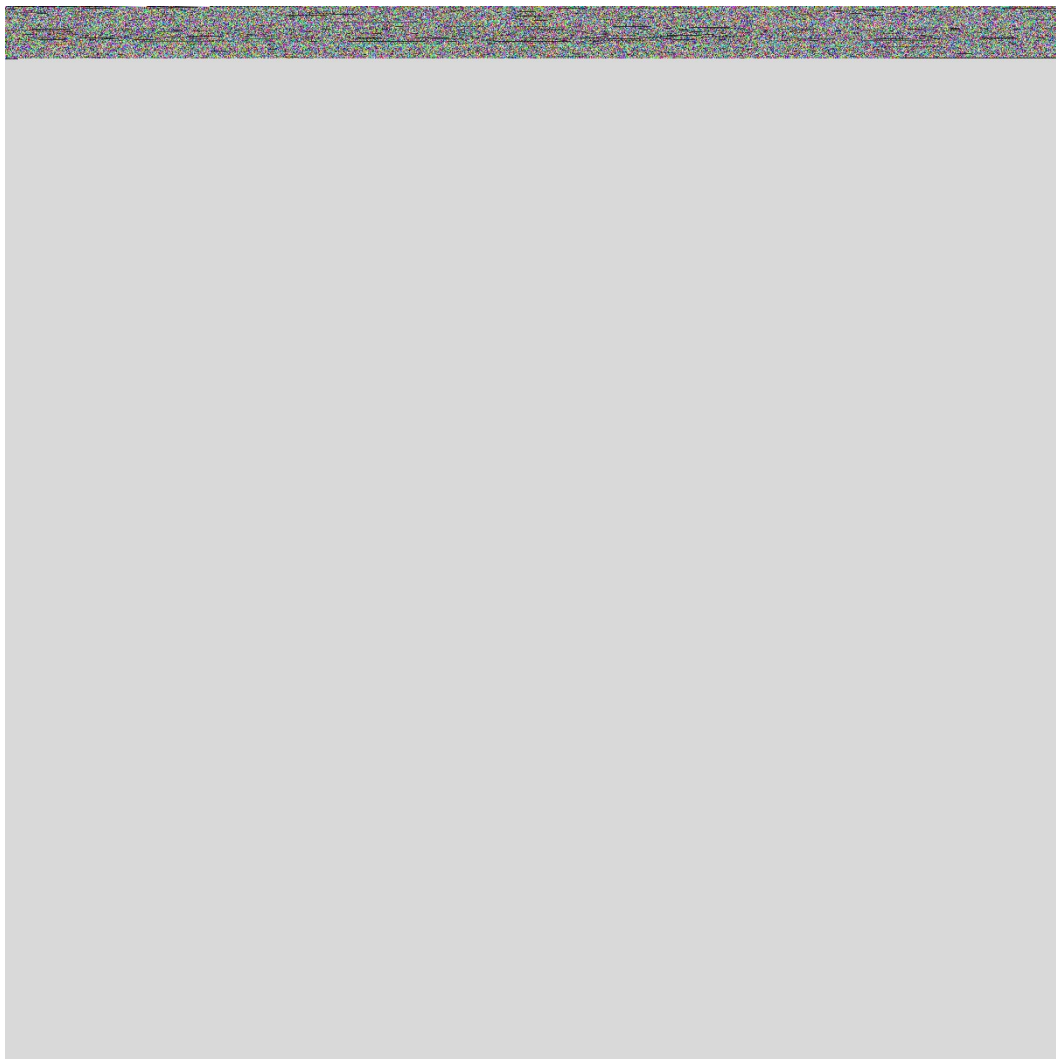

**((1*RS*,3'*SR*)-1'-Benzyl-3,4-dihydrospiro[naphthalene-1(2*H*),4'-piperidin]-3'-yl)methanol (24a)**

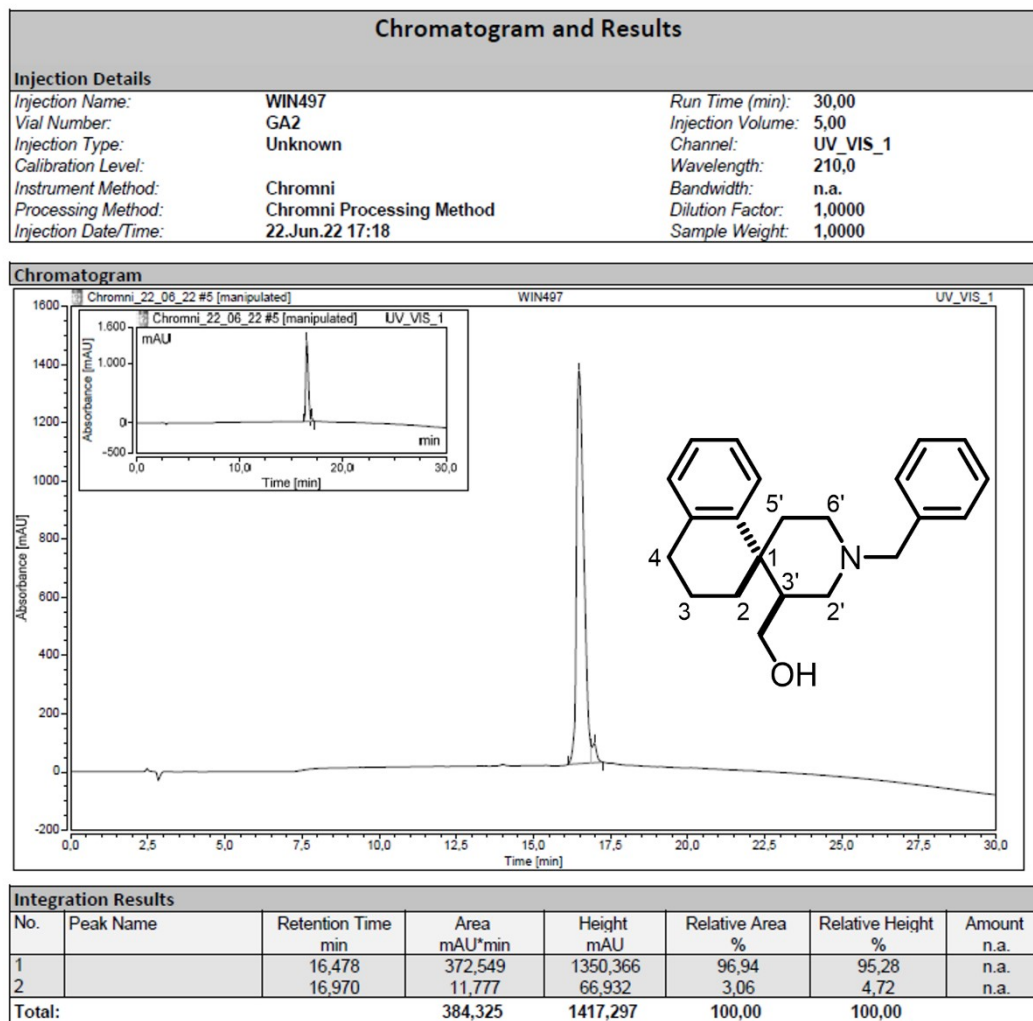

**((1*RS*,3'*RS*)-1'-Benzyl-3,4-dihydrospiro[naphthalene-1(2*H*),4'-piperidin]-3'-yl)methanol (24b)**

| Chromatogram and Results |                           |                         |
|--------------------------|---------------------------|-------------------------|
| <b>Injection Details</b> |                           |                         |
| Injection Name:          | WIN-498                   | Run Time (min): 30,00   |
| Vial Number:             | GA8                       | Injection Volume: 5,00  |
| Injection Type:          | Unknown                   | Channel: UV_VIS_1       |
| Calibration Level:       |                           | Wavelength: 210,0       |
| Instrument Method:       | Chromni                   | Bandwidth: n.a.         |
| Processing Method:       | Chromni Processing Method | Dilution Factor: 1,0000 |
| Injection Date/Time:     | 18.Mai.22 21:18           | Sample Weight: 1,0000   |

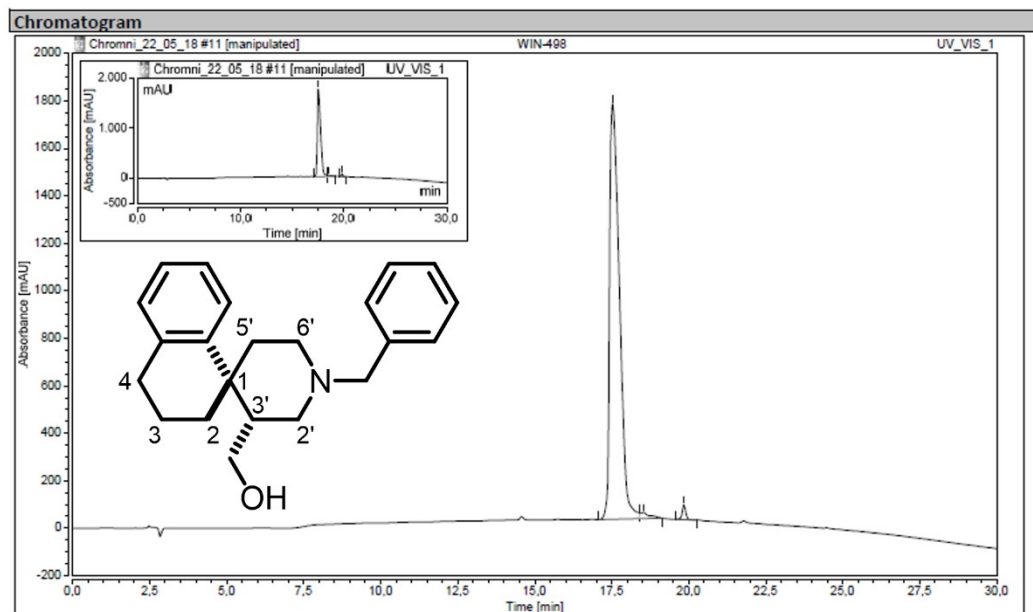

| Integration Results |           |                       |                 |                 |                    |                      |                |
|---------------------|-----------|-----------------------|-----------------|-----------------|--------------------|----------------------|----------------|
| No.                 | Peak Name | Retention Time<br>min | Area<br>mAU*min | Height<br>mAU   | Relative Area<br>% | Relative Height<br>% | Amount<br>n.a. |
| 1                   |           | 17,525                | 649,308         | 1750,289        | 97,32              | 95,06                | n.a.           |
| 2                   |           | 18,535                | 9,564           | 27,194          | 1,43               | 1,48                 | n.a.           |
| 3                   |           | 19,842                | 8,309           | 63,834          | 1,25               | 3,47                 | n.a.           |
| <b>Total:</b>       |           |                       | <b>667,181</b>  | <b>1841,316</b> | <b>100,00</b>      | <b>100,00</b>        |                |

**((3'*RS*,4*RS*)-1'-Benzylspiro[chromane-4,4'-piperidin]-3'-yl)methanol (25a)**

| Chromatogram and Results |                           |                   |          |
|--------------------------|---------------------------|-------------------|----------|
| <b>Injection Details</b> |                           |                   |          |
| Injection Name:          | WIN493                    | Run Time (min):   | 30,00    |
| Vial Number:             | GE5                       | Injection Volume: | 5,00     |
| Injection Type:          | Unknown                   | Channel:          | UV_VIS_1 |
| Calibration Level:       |                           | Wavelength:       | 210,0    |
| Instrument Method:       | Chromni                   | Bandwidth:        | n.a.     |
| Processing Method:       | Chromni Processing Method | Dilution Factor:  | 1,0000   |
| Injection Date/Time:     | 28.Apr.22 19:42           | Sample Weight:    | 1,0000   |

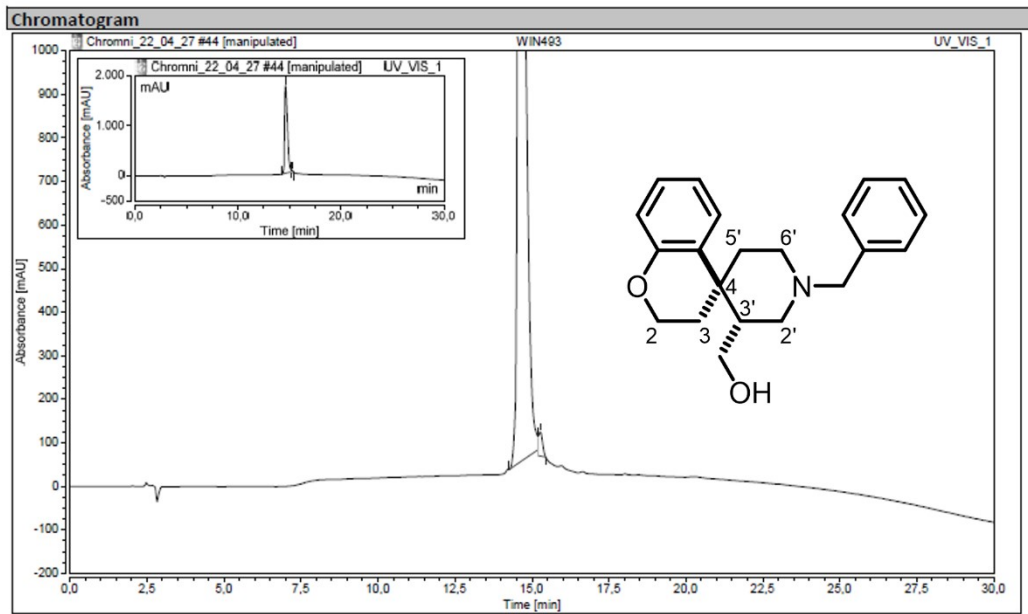

| Integration Results |           |                       |                 |                 |                    |                      |                |
|---------------------|-----------|-----------------------|-----------------|-----------------|--------------------|----------------------|----------------|
| No.                 | Peak Name | Retention Time<br>min | Area<br>mAU*min | Height<br>mAU   | Relative Area<br>% | Relative Height<br>% | Amount<br>n.a. |
| 1                   |           | 14,602                | 557,031         | 1758,637        | 98,43              | 96,90                | n.a.           |
| 2                   |           | 15,275                | 8,911           | 56,314          | 1,57               | 3,10                 | n.a.           |
| <b>Total:</b>       |           |                       | <b>565,941</b>  | <b>1814,950</b> | <b>100,00</b>      | <b>100,00</b>        |                |

# ((3'*RS*,4*SR*)-1'-Benzylspiro[chromane-4,4'-piperidin]-3'-yl)methanol (25b)

| Chromatogram and Results |                           |                   |          |
|--------------------------|---------------------------|-------------------|----------|
| <b>Injection Details</b> |                           |                   |          |
| Injection Name:          | WIN494                    | Run Time (min):   | 30,00    |
| Vial Number:             | GE6                       | Injection Volume: | 5,00     |
| Injection Type:          | Unknown                   | Channel:          | UV_VIS_1 |
| Calibration Level:       |                           | Wavelength:       | 210,0    |
| Instrument Method:       | Chromni                   | Bandwidth:        | n.a.     |
| Processing Method:       | Chromni Processing Method | Dilution Factor:  | 1,0000   |
| Injection Date/Time:     | 28.Apr.22 20:22           | Sample Weight:    | 1,0000   |

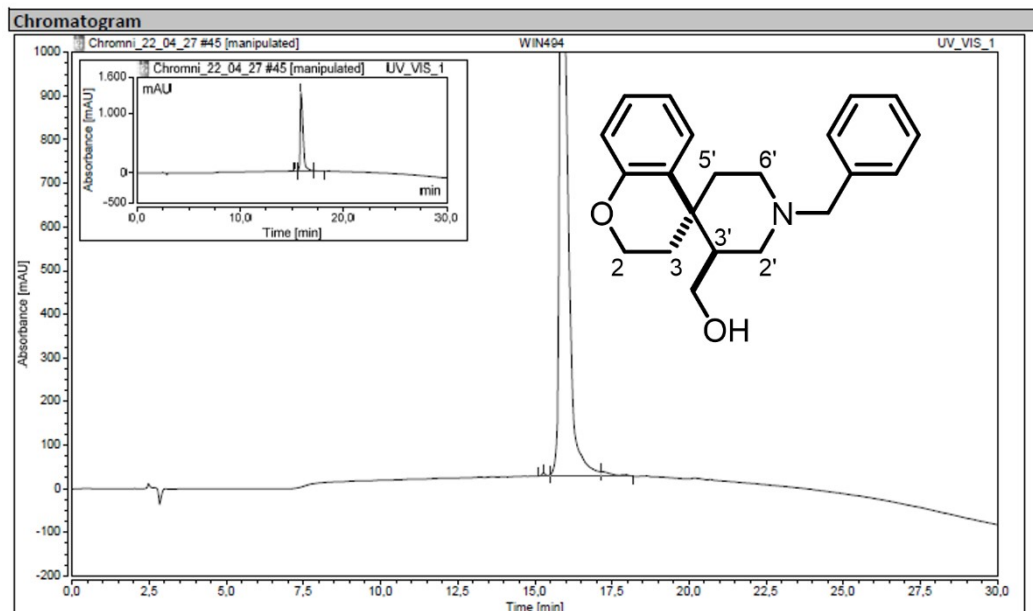

| Integration Results |           |                       |                 |               |                    |                      |                |
|---------------------|-----------|-----------------------|-----------------|---------------|--------------------|----------------------|----------------|
| No.                 | Peak Name | Retention Time<br>min | Area<br>mAU*min | Height<br>mAU | Relative Area<br>% | Relative Height<br>% | Amount<br>n.a. |
| 1                   |           | 15,278                | 1,047           | 6,782         | 0,24               | 0,51                 | n.a.           |
| 2                   |           | 15,873                | 431,511         | 1320,944      | 98,73              | 98,74                | n.a.           |
| 3                   |           | 17,130                | 4,508           | 10,118        | 1,03               | 0,76                 | n.a.           |
| Total:              |           |                       | 437,066         | 1337,845      | 100,00             | 100,00               |                |
